## **Forecasting waiting lists for elective procedures and surgery in England: a modelling study**

Dmitri Nepogodiev<sup>1-2</sup>, Radhika Acharya<sup>1</sup>, Daoud Chaudhry<sup>1</sup>, James C Glasbey<sup>1</sup>, Benjamin Harris<sup>1</sup>, Elizabeth Li<sup>1</sup>, Kate Jolly<sup>2</sup>, Aneel Bhangu<sup>1</sup>

1. Academic Department of Surgery, University of Birmingham, Birmingham, UK.
2. Institute of Applied Health Research, University of Birmingham, Birmingham, UK.

**Corresponding author:** Dr Dmitri Nepogodiev, Institute of Applied Health Research, University of Birmingham, Birmingham, United Kingdom, B15 2TH. Correspondence to: [dnepogodiev@doctors.org.uk](mailto:dnepogodiev@doctors.org.uk).

**Competing Interests:** The authors have no conflicts of interest to declare. The authors and their institutions have not received any payments or services in the past 36 months from a third party that could be perceived to influence, or give the appearance of potentially influence, the submitted work.

**Funding statement:** No funding was received for this study at any time for any aspect of the submitted work.

**Research ethics:** This study used publicly available, anonymised data only and is therefore exempt from the requirement for ethical review.

**Research reporting checklist:** There is no appropriate checklist available for this modelling study.

**Data Availability Statement:** All data produced in the present study are available upon reasonable request to the authors. Data requests can be emailed to [a.a.bhangu@bham.ac.uk](mailto:a.a.bhangu@bham.ac.uk).

**Keywords:** Elective, Surgery, Procedures, Endoscopy, Interventional radiology, Interventional Cardiology, Waiting list, Backlog, SARS-Cov-2, COVID-19, Coronavirus pandemic

## **Abstract**

**Introduction:** The aim of this study was to forecast the total need for elective procedures in England by 2030.

**Methods:** We used publicly available activity data from NHS Digital to estimate procedure-level shortfalls in elective procedures performed during the pandemic period (January 2020 to March 2022) compared to what would be expected based on pre-pandemic trends. We also estimated the procedure-level composition of the NHS waiting list immediately preceding the pandemic (December 2019). The total need for elective procedures in March 2022 was calculated by summing the pandemic shortfall with the pre-pandemic NHS waiting list. We projected the need for elective procedures through to January 2030 for four scenarios: current capacity (surgical volume remains at the same level as in February-March 2022), pessimistic scenario (elective procedure volume increases to pre-pandemic levels by July 2023 followed and remains at this level until 2030), central scenario (elective procedure volume returns to pre-pandemic levels by December 2022 followed by a 2% increase per year), optimistic scenario (elective procedure volume returns to pre-pandemic levels by December 2022 followed by a 4% increase per year)

**Results:** We estimated the total need for elective procedures in England in March 2022 was 4,347,469. Of these 4,347,469 patients, 3,304,513 (76.0%) were on a hidden waiting list. The greatest need was for General Surgery (1,522,366), Orthopaedics (976,875), and Ophthalmology (391,683). The procedures with the greatest need were sigmoidoscopy and colonoscopy (568,838), gastroscopy (447,830), cataract surgery (314,790), lower limb joint replacement (224,363), and interventional cardiology (349,300). We projected that at current capacity, the total number of elective procedures needed would increase to 14,608,195 by 2030. In the pessimistic scenario, elective procedure volume total elective procedures needed would increase to 8,507,087, in the central scenario it would increase to 5,420,999, and in the optimistic scenario it would decrease to 2,584,664 procedures.

**Discussion:** The estimate of 4.3 million elective procedures needed in England is considerably higher than the official NHS waiting list, reflecting a large hidden waiting list. Even in the most optimistic scenarios there will be a substantially larger waiting list in 2030 than pre-pandemic.

## **Introduction**

Prior to the COVID-19 pandemic NHS elective services in England regularly experienced service disruption due to increasing emergency care pressures, for example, due to winter pressures<sup>1</sup>. This resulted in increasing cancellation rates for elective procedures<sup>2</sup>. During the first COVID-19 wave, the NHS stopped most routine elective surgery, in order to redeploy staff and resources to support the acute COVID-19 response<sup>3-4</sup>. During subsequent waves, the NHS was unable to return to baseline pre-pandemic elective procedure volume due to a combination of inpatient safety concerns and staffing pressures<sup>5-6</sup>.

According to NHS waiting list data, 6.3 million patients were waiting for elective treatment in England in March 2022<sup>7</sup>. However, the waiting list does not fully reflect population need for elective procedures, since fewer new patients were seen in clinic by hospital consultants during the pandemic, as a result of reduced referrals and reduced clinic capacity due to redeployment of resources to support the acute COVID-19 response. This has resulted in a hidden waiting list comprising people who have symptoms or disease requiring elective procedures, but who have not been placed on the elective waiting list<sup>8</sup>.

In February 2022, the UK Government has committed £1.5 billion to financing elective surgery hubs to tackle the elective procedure backlog in England<sup>9</sup>. Whilst there is an ambition to increase surgical capacity above pre-pandemic levels, the full extent, including the hidden waiting list, of current and future need for elective procedures is not known. The aim of this study was to project the total number of patients who will need elective procedures in England by January 2030 based on a series of scenarios.

## **Methods**

In order to project future need for elective procedures, we first needed to determine baseline need. We estimated the number of patients who needed elective procedures in England in March 2022; this was taken as baseline need because March 2022 was the most recent month for which hospital activity data were available at the time of analysis. We then projected monthly figures for the number of patients who will need elective procedures in England through to 2030.

## **Definitions**

Elective procedure: this is used as a collective term for surgical operations and endoscopic, interventional cardiology, or interventional radiology procedures. An elective surgical operation was defined as an operation performed by a surgeon in an operating theatre on a planned admission to hospital. This definition is consistent with previous studies<sup>6,10</sup>. Obstetric operations were excluded as they do not contribute to the main waiting list. Both diagnostic and therapeutic endoscopy, interventional cardiology, and interventional radiology were included if performed in an operating theatre, endoscopy suite, or interventional radiology suite, on a planned admission to hospital. Both day-case procedures and procedures with an overnight admission were included. Minor procedures that are normally performed outside a theatre, endoscopy suite, or interventional radiology suite (e.g. paracentesis, lumbar puncture, joint injection), non-procedural therapeutics (e.g. drug infusion), and non-interventional imaging were excluded. A breakdown of the 1,139 OPCS Classification of Interventions and Procedures codes fulfilling inclusion criteria is provided in Supplementary Table 1. Calculations were performed at the level of individual OPCS codes, but to aid interpretation, the 1,139 OPCS codes were combined in to 130 procedure categories, which in turn were further summed to 16 sub-specialties and 10 specialties (Supplementary Table 1).

Day-case elective procedure: day-case procedures are completed without an overnight stay in hospital. For this analysis, we classified procedures as day-case or as requiring overnight admission. Using AHES-APC (see below), we reviewed length of hospital stay for each OPCS code in 2018-19 and classified them as day-case if they had an average length of hospital stay under 1 day, or 50% or more of cases were performed as day-cases.

Incident need for elective procedures: The number of new patients each year who develop symptoms or disease that require an elective procedure. The incident need rate is the incident need per 1,000 population.

Pandemic shortfall in elective procedures: the reduction in the number of elective procedures performed during the pandemic period (January 2020 to March 2022) compared to what would be expected based on pre-pandemic trends, adjusted for population growth and ageing.

Total need for elective procedures: the total number elective procedures needed in England, at a given point in time. This count includes all patients regardless of whether or not they are on an NHS waiting list.

NHS waiting list: patients who are on the NHS waiting list for an elective procedure.

Hidden waiting list: patients who need elective procedures, but who have not been added to the NHS waiting list by a hospital consultant for reasons related to the COVID-19 pandemic. This might occur in the following circumstances:

- The patient did not see their general practitioner (GP) and therefore they were not referred to a consultant.
- The patient did see their GP, who decided to not make a referral to a consultant due to factors related to the pandemic.
- The GP did make a referral to a consultant, but the patient has not yet been seen by the consultant due to the pandemic significantly increasing waiting times for clinic.
- The patient did see a hospital consultant, but, due to factors related to the pandemic, have not yet been added to the NHS waiting list.
- However, if a patient was seen by a hospital consultant and was added them to the NHS waiting list, this patient would appear on the NHS waiting list rather than the hidden waiting list.

Based on these definitions, total need was calculated as the sum of the NHS waiting list and hidden waiting list:

$$N = W + H$$

**Equation 1**

Where

N = Total need for elective procedures at baseline in a given month

W = Number of patients waiting for elective procedures on the NHS waiting list in a given month

H = Hidden waiting list in a given month

## **Conceptual framework**

### *Key assumptions*

This analysis is based on the following assumptions:

- Prior to the COVID-19 pandemic, the NHS waiting list for elective care included all people who needed elective procedures; i.e. there was no hidden waiting list pre-pandemic before the pandemic.
- Age-sex specific incident need rates for elective procedures remained constant during the pandemic period. Consequently, if there was a reduction in elective procedure activity during the pandemic period (pandemic shortfall) this would result in a backlog of patients, increasing total need for elective procedures.
- There is no attrition to individuals' need for elective procedures over time. This means that all patients who need elective procedures stay on the waiting list regardless of how long they have to wait to have their procedure.
- Age and sex specific incident need rates for elective procedures will remain constant through to 2030. Our modelling takes in to account projected changes in England's population structure over time, meaning that the number of elective procedures needed each year (incident need) may increase over time, even though we have assumed that age-sex specific incident need rates do not change.

### *Approach to modelling*

We projected the number of patients who will need elective procedures in England each month from April 2022 to December 2029. The following calculation was performed for each month:

$$N_m = N_{m-1} + I_m - P_m \quad \text{Equation 2}$$

Where

$N_m$  = Total need for elective procedures at the end of month  $m$

$N_{m-1}$  = Total need for elective procedures at the end of the month preceding month  $m$

$I_m$  = Incident need for elective procedures in month  $m$ . This was calculated as one twelfth of annual incident need in the relevant year. Annual incident need was adjusted for projected changes in population structure over time

$P_m$  = Number of elective procedures performed in month  $m$

Baseline total need for elective procedures was estimated for March 2022 based on real-world NHS activity data. Total need in March 2022 was calculated as sum of the pre-pandemic waiting list and the pandemic shortfall in elective procedures:

$$N_b = W_p + S \quad \text{Equation 3}$$

Where

$N_b$  = Total need for elective procedures at baseline in March 2022

$W_p$  = Number of patients on the NHS waiting list for elective procedures immediately before the pandemic in December 2019

$S$  = Pandemic shortfall in elective procedures

### **Data sources**

This study used the following NHS (National Health Service) England data which are publicly available from NHS Digital:

- Monthly Hospital Episode Statistics for Admitted Patient Care (MHES-APC) activity data for April 2018 to March 2022<sup>11</sup>.
- Annual Hospital Episode Statistics for Admitted Patient Care (AHES-APC) activity data for 2018-19 and 2020-21<sup>11</sup>.
- NHS England waiting list data for March 2015 to March 2022<sup>7</sup>.
- NHS reference costs for 2019-20 (most recent available)<sup>12</sup>.

In addition, the following data were accessed from the Office for National Statistics (ONS):

- Population (age and sex) structure data for mid-2018 to mid-2020<sup>13</sup>.
- Population (age and sex) structure projections for 2021 to 2029<sup>14</sup>.
- Health-system level population data for mid-2020 (most recent available)<sup>15</sup>.

### *Hospital Episode Statistics*

Hospital Episode Statistics (HES) captures data for inpatient NHS patient episodes across all NHS and private hospitals in England<sup>11</sup>. HES has monthly (MHES-APC) and annual (AHES-APC) data releases. AHES-APC data are released around September for the preceding NHS year (April to March) and MHES-APC data are released monthly on a rolling basis.

Hospital Episode Statistics (HES) provides information on finished consultant episodes and finished admission episodes. A finished consultant episode is a period of care under a particular consultant. A patient may have multiple finished consultant episodes during a finished admission episode, a continuous period of care within a particular hospital.

AHES-APC provides a breakdown of finished consultant episodes at procedure-level (OPCS classification). In contrast, MHES-APC only provides a breakdown for finished consultant episodes at specialty-level and whilst a subtotal is given for finished consultant episodes with procedures performed, this includes a wider range of treatments than our definition of elective procedures; for example, simple injections, minor procedures (e.g. paracentesis, lumbar puncture), drug infusions. Therefore, when possible, it is preferable to use AHES-APC data since this provides a more granular breakdown.

The totals for finished consultant episodes provided by both AHES-APC and MHES-APC are not broken down into elective versus emergency episodes. Instead, both datasets provide subtotals for the number of finished admission episodes that are elective versus emergency episodes. Therefore, we used the proportion of finished admission episodes that are elective episodes as a surrogate for the proportion of finished consultant episodes that are elective. We used the following equation to estimate the number of elective finished consultant episodes:

$$K = FCE * (1 - (E / FAE)) \quad \text{Equation 4}$$

Where:

K = Number of elective finished consultant episodes

FCE = Total number of finished consultant episodes

E = Number of finished admission episodes that were emergencies

FAE = Total number of finished admission episodes

### **Pandemic shortfall in elective procedures**

The methodology for estimating the shortfall in elective procedures expanded on methodology previously published in The Lancet<sup>6</sup>.

For the purpose of this study, we considered the COVID-19 pandemic to have started on 1 January 2020; the first COVID-19 case was reported in Wuhan on 31 December 2019. The most recent available MHES-APC data was for March 2022. Therefore, it was possible to estimate the shortfall in elective procedures over the period January 2020 to March 2022 (27 months).

We calculated the shortfall in elective procedures in the following way for the pandemic period (January 2020 to March 2022):

$$S = I_p - P_p \quad \text{Equation 5}$$

Where:

S = Pandemic shortfall in January 2020 to March 2022

$I_p$  = Incident need for elective procedures during the pandemic period

$P_p$  = Number of procedures completed during the pandemic period

### *Calculation of incident need*

Elective procedure activity in 2018-19 (last pre-pandemic year for which AHES-APC data is available) was used as the baseline to estimate incident need for elective procedures. However, as England has a growing and aging population, incident need for elective procedures in absolute terms can be expected to increase over time. To take in to account projected changes in population structure, we estimated age-sex incident need rates and applied these to ONS population structure projections for 2020-29.

Age and sex specific incident need rates were calculated based on the AHES-APC data for 2018-19. The following equation was used to calculate age and sex specific incident need rates:

$$I_g = X_g / Y_g \quad \text{Equation 6}$$

Where:

$I_g$  = Incident need rate for elective procedures for a specific age-sex group

$X_g$  = Number of elective procedures performed for a specific age-sex group in 2018-19

$Y_g$  = Total population for a specific age-sex group in England in mid-2018

We calculated total incident need for each year by summing incident need for each age-sex group:

$$I_q = \Sigma (I_g * Y_{qg}) \quad \text{Equation 7}$$

Where:

$I_q$  = Total incident need for elective procedures in year q

$I_g$  = Incident need rate for elective procedures for age-sex group

$Y_{qg}$  = Population for age-sex group in England in year q

To estimate incident need for elective procedures during the pandemic period (January 2020 to March 2022) age and sex specific incident need rates were calculated for the following groups (age-sex categorisation 1): female <18 years, female 18-39 years, female 40-64 years, female 65-79 years, female  $\geq 80$  years, male <18 years, male 18-39 years, male 40-64 years, male 65-79 years, male  $\geq 80$  years. Calculations were performed at OPCS code level to enable estimation of procedure-level pandemic shortfalls and therefore procedure-level total need in March 2022.

The same methodology was used to estimate incident need for elective procedures in April 2022 to December 2029, with the exception that we calculated overall total need for each year, rather than procedure-level need. This allowed us to use more granular age-sex groups for the calculation of age-sex specific incident need rates (age-sex categorisation 2); we calculated age-sex specific incident need rates separately for females and for males, with the following age breakdown: 0-4, 5-9, 10-14, 15-19, 20-24, 25-29, 30-34, 35-39, 40-44, 45-49, 50-54, 55-59, 60-64, 65-69, 70-74, 75-79, 80-84, 85-89,  $\geq 90$  years.



### *Calculation of pandemic shortfall using AHES-APC data*

The AHES-APC dataset was used in preference to MHES-APC when possible, as it enables data to be extracted for elective procedures meeting the study inclusion criteria. Therefore, the following data sources were used:

- Pre-pandemic baseline number and breakdown of elective procedures was based on AHES-APC data for 2018-19 (the last full NHS year before the pandemic).
- For the pandemic period:
  - Data for April 2020 to March 2021 was based on AHES-APC data for 2020-21 (the only HES-APC dataset where the full reporting period was during the pandemic).
  - Data for January to March 2020, and April 2021 to March 2022 were based on MHES-APC data. The most recent available MHES-APC data are for March 2022.

The AHES-APC dataset includes a breakdown of finished consultant episodes by age and separately by sex. This allowed us to calculate shortfall in 2020-21 for each OPCS code for ten age-sex groups (age-sex categorisation 1, see above) based on Equation 5.

### *Calculation of pandemic shortfall using MHES-APC data*

We first summed monthly MHES-APC data for April 2018 to March 2019 (pre-pandemic baseline), and for January to March 2020 and April 2021 to March 2022 (15 month pandemic period for which AHES-APC data is not available) to calculate specialty-level totals.

As MHES-APC includes a wider range of treatments than the elective procedures included in this study, we had to estimate the number of elective procedures completed in January to March 2020 and April 2021 to March 2022 from the MHES-APC data. To do this, for each specialty, we calculated the number of elective procedures in 2018-19 in AHES-APC as a proportion of total patients recorded in MHES-APC in 2018-19. We applied this proportion to MHES-APC total for the 15 pandemic months to calculate a specialty-level breakdown of elective procedures performed during this period.

The specialty-level shortfall in procedures during January to March 2020 and April 2021 to March 2022 was calculated by subtracting specialty-level estimates of elective procedures performed from the calculated incident need for elective procedures during these months.

We estimated procedure-level breakdown for the shortfall during January to March 2020 and April 2021 to March 2022 based on the assumption that the pattern of this shortfall would be consistent with the shortfalls observed in 2020-21. To do this, we took the procedure-level shortfalls calculated for 2020-21 and summed them at specialty-level (for procedures where an increase rather than decrease (shortfall) in activity was observed in 2020-21, the shortfall was set as zero). We then calculated the proportion of the shortfall accounted for by each procedure within its specialty. These proportions were then applied to specialty-level shortfalls for January to March 2020 and April 2021 to March 2022 to achieve a procedure-level breakdown for that period.

## NHS waiting list

NHS waiting list data were accessed from NHS Digital to estimate the number of patients on the NHS waiting list who were waiting for elective procedures in December 2019 (last pre-pandemic month) and March 2022<sup>7</sup>.

Monthly NHS Waiting list data are reported by specialty for three categories:

- Incomplete pathways: patients who have been referred for treatment and are on the waiting list. This includes both patients waiting for clinic review, as well as those who are waiting for hospital admission for treatment (e.g. surgery, endoscopy).
- Admitted pathways: patients whose treatment was completed that month and whose treatment included an admitted care. This includes both day-case and inpatient admissions for a wider range of treatments than our definition of elective procedures (i.e. includes surgery, endoscopy, interventional radiology and cardiology, but also simple injections, lumbar puncture, drug infusions etc).
- Non-admitted pathways: patients whose treatment was completed that month and whose treatment did not involve admitted care (e.g. discharged from outpatient clinic).

For each specialty category in the NHS waiting list data, we estimated the number of incomplete pathways for that would translate to admitted pathways when completed using the following equation:

$$\text{Path}_{\text{est}} = \text{Path}_{\text{incomplete}} * (\text{Path}_{\text{admitted}} / \text{Path}_{\text{non-admitted}}) \quad \text{Equation 8}$$

Where:

$\text{Path}_{\text{est}}$  = Number of patients on NHS waiting list that month who will require admitted care

$\text{Path}_{\text{incomplete}}$  = Number of patients on NHS waiting list that month whose pathways are incomplete

$\text{Path}_{\text{admitted}}$  = Number of patients who completed their pathway that month and whose treatment included admitted care

$\text{Path}_{\text{non-admitted}}$  = Number of patients who completed their pathway that month and whose treatment did not include admitted care

We made the following changes to the specialty categories to facilitate combination of NHS waiting list and pandemic shortfall estimates:

- We combined Gastroenterology with General Surgery.
- We combined Thoracic Medicine with Cardiothoracic Surgery.
- We excluded the following specialties from our calculations as they would not typically meet our definition for elective procedures: General Medicine, Dermatology, Neurology, Rheumatology, Geriatric Medicine, Other Medical Services, Other Mental Health Services, Other Paediatric Services, Other Services. Although some procedures that would be on the Oral Surgery waiting list are included in this study, the overwhelming majority of procedures are simple extractions that are excluded. Therefore we excluded the Oral Surgery figures from our calculations.
- Prior to 2022, the waiting list data included an 'Other' category. In the March 2022 data this was disaggregated in to five subcategories: one surgical [Other Surgical Services] and four non-surgical. We calculated the proportion of the 'Other' waiting list cases in March 2022 that were 'Other Surgical Services' and applied this

proportion to the totals for 'Other' waiting list cases in 2019 and earlier, to estimate 'Other Surgical Services' in those months. The estimates for pandemic shortfalls that we produced did not include an 'Other' category, so we distributed the 'Other' patients to the other (included) specialty categories in the waiting list data. Patients were distributed according to the proportion of the total waiting list (excluding 'Other') accounted for by each specialty.

### *Composition of NHS waiting list*

The NHS waiting list data are only publicly available at specialty-level. Therefore, in order to estimate total need in March 2022 at procedure-level we created estimates for the procedure-level composition of the NHS waiting list in December 2019 (Equation 3).

The AHES-APC dataset provides procedure-level data for:

- The number of elective procedures performed on patients admitted from waiting lists. Some elective procedures are planned rather than waiting list cases, meaning that the patient is given a procedure date at the time of booking (e.g. may happen for follow-up procedures).
- The mean number of days on the waiting list.

We used the 2018-19 AHES-APC data to multiply the number of waiting list admissions by their mean wait, to estimate at procedure-level an aggregated total for the number of days waited by patients for that procedure that year. Using the NHS waiting list data described above, we then calculated, at specialty-level, the proportion of the total waiting time within each specialty accounted for by each procedure. We then applied these proportions to the total number of patients on the NHS waiting list in December 2019 by specialty, to estimate the number of patients on the NHS waiting list in December 2019 at a procedure-level.

### **Estimated cost to address need for elective procedures**

We projected the cost to address the need for elective procedures based on the NHS reference costs for 2019-20<sup>12</sup>, the most recent available. NHS providers submit cost data to NHS England which calculates an average cost per care episode. Reference costs are provided by health resource group (HRG), a grouping similar treatment which require comparable healthcare resources. HRGs are determined by both the treatment a patient received and also their demographics (age) and comorbidities. There is no readily available cross-reference of HRGs against OPCS codes. Therefore, for each of the 130 procedures included in this study we identified the most appropriate HRG code. We aimed to produce a conservative estimate, therefore, when there was a choice of possible relevant HRG codes we selected the least expensive possibility. When applicable, we selected HRG codes for adult and those applying to patients with a comorbidity score of 1 (Supplementary Table 3). This process was completed by two investigators and any discrepancies were resolved through discussion.

We calculated the total cost for each procedure:

$$C_{TP} = N_P * C_P$$

**Equation 9**

Where:

$C_{TP}$  = Total cost for procedure group

$N_P$  = Total need per procedure

$C_P$  = Procedure-specific cost per procedure group

We summed procedure-level costs to calculate total specialty-level costs.

### ICS-level breakdown

In order to estimate a regional breakdown for need for elective procedures, NHS waiting list data for March 2022 was accessed at Integrated Care System (ICS) level<sup>7</sup>. The ICS structure will be formally introduced in July 2022. Each ICS brings together hospital providers with other health and social care bodies within a geographic region. There are 42 ICSs in England with their population ranging from half a million to three million. In addition, there is a separate waiting list for nationally commissioned services.

The ICS-level NHS waiting list data was available broken down by specialty. Specialties were included in the analysis as described above. In order to estimate the total need for surgery at ICS-level, the hidden waiting list was estimated for each specialty for each ICS plus the nationally commissioned services. This was achieved by calculating for each ICS the proportion of all patients on the national NHS waiting list for a particular specialty in that ICS (e.g. Dorset has 11,674 patients on the General Surgery NHS waiting list, accounting for 1.4% of all patients on the national General Surgery NHS waiting list). This proportion was then multiplied by the national estimate for the hidden waiting list for that specialty and added to the NHS waiting list figure to calculate total need (e.g. since the national hidden waiting list for General Surgery is 1,793,946 for Dorset this was multiplied by 1.4% and the result added to 11,674, resulting in an estimate of 25,208 General Surgery procedures needed in Dorset). This produced specialty-level estimates of total need for each of the 42 ICSs and also for nationally commissioned services.

It was assumed that for each specialty the waiting list for nationally commissioned services in each ICS would be proportionate to the waiting list for locally commissioned services. We calculated for each ICS the proportion of all patients on the national NHS waiting list for that specialty (excluding nationally commissioned services from the denominator). This proportion was then multiplied by the total for the relevant specialty for nationally commissioned services, and this was added to the existing estimate for need based on locally commissioned services to calculate an overall total need at specialty-level for each ICS. These figures were rounded to the nearest integer to allow easier interpretation.

For each ICS, specialty-level estimates for total need were summed to calculate an overall total need for elective procedures. To facilitate comparison across ICSs, the need for elective procedures was calculated per 1,000 population:

$$R_{ICS} = (N_{ICS} / P_{N_{ICS}}) * 1000$$

**Equation 10**

Where:

$R_{ICS}$  = Elective procedures needed in ICS per 1,000 population

$N_{ICS}$  = Total elective procedures needed in ICS

$P_{N_{ICS}}$  = ICS population in mid-2020

ICS-level projections for costs to address the need for elective procedures was calculated at specialty-level and summed to produce an overall figure. Using the national estimates, an

average cost per procedure was calculated for each specialty. For each specialty, this figure was multiplied by the number of procedures needed in each ICS to estimate cost for that specialty in that ICS. Costs were summed across all specialties in each ICS to calculate a total cost per ICS. To aid interpretation a cost per capita was calculated:

$$C_{capICS} = C_{ICS} / P_{nICS}$$

**Equation 11**

Where:

$C_{capICS}$  = Cost per capita to address the need for elective procedures in ICS

$C_{ICS}$  = Total cost to address the need for elective procedures in ICS

$P_{nICS}$  = ICS population in mid-2020

Data was also aggregated at a regional-level based on the seven regions defined by NHS England (East of England, London, Midlands, North East & Yorkshire, North West, South East, South West)

### **Forecasting total need to 2030**

We conducted an expert survey to ascertain expectations for the speed of recovery for elective services and the potential to expand beyond pre-pandemic volume. We used an anonymous online survey to collect responses from members of the CovidSurg research network. The survey instrument is included in Supplement 1. A total of 47 clinicians across 15 specialities submitted responses and the results are summarised in Supplementary Table 4.

Based on the results of the expert survey we have modelled four scenarios to estimate the number of people in England who will need elective procedures through to 2030.

These scenarios were

- Current capacity: surgical volume remains at the same level as in February-March 2022, from April 2022 up until January 2030.
- Pessimistic scenario: elective procedure volume gradually increases from current levels up to pre-pandemic levels by July 2023 followed by a plateauing of this rate through to January 2030.
- Central scenario: elective procedure volume returns to pre-pandemic levels by December 2022 followed by a 2% increase per year.
- Optimistic scenario: elective procedure volume returns to pre-pandemic levels by December 2022 followed by a 4% increase per year.

Scenarios were modelled on a monthly basis, with the total need for selective procedures calculated for each month between April 2022 and December 2029.

We also determined the monthly increase in surgical volume (assuming a constant rate of increase) required to fulfil the need for surgery and invasive diagnostics in full by January 2030.

## **Results**

We estimated the total need for elective procedures in England in March 2022 was 4,347,469. This is the highest need since at least 2007 (Figure 1). The greatest need was for General Surgery (35.0%, 1,522,366 of 4,347,469), Orthopaedics (22.5%, 976,875 of 4,347,469), and Ophthalmology (9.0%, 391,683 of 4,347,469, Table 1). There was substantial geographic variation (Figure 2), with the highest need in the South West (93.2 elective procedures needed per 100,000) followed by the North West (89.7 per 100,000), Midlands (83.9 per 100,000), South East (77.6 per 100,000), East of England (73.8 per 100,000), North East and Yorkshire (69.6 per 100,000), and London (56.7 per 100,000).

### *Hidden waiting list*

Of the 4,347,469 required elective procedures, 1,042,956 (24.0%) of patients were on the NHS waiting list and 3,304,513 (76.0%) were on a hidden waiting list. The largest hidden waiting lists were for General Surgery (1,289,440) and Orthopaedics (747,749).

### *Day-case procedures*

Overall, 84.9% (3,692,377 of 4,347,469) need was for day-case procedures. For six sub-specialties (Cardiology, Colorectal Surgery, Head & Neck Surgery, Oesophagogastric Surgery, Ophthalmology, Plastic Surgery) >95% of total need was for day-cases (Table 2).

### *Key procedures*

Overall, the greatest need was for sigmoidoscopy/ colonoscopy (568,838), gastroscopy (447,830), cataract surgery (314,790), lower limb joint replacement (224,363), and interventional cardiology (349,300). These top five procedures accounted for 39.3% of total need (1,710,274 of 4,347,469). The top 20 procedures (Table 3) accounted for 68.8% (2,992,395 of 4,347,469) of total need.

### *Projected cost to address need for elective procedures*

The projected cost to fully address the need for elective procedures was £9,207,798,071. The greatest costs were for Orthopaedics (£3,751,715,700), Urology (£722,558,421), and Head & Neck Surgery (£585,055,737, Table 4).

### *Surgical activity in February to March 2022*

The pre-pandemic baseline for the number of procedures expected in a two-month period was 953,390. We estimated that 810,674 elective procedures were performed in February to March 2022. This indicates a shortfall of 142,717 procedures, equivalent to 15.0% of pre-pandemic elective volume.

### *Forecasting total need for elective procedures to 2030*

We modelled that if age-sex specific incident need rates for elective procedures remain constant, based on ONS population projections in the seven years and nine months from April 2022 to December 2029, 47,957,079 elective procedures will be needed (Supplemental

Table 5), in addition to the existing pandemic shortfall of 4,347,469. Therefore, the total number of elective procedures that will be needed through to 2030 is 52,304,550.

We modelled that if surgical volume remains at current levels, the total number of elective procedures needed would increase to 14,608,195 by January 2030 (Figure 3). In the pessimistic scenario, if elective procedure volume gradually increases from current levels up to pre-pandemic levels by July 2023 followed by a plateauing of this rate, the total number of elective procedures needed would increase to 8,507,087 by January 2030. In the central scenario, if elective procedure volume returns to pre-pandemic levels by December 2022 followed by a 2% increase per year, the total number of elective procedures needed in January 2030 would be 5,420,999. Finally, in the optimistic scenario, if elective procedure volume returns to pre-pandemic levels by December 2022 followed by a 4% increase per year, 2,584,664 procedures would be needed in January 2030.

In order to fulfil the need for elective procedures in full by January 2030, elective procedure volume would need to increase by 8.4% (as a proportion of pre-pandemic volume) each year, reaching a maximum of 50% above the pre-pandemic baseline in January 2030.

## **Discussion**

We estimated that 4.3 million procedures were needed in England in March 2022. This is very considerably higher than the NHS waiting list; an estimated 3.3 million patients were on a hidden waiting list. Our projects suggest that the number of people needing elective procedures is likely to remain very considerably higher than the pre-pandemic waiting list peak until at least 2030. Unless elective procedure volume increases at least 2% above pre-pandemic levels each year, the number of people needing procedures will actually increase over time due to population growth and ageing. Based on our expert survey, the 8% annual increase in activity required to eliminate waiting lists even by 2030 is unlikely to be achievable.

### *Impact of waiting lists on population health*

The hidden waiting list includes people who need elective procedures and would have been referred and treated pre-pandemic. However, as a result of the pandemic these patients may have not sought medical attention. These patients will be delayed in receiving treatment and some will suffer worse health as a result. For example, patients with hip osteoarthritis needing a joint replacement are likely to experience increasing symptoms resulting in deterioration in their quality of life and their ability to complete their work and social activities. This in turn may in turn result in lifestyle changes. For patients with life threatening diseases such as cancer, delayed diagnosis and treatment could reduce chances of being successfully cured.

### *Inequalities in the need for elective procedures*

There is sharp variation in the overall need for elective procedures between England's regions, with the need in the South West being almost double that in London. At a sub-regional level there is variation between different integrated care systems, but we were not able to explore variation at a more granular postcode level. It is possible that some patients living in more deprived neighbourhoods and particularly vulnerable patients such as those with mental health conditions, refugees, and intravenous drug users may find it more difficult to navigate the process to get elective treatment at a time when health services are under particularly high pressure. Moreover, a shift from NHS to private provision in more affluent neighbourhoods could relieve some pressure on NHS services in those areas, whilst services in more deprived areas remain under heavy pressure. It is important that funding is awarded to integrated care systems according to their actual needs; this analysis suggests there is wide variation in per capita funding needs. Health equity impact assessments<sup>16</sup> should be conducted to ensure that planned initiatives to address the need for elective procedures are equitable both at national and local levels.

### *Strategies to address need for elective procedures*

As long waiting lists are likely to continue for the foreseeable future, difficult policy decisions are needed around the prioritisation and models of delivery for elective procedures. Consideration should be given to deprioritising procedures of lower clinical value, in order to release resources to focus on finding patients on the hidden waiting list who have serious disease requiring rapid treatment.



A key insight from this study is that most of the elective procedures needed are day-case procedures. This is likely to reflect the prioritisation of life saving surgery, such as cancer surgery, during the pandemic resulting in only small backlogs of major surgery. An important factor that could limit the ability to ramp up inpatient surgery is an ongoing pressure on general hospital beds in the NHS, particularly by high levels of emergency admissions. However, day-case procedures present greater flexibility in ramping up activity, since they are not dependent on availability of either general or intensive care beds. Initiatives such as high intensity theatre lists have been piloted to focus on high volume low complexity day-case activity<sup>17</sup>, though further research is needed to determine their optimum format. However, an important caveat to any focus on day-case activity is the need to tackle the orthopaedic backlog.

### *Strengths and limitations*

This is the first study to focus on the need for elective procedures and to provide granular breakdowns at specialty-level and procedure-level. Previous studies have focussed on the overall NHS England waiting list, but this overlooks the large heterogeneity of treatments that patients are waiting for<sup>9,18-20</sup>. The complexity of patient pathways for surgery, endoscopy, interventional cardiology and interventional radiology is far greater than for simpler treatments like drug infusions. Surgery, endoscopy, and interventional radiology all require specific suites equipped with expensive specialist machines, and staffed by highly trained multidisciplinary teams. Any initiative to increase elective procedure volume must therefore be carefully planned.

There are several limitations to this study. An assumption was made that the pre-pandemic NHS waiting list captured all patients who needed elective procedures, but it is likely that even pre-pandemic there were some patients who needed elective procedures who had not sought medical attention or had not been appropriately referred or listed. If this is the case, this would lead to us underestimating the current hidden waiting list and total need. NHS waiting list data is not fully cleaned. There may be some double counting of the same patient on different waiting lists, or the counting of patients who no longer require elective treatment, for example, because they have been admitted and treated as an emergency or because they have died. This would potentially result in a small over-estimation of the total need for elective procedures. However, because most of the total need is as a result of the pandemic shortfall, rather than the pre-pandemic NHS waiting list, the impact of inaccuracies in the NHS waiting list would be small overall.

We assumed that as waiting times for surgery increase there is no attrition to the need for surgery, but patients who would usually have been treated during the pandemic may no longer still need treatment; for example, if they have had successful non-operative treatment, have had spontaneous resolution of their underlying condition, or died. This would lead to an overestimation of the current need for surgery.

We assumed that age-sex specific incidence of symptoms of conditions requiring elective procedures would remain stable over time, but this may change as a result of wider social and economic circumstances, mediated through the wider determinants of health; for example, the need for cancer surgery is likely to grow if obesity rates continue to increase.

For our geographic analyses, we have assumed that the size of the hidden waiting list relative to the NHS waiting list is consistent across all NHS systems. If some systems have performed

better at capturing patients in need of procedures on their NHS waiting lists, we may be over-estimating their total need, whilst under-estimating need in other systems that have unexpectedly large hidden waiting lists. However, this would not impact the accuracy of national-level estimates.

## **References**

1. NHS England. Understanding Winter Pressures in A&E Departments. Accessed online on 14 June 2022 at <https://www.england.nhs.uk/wp-content/uploads/2013/11/wint-press-rep.pdf>.
2. NHS England. Cancelled Elective Operations Data. Accessed online on 14 June 2022 at <https://www.england.nhs.uk/statistics/statistical-work-areas/cancelled-elective-operations/cancelled-ops-data/>
3. COVIDSurg Collaborative. Global guidance for surgical care during the COVID-19 pandemic. *Br J Surg*. 2020 Aug;107(9):1097-1103.
4. COVIDSurg Collaborative. Elective surgery cancellations due to the COVID-19 pandemic: global predictive modelling to inform surgical recovery plans. *Br J Surg*. 2020 Oct;107(11):1440-1449.
5. Gregory A, Campbell D (2022, Apr 14). Covid disruption to NHS in England wreaks havoc with surgery backlog. *The Guardian*. Accessed online on 20 June 2022 at <https://www.theguardian.com/society/2022/apr/14/covid-disruption-to-nhs-in-england-wreaks-havoc-with-surgery-backlog>
6. COVIDSurg Collaborative. Projecting COVID-19 disruption to elective surgery. *Lancet*. 2022 Jan 15;399(10321):233-234.
7. NHS England. Consultant-led Referral to Treatment Waiting Times. Accessed online on 1 June 2022 at <https://www.england.nhs.uk/statistics/statistical-work-areas/rtt-waiting-times/>
8. NHS England (2022). Delivery plan for tackling the COVID-19 backlog of elective care. Accessed online on 11 June 2022 at <https://www.england.nhs.uk/coronavirus/wp-content/uploads/sites/52/2022/02/C1466-delivery-plan-for-tackling-the-covid-19-backlog-of-elective-care.pdf>
9. NHS Confederation. Reaching out to 7 million patients on ‘hidden’ waiting list requires a generational change. Accessed online on 20 June 2022 at <https://www.nhsconfed.org/news/reaching-out-7-million-patients-hidden-waiting-list-requires-generational-change>
10. COVIDSurg Collaborative, GlobalSurg Collaborative. Timing of surgery following SARS-CoV-2 infection: country income analysis. *Anaesthesia*. 2022 Jan;77(1):111-112.
11. NHS England. Hospital Episode Statistics (HES). Accessed online on 20 May 2022 at <https://digital.nhs.uk/data-and-information/data-tools-and-services/data-services/hospital-episode-statistics>
12. NHS England. National Cost Collection for the NHS. Accessed online on 20 May 2022 at <https://www.england.nhs.uk/costing-in-the-nhs/national-cost-collection/>
13. Office for National Statistics. Estimates of the population for the UK, England and Wales, Scotland and Northern Ireland. Accessed online on 20 May 2022 at <https://www.ons.gov.uk/peoplepopulationandcommunity/populationandmigration/populationestimates/datasets/populationestimatesforukenglandandwalesscotlandandnorthernireland>
14. Office for National Statistics. Principal projection - England population in age groups. Accessed online on 20 May 2022 at <https://www.ons.gov.uk/peoplepopulationandcommunity/populationandmigration/populationprojections/datasets/tablea24principalprojectionenglandpopulationinagegroups>
15. Office for National Statistics. Clinical commissioning group population estimates (National Statistics). Accessed online on 20 May 2022 at

- <https://www.ons.gov.uk/peoplepopulationandcommunity/populationandmigration/populationestimates/datasets/clinicalcommissioninggroupmidyearpopulationestimates>
16. Public Health England (2021). Health Equity Assessment Tool (HEAT): executive summary. <https://www.gov.uk/government/publications/health-equity-assessment-tool-heat/health-equity-assessment-tool-heat-executive-summary>
  17. Getting it Right First Time (2021). Elective Recovery High Volume Low Complexity (HVLC) guide for systems. Accessed online on 27 May 2022 at <https://www.gettingitrightfirsttime.co.uk/wp-content/uploads/2021/05/GIRFT-HVLC-Guide-Final-V6.pdf>
  18. British Medical Association. NHS backlog data analysis. Accessed online on 10 June 2022 at <https://www.bma.org.uk/advice-and-support/nhs-delivery-and-workforce/pressures/nhs-backlog-data-analysis>
  19. Stoye G, Warner M, Zaranko B. The NHS backlog recovery plan and the outlook for waiting lists. Accessed online on 10 June 2022 at <https://ifs.org.uk/publications/15941>
  20. Gardner T, Fraser C. Elective care: how has COVID-19 affected the waiting list? Accessed online on 10 June 2022 at <https://www.health.org.uk/news-and-comment/charts-and-infographics/elective-care-how-has-covid-19-affected-the-waiting-list>

**Table 1: Specialty-level breakdown of estimated total need for elective procedures in England and estimated hidden waiting list in March 2022**

| <b>Specialty</b>       | <b>Total need</b> | <b>Hidden waiting list</b> |
|------------------------|-------------------|----------------------------|
| General Surgery        | 1,522,366         | 1,289,440                  |
| Orthopaedics           | 976,875           | 747,749                    |
| Ophthalmology          | 391,683           | 168,361                    |
| Urology                | 385,971           | 284,279                    |
| Head & Neck surgery    | 332,281           | 263,447                    |
| Gynaecology            | 246,973           | 175,394                    |
| Plastic Surgery        | 231,333           | 182,570                    |
| Cardiology             | 154,453           | 109,479                    |
| Cardiothoracic Surgery | 88,865            | 76,286                     |
| Neurosurgery           | 16,669            | 7,508                      |
| <b>Total</b>           | <b>4,347,469</b>  | <b>3,304,513</b>           |

**Table 2: Sub-specialty-level breakdown of estimated total need for elective procedures in England in March 2022**

| <b>Sub-specialty</b>     | <b>Day-case</b>  | <b>Overnight admission</b> |
|--------------------------|------------------|----------------------------|
| Breast surgery           | 36,015           | 6,953                      |
| Cardiac surgery          | 1,433            | 27,395                     |
| Cardiology               | 152,762          | 1,691                      |
| Colorectal surgery       | 636,961          | 13,436                     |
| General surgery          | 144,944          | 29,348                     |
| Gynaecology              | 162,365          | 84,608                     |
| Head & Neck surgery      | 316,268          | 16,013                     |
| Hepatobiliary surgery    | 73,893           | 6,770                      |
| Neurosurgery             | 5,131            | 11,538                     |
| Oesophagogastric surgery | 447,254          | 22,891                     |
| Ophthalmology            | 390,328          | 1,355                      |
| Orthopaedics             | 657,797          | 319,078                    |
| Plastic surgery          | 227,140          | 4,193                      |
| Thoracic surgery         | 44,652           | 15,385                     |
| Urology                  | 317,910          | 68,061                     |
| Vascular surgery         | 77,524           | 26,377                     |
| <b>Total</b>             | <b>3,692,377</b> | <b>655,092</b>             |

**Table 3: Top 20 elective procedures by need in England in March 2022**

| Procedure name                                | Day-case | Overnight admission | Total   | Rank |
|-----------------------------------------------|----------|---------------------|---------|------|
| Sigmoidoscopy, colonoscopy                    | 568,886  | -                   | 568,838 | 1    |
| Gastroscopy                                   | 446,125  | 1,705               | 447,830 | 2    |
| Cataract surgery                              | 314,790  | -                   | 314,790 | 3    |
| Lower limb joint replacement                  | -        | 224,363             | 224,363 | 4    |
| Interventional cardiology                     | 152,762  | 1,691               | 154,453 | 5    |
| Ureteroscopy, cystoscopy & related procedures | 117,817  | 18,444              | 136,261 | 6    |
| Excision of lesion of skin                    | 128,131  | -                   | 128,131 | 7    |
| Operations on bladder                         | 90,486   | 23,263              | 113,749 | 8    |
| Procedures on peripheral nerves               | 105,915  | -                   | 105,915 | 9    |
| Operations on ear                             | 86,216   | 1,347               | 87,563  | 10   |
| Spinal nerve root procedure                   | 78,130   | -                   | 78,130  | 11   |
| Operations on nose                            | 77,855   | 4                   | 77,859  | 12   |
| Groin hernia repair                           | 76,792   | -                   | 76,792  | 13   |
| Arthroscopic procedures                       | 75,431   | -                   | 75,431  | 14   |
| Surgery on ligament, tendon, muscle           | 72,068   | 1,658               | 73,726  | 15   |
| Hysteroscopy & related procedures             | 68,744   | -                   | 68,744  | 16   |
| Other day-case spinal surgery                 | 68,697   | -                   | 68,697  | 17   |
| Division or excision of bone                  | 63,069   | 5,322               | 68,391  | 18   |
| Tonsillectomy                                 | 61,993   | -                   | 61,993  | 19   |
| Proctology                                    | 60,739   | -                   | 60,739  | 20   |

Total need for Sigmoidoscopy, colonoscopy is lower than day-case need as the need for overnight admissions for this procedure was calculated as -48

**Table 4: Projected cost to address need for elective procedures**

| <b>Sub-specialty</b>     | <b>Total cost</b>     |
|--------------------------|-----------------------|
| Breast surgery           | £221,703,319          |
| Cardiac surgery          | £318,800,210          |
| Cardiology               | £372,181,343          |
| Colorectal surgery       | £540,488,976          |
| General surgery          | £465,424,135          |
| Gynaecology              | £555,252,435          |
| Head & Neck surgery      | £585,055,737          |
| Hepatobiliary surgery    | £227,444,145          |
| Neurosurgery             | £130,995,974          |
| Oesophagogastric surgery | £335,191,264          |
| Ophthalmology            | £394,740,194          |
| Orthopaedics             | £3,751,715,700        |
| Plastic surgery          | £210,128,413          |
| Thoracic surgery         | £106,740,125          |
| Urology                  | £722,558,422          |
| Vascular surgery         | £269,377,678          |
| <b>Total</b>             | <b>£9,207,798,071</b> |



**Figure 1: Number of elective procedures needed in England (2015-2022)**

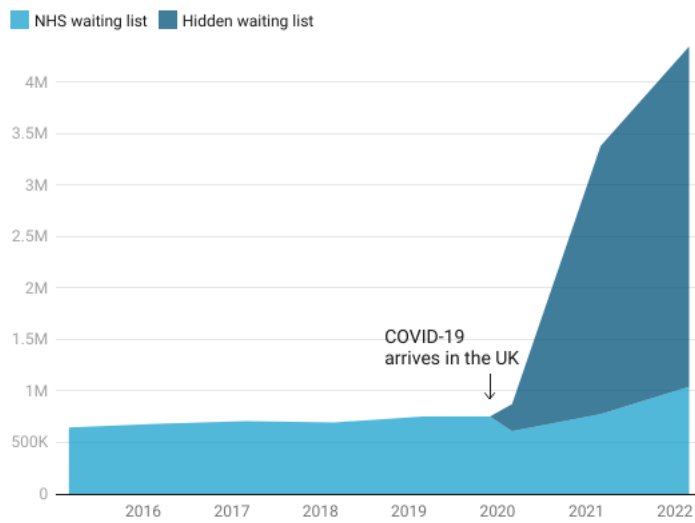

Estimates for number of elective procedures needed were based on analysis of Consultant-led Referral to Treatment Waiting Times as detailed in main text. Figure created in Datawrapper.

**Figure 2a: Total need for elective procedures in England per 1,000 population**

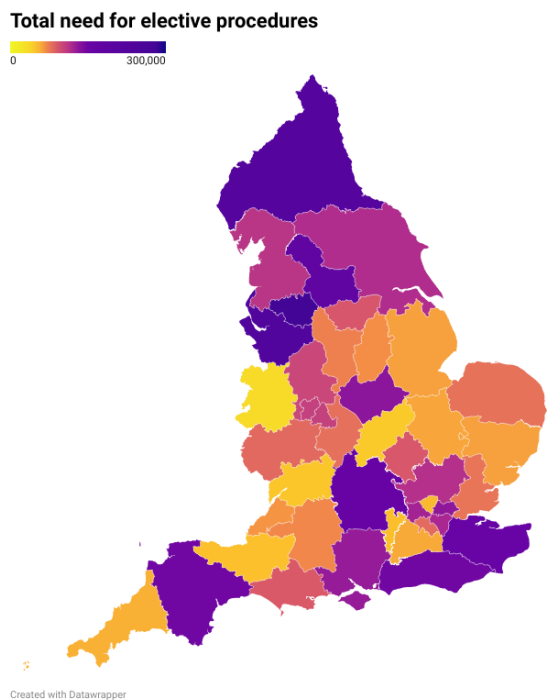

**Figure 2b: Total need for elective procedures in England per 1,000 population**

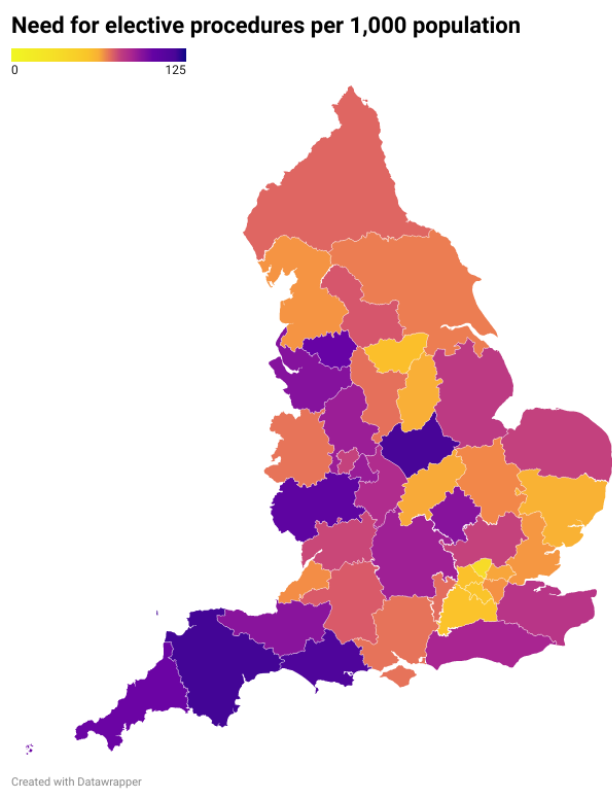

**Figure 3: Forecasts for total need for elective procedures in England in different scenarios**

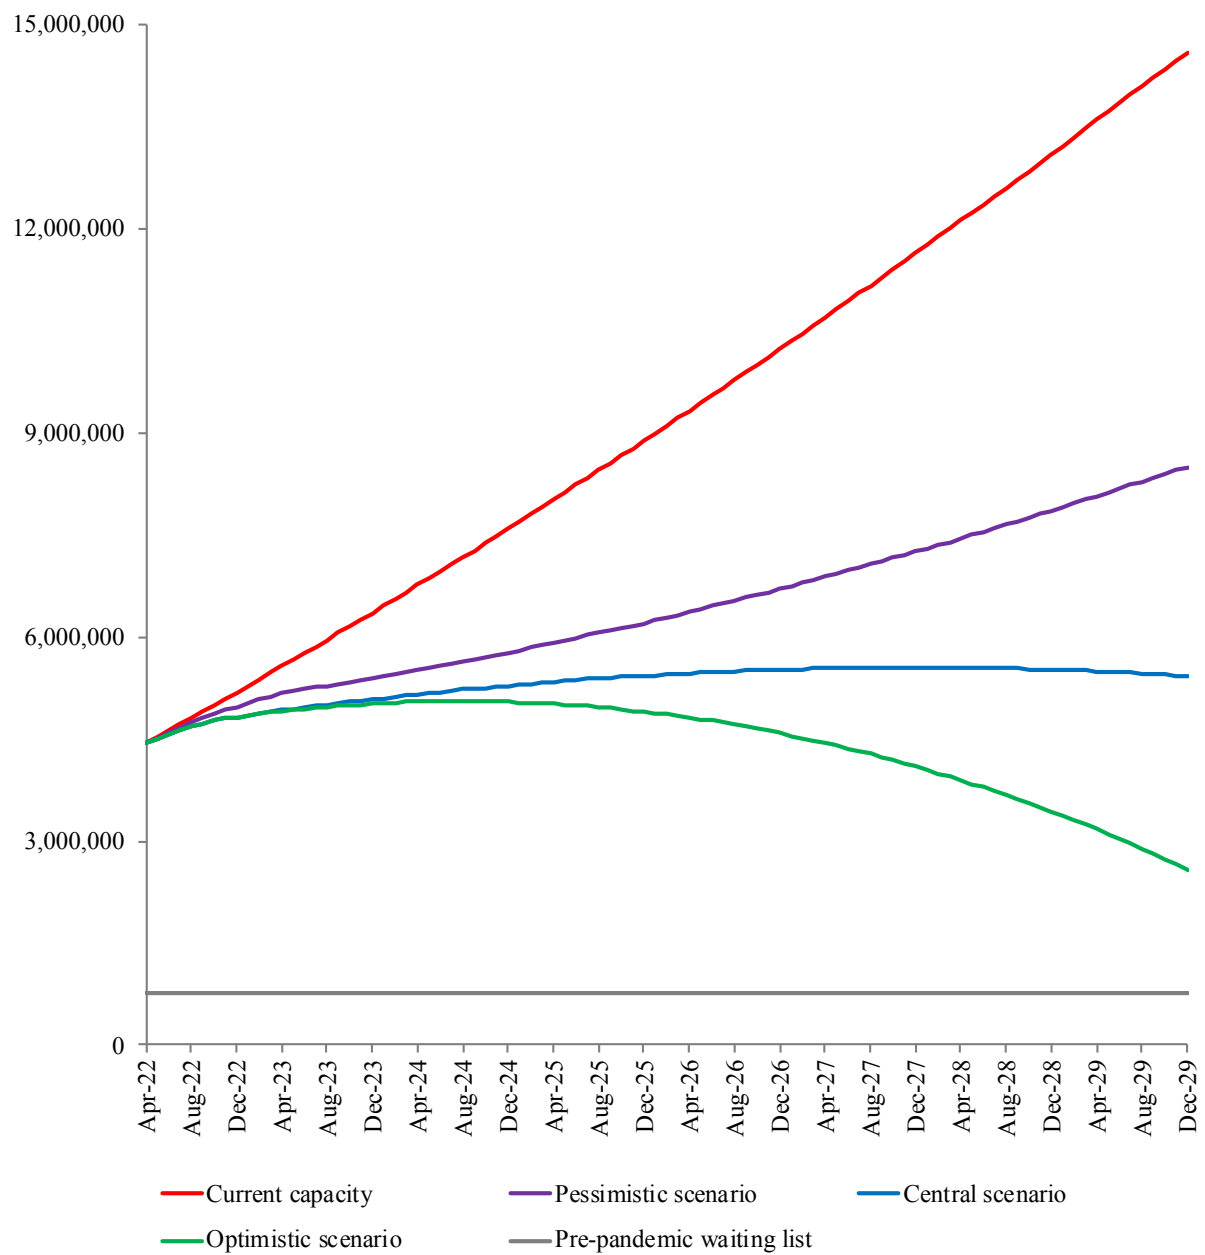

The pre-pandemic waiting list in December 2019 was 753,116. Data is tabulated in Supplemental Table 6. Figure created in Datawrapper.

**Supplemental Table 1: Categorisation of included OPCS codes**

| OPCS code | Procedure                                                                                 | Sub-specialty                   | Specialty       | Day-case surgery |
|-----------|-------------------------------------------------------------------------------------------|---------------------------------|-----------------|------------------|
| K13       | Transluminal repair of defect of septum                                                   | Interventional cardiology       | Cardiology      | No               |
| K16       | Other therapeutic transluminal operations on septum of heart                              | Interventional cardiology       | Cardiology      | No               |
| K35       | Therapeutic transluminal operations on valve of heart                                     | Interventional cardiology       | Cardiology      | No               |
| K49       | Transluminal balloon angioplasty of coronary artery                                       | Interventional cardiology       | Cardiology      | Yes              |
| K50       | Other therapeutic transluminal operations on coronary artery                              | Interventional cardiology       | Cardiology      | No               |
| K51       | Diagnostic transluminal operations on coronary artery                                     | Interventional cardiology       | Cardiology      | Yes              |
| K56       | Transluminal heart assist operations                                                      | Interventional cardiology       | Cardiology      | No               |
| K57       | Other therapeutic transluminal operations on heart                                        | Interventional cardiology       | Cardiology      | Yes              |
| K58       | Diagnostic transluminal operations on heart                                               | Interventional cardiology       | Cardiology      | Yes              |
| K59       | Cardioverter defibrillator introduced through the vein                                    | Interventional cardiology       | Cardiology      | Yes              |
| K60       | Cardiac pacemaker system introduced through vein                                          | Interventional cardiology       | Cardiology      | Yes              |
| K61       | Other cardiac pacemaker system                                                            | Interventional cardiology       | Cardiology      | Yes              |
| K62       | Therapeutic transluminal operations on heart                                              | Interventional cardiology       | Cardiology      | Yes              |
| K63       | Contrast radiology of heart                                                               | Interventional cardiology       | Cardiology      | Yes              |
| K65       | Catheterisation of heart                                                                  | Interventional cardiology       | Cardiology      | Yes              |
| K73       | Other cardiac pacemaker system introduced through vein                                    | Interventional cardiology       | Cardiology      | Yes              |
| K74       | Cardiac pacemaker system                                                                  | Interventional cardiology       | Cardiology      | Yes              |
| K75       | Percutaneous transluminal balloon angioplasty and insertion of stent into coronary artery | Interventional cardiology       | Cardiology      | Yes              |
| K76       | Transluminal operations on cardiac conduit                                                | Interventional cardiology       | Cardiology      | No               |
| K77       | Transluminal drainage of pericardium                                                      | Interventional cardiology       | Cardiology      | No               |
| L03       | Transluminal operations on abnormality of great vessel                                    | Interventional cardiology       | Cardiology      | No               |
| L13       | Transluminal operations on pulmonary artery                                               | Interventional cardiology       | Cardiology      | No               |
| K40       | Saphenous vein graft replacement of coronary artery                                       | Coronary artery surgery         | Cardiac surgery | No               |
| K41       | Other autograft replacement of coronary artery                                            | Coronary artery surgery         | Cardiac surgery | No               |
| K42       | Allograft replacement of coronary artery                                                  | Coronary artery surgery         | Cardiac surgery | Yes              |
| K43       | Prosthetic replacement of coronary artery                                                 | Coronary artery surgery         | Cardiac surgery | No               |
| K44       | Other replacement of coronary artery                                                      | Coronary artery surgery         | Cardiac surgery | No               |
| K45       | Connection of thoracic artery to coronary artery                                          | Coronary artery surgery         | Cardiac surgery | No               |
| K47       | Repair of coronary artery                                                                 | Coronary artery surgery         | Cardiac surgery | No               |
| K48       | Other open operations on coronary artery                                                  | Coronary artery surgery         | Cardiac surgery | No               |
| K64       | Percutaneous operations on heart                                                          | Other day-case cardiac surgery  | Cardiac surgery | Yes              |
| K66       | Other operations on heart                                                                 | Other day-case cardiac surgery  | Cardiac surgery | Yes              |
| E61       | Open operations on mediastinum                                                            | Other inpatient cardiac surgery | Cardiac surgery | No               |
| E62       | Therapeutic endoscopic operations on mediastinum                                          | Other inpatient cardiac surgery | Cardiac surgery | No               |
| K04       | Repair of tetralogy of Fallot                                                             | Other inpatient cardiac surgery | Cardiac surgery | No               |
| K07       | Correction of total anomalous pulmonary venous connection                                 | Other inpatient cardiac surgery | Cardiac surgery | No               |
| K08       | Repair of double outlet ventricle                                                         | Other inpatient cardiac surgery | Cardiac surgery | No               |
| K09       | Repair of defect of atrioventricular septum                                               | Other inpatient cardiac surgery | Cardiac surgery | No               |
| K10       | Repair of defect of interatrial septum                                                    | Other inpatient cardiac surgery | Cardiac surgery | No               |
| K11       | Repair of defect of interventricular septum                                               | Other inpatient cardiac surgery | Cardiac surgery | No               |
| K12       | Repair of defect of unspecified septum of heart                                           | Other inpatient cardiac surgery | Cardiac surgery | No               |
| K14       | Other open operations on septum of heart                                                  | Other inpatient cardiac surgery | Cardiac surgery | No               |
| K15       | Closed operations on septum of heart                                                      | Other inpatient cardiac surgery | Cardiac surgery | No               |
| K17       | Repair of univentricular heart                                                            | Other inpatient cardiac surgery | Cardiac surgery | No               |

|     |                                                                                                  |                                 |                 |                        |     |
|-----|--------------------------------------------------------------------------------------------------|---------------------------------|-----------------|------------------------|-----|
| K18 | Creation of valved cardiac conduit                                                               | Other inpatient cardiac surgery | Cardiac surgery | Cardiothoracic Surgery | No  |
| K19 | Creation of other cardiac conduit                                                                | Other inpatient cardiac surgery | Cardiac surgery | Cardiothoracic Surgery | No  |
| K20 | Refashioning of atrium                                                                           | Other inpatient cardiac surgery | Cardiac surgery | Cardiothoracic Surgery | No  |
| K22 | Other operations on wall of atrium                                                               | Other inpatient cardiac surgery | Cardiac surgery | Cardiothoracic Surgery | No  |
| K23 | Other operations of wall of heart                                                                | Other inpatient cardiac surgery | Cardiac surgery | Cardiothoracic Surgery | No  |
| K24 | Other operations on ventricles of heart                                                          | Other inpatient cardiac surgery | Cardiac surgery | Cardiothoracic Surgery | No  |
| K37 | Removal of obstruction from structure adjacent to valve of heart                                 | Other inpatient cardiac surgery | Cardiac surgery | Cardiothoracic Surgery | No  |
| K38 | Other operations on structure adjacent to valve of heart                                         | Other inpatient cardiac surgery | Cardiac surgery | Cardiothoracic Surgery | No  |
| K46 | Other bypass of coronary artery                                                                  | Other inpatient cardiac surgery | Cardiac surgery | Cardiothoracic Surgery | No  |
| K52 | Open operations on conducting system of heart                                                    | Other inpatient cardiac surgery | Cardiac surgery | Cardiothoracic Surgery | No  |
| K53 | Other incision of heart                                                                          | Other inpatient cardiac surgery | Cardiac surgery | Cardiothoracic Surgery | No  |
| K54 | Open heart assist operations                                                                     | Other inpatient cardiac surgery | Cardiac surgery | Cardiothoracic Surgery | No  |
| K55 | Other open operations on heart                                                                   | Other inpatient cardiac surgery | Cardiac surgery | Cardiothoracic Surgery | No  |
| K67 | Excision of pericardium                                                                          | Other inpatient cardiac surgery | Cardiac surgery | Cardiothoracic Surgery | No  |
| K68 | Drainage of pericardium                                                                          | Other inpatient cardiac surgery | Cardiac surgery | Cardiothoracic Surgery | No  |
| K69 | Incision of pericardium                                                                          | Other inpatient cardiac surgery | Cardiac surgery | Cardiothoracic Surgery | No  |
| K71 | Other operations on pericardium                                                                  | Other inpatient cardiac surgery | Cardiac surgery | Cardiothoracic Surgery | No  |
| L02 | Open correction of patent ductus arteriosus                                                      | Other inpatient cardiac surgery | Cardiac surgery | Cardiothoracic Surgery | No  |
| K05 | Atrial inversion operations for transposition of great arteries                                  | Surgery on the great vessels    | Cardiac surgery | Cardiothoracic Surgery | No  |
| K06 | Other repair of transposition of great arteries                                                  | Surgery on the great vessels    | Cardiac surgery | Cardiothoracic Surgery | No  |
| K33 | Operations on aortic root                                                                        | Surgery on the great vessels    | Cardiac surgery | Cardiothoracic Surgery | No  |
| L01 | Open operations for combined abnormality of great vessels                                        | Surgery on the great vessels    | Cardiac surgery | Cardiothoracic Surgery | No  |
| L04 | Open operations on pulmonary arterial tree                                                       | Surgery on the great vessels    | Cardiac surgery | Cardiothoracic Surgery | No  |
| L05 | Creation of shunt to pulmonary artery from aorta using interposition tube prosthesis             | Surgery on the great vessels    | Cardiac surgery | Cardiothoracic Surgery | No  |
| L06 | Other connection to pulmonary artery from aorta                                                  | Surgery on the great vessels    | Cardiac surgery | Cardiothoracic Surgery | No  |
| L07 | Creation of shunt to pulmonary artery from subclavian artery using interposition tube prosthesis | Surgery on the great vessels    | Cardiac surgery | Cardiothoracic Surgery | No  |
| L08 | Other connection to pulmonary artery from subclavian artery                                      | Surgery on the great vessels    | Cardiac surgery | Cardiothoracic Surgery | No  |
| L09 | Other connection to pulmonary artery                                                             | Surgery on the great vessels    | Cardiac surgery | Cardiothoracic Surgery | No  |
| L10 | Repair of pulmonary artery                                                                       | Surgery on the great vessels    | Cardiac surgery | Cardiothoracic Surgery | No  |
| L12 | Other open operations on pulmonary artery                                                        | Surgery on the great vessels    | Cardiac surgery | Cardiothoracic Surgery | No  |
| L77 | Connection of vena cava or branch of vena cava                                                   | Surgery on the great vessels    | Cardiac surgery | Cardiothoracic Surgery | No  |
| L79 | Other operations on vena cava                                                                    | Surgery on the great vessels    | Cardiac surgery | Cardiothoracic Surgery | Yes |
| L80 | Operations on individual pulmonary veins                                                         | Surgery on the great vessels    | Cardiac surgery | Cardiothoracic Surgery | No  |
| K01 | Transplantation of heart and lung                                                                | Transplant surgery              | Cardiac surgery | Cardiothoracic Surgery | No  |
| K02 | Other transplantation of heart                                                                   | Transplant surgery              | Cardiac surgery | Cardiothoracic Surgery | No  |
| K25 | Plastic repair of mitral valve                                                                   | Valvular heart surgery          | Cardiac surgery | Cardiothoracic Surgery | No  |

|     |                                                                                       |                                  |                  |                        |     |
|-----|---------------------------------------------------------------------------------------|----------------------------------|------------------|------------------------|-----|
| K26 | Plastic repair of aortic valve                                                        | Valvular heart surgery           | Cardiac surgery  | Cardiothoracic Surgery | No  |
| K27 | Plastic repair of tricuspid valve                                                     | Valvular heart surgery           | Cardiac surgery  | Cardiothoracic Surgery | No  |
| K28 | Plastic repair of pulmonary valve                                                     | Valvular heart surgery           | Cardiac surgery  | Cardiothoracic Surgery | No  |
| K29 | Plastic repair of unspecified valve of heart                                          | Valvular heart surgery           | Cardiac surgery  | Cardiothoracic Surgery | No  |
| K30 | Revision of plastic repair of valve of heart                                          | Valvular heart surgery           | Cardiac surgery  | Cardiothoracic Surgery | No  |
| K31 | Open incision of valve of heart                                                       | Valvular heart surgery           | Cardiac surgery  | Cardiothoracic Surgery | No  |
| K32 | Closed incision of valve of heart                                                     | Valvular heart surgery           | Cardiac surgery  | Cardiothoracic Surgery | No  |
| K34 | Other open operations on valve of heart                                               | Valvular heart surgery           | Cardiac surgery  | Cardiothoracic Surgery | No  |
| K36 | Excision of valve of heart                                                            | Valvular heart surgery           | Cardiac surgery  | Cardiothoracic Surgery | No  |
| E59 | Other operations on lung                                                              | Biopsy of lung                   | Thoracic surgery | Cardiothoracic Surgery | Yes |
| E49 | Diagnostic fibreoptic endoscopic examination of lower respiratory tract               | Bronchoscopy                     | Thoracic surgery | Cardiothoracic Surgery | Yes |
| E51 | Diagnostic endoscopic examination of lower respiratory tract using rigid bronchoscope | Bronchoscopy                     | Thoracic surgery | Cardiothoracic Surgery | No  |
| E63 | Diagnostic endoscopic examination of mediastinum                                      | Bronchoscopy                     | Thoracic surgery | Cardiothoracic Surgery | Yes |
| T10 | Therapeutic endoscopic operations on pleura                                           | Bronchoscopy                     | Thoracic surgery | Cardiothoracic Surgery | No  |
| E54 | Excision of lung                                                                      | Lung resection                   | Thoracic surgery | Cardiothoracic Surgery | No  |
| E67 | Other therapeutic fibreoptic endoscopic operations on lower respiratory tract         | Other day-case thoracic surgery  | Thoracic surgery | Cardiothoracic Surgery | Yes |
| T01 | Partial excision of chest wall                                                        | Other day-case thoracic surgery  | Thoracic surgery | Cardiothoracic Surgery | Yes |
| T14 | Other operations on pleura                                                            | Other day-case thoracic surgery  | Thoracic surgery | Cardiothoracic Surgery | Yes |
| E39 | Partial excision of trachea                                                           | Other inpatient thoracic surgery | Thoracic surgery | Cardiothoracic Surgery | No  |
| E40 | Plastic operations on trachea                                                         | Other inpatient thoracic surgery | Thoracic surgery | Cardiothoracic Surgery | No  |
| E41 | Open placement of prosthesis in trachea                                               | Other inpatient thoracic surgery | Thoracic surgery | Cardiothoracic Surgery | No  |
| E43 | Other open operations on trachea                                                      | Other inpatient thoracic surgery | Thoracic surgery | Cardiothoracic Surgery | No  |
| E44 | Open operations on carina                                                             | Other inpatient thoracic surgery | Thoracic surgery | Cardiothoracic Surgery | No  |
| E46 | Partial extirpation of bronchus                                                       | Other inpatient thoracic surgery | Thoracic surgery | Cardiothoracic Surgery | No  |
| E47 | Other open operations on bronchus                                                     | Other inpatient thoracic surgery | Thoracic surgery | Cardiothoracic Surgery | No  |
| E48 | Therapeutic fibreoptic endoscopic operations on lower respiratory tract               | Other inpatient thoracic surgery | Thoracic surgery | Cardiothoracic Surgery | No  |
| E50 | Therapeutic endoscopic operations on lower respiratory tract using rigid bronchoscope | Other inpatient thoracic surgery | Thoracic surgery | Cardiothoracic Surgery | No  |
| E52 | Other operations on bronchus                                                          | Other inpatient thoracic surgery | Thoracic surgery | Cardiothoracic Surgery | No  |
| E55 | Open extirpation of lesion of lung                                                    | Other inpatient thoracic surgery | Thoracic surgery | Cardiothoracic Surgery | No  |
| E57 | Other open operations on lung                                                         | Other inpatient thoracic surgery | Thoracic surgery | Cardiothoracic Surgery | No  |
| G23 | Repair of diaphragmatic hernia                                                        | Other inpatient thoracic surgery | Thoracic surgery | Cardiothoracic Surgery | No  |
| T02 | Reconstruction of chest wall                                                          | Other inpatient thoracic surgery | Thoracic surgery | Cardiothoracic Surgery | No  |
| T03 | Opening of chest                                                                      | Other inpatient thoracic surgery | Thoracic surgery | Cardiothoracic Surgery | No  |
| T05 | Other operations on chest wall                                                        | Other inpatient thoracic surgery | Thoracic surgery | Cardiothoracic Surgery | No  |
| T07 | Open excision of pleura                                                               | Other inpatient thoracic surgery | Thoracic surgery | Cardiothoracic Surgery | No  |
| T08 | Open drainage of pleural cavity                                                       | Other inpatient thoracic surgery | Thoracic surgery | Cardiothoracic Surgery | No  |

|     |                                             |                                   |                    |                        |     |
|-----|---------------------------------------------|-----------------------------------|--------------------|------------------------|-----|
| T09 | Other open operations on pleura             | Other inpatient thoracic surgery  | Thoracic surgery   | Cardiothoracic Surgery | No  |
| T11 | Diagnostic endoscopic examination of pleura | Other inpatient thoracic surgery  | Thoracic surgery   | Cardiothoracic Surgery | No  |
| T15 | Repair of rupture of diaphragm              | Other inpatient thoracic surgery  | Thoracic surgery   | Cardiothoracic Surgery | No  |
| T16 | Other repair of diaphragm                   | Other inpatient thoracic surgery  | Thoracic surgery   | Cardiothoracic Surgery | No  |
| T17 | Other operations on diaphragm               | Other inpatient thoracic surgery  | Thoracic surgery   | Cardiothoracic Surgery | No  |
| E53 | Transplantation of lung                     | Transplant surgery                | Thoracic surgery   | Cardiothoracic Surgery | No  |
| B27 | Total excision of breast                    | Excision of breast                | Breast surgery     | General Surgery        | No  |
| B28 | Other excision of breast                    | Excision of breast                | Breast surgery     | General Surgery        | Yes |
| B41 | Excision of breast                          | Excision of breast                | Breast surgery     | General Surgery        | Yes |
| B30 | Prosthesis for breast                       | Other day-case breast surgery     | Breast surgery     | General Surgery        | Yes |
| B31 | Other plastic operations on breast          | Other day-case breast surgery     | Breast surgery     | General Surgery        | Yes |
| B32 | Biopsy of breast                            | Other day-case breast surgery     | Breast surgery     | General Surgery        | Yes |
| B33 | Incision of breast                          | Other day-case breast surgery     | Breast surgery     | General Surgery        | Yes |
| B34 | Operations on duct of breast                | Other day-case breast surgery     | Breast surgery     | General Surgery        | Yes |
| B35 | Operations on nipple and areola             | Other day-case breast surgery     | Breast surgery     | General Surgery        | Yes |
| B36 | Reconstruction of nipple and areola         | Other day-case breast surgery     | Breast surgery     | General Surgery        | Yes |
| B37 | Other operations on breast                  | Other day-case breast surgery     | Breast surgery     | General Surgery        | Yes |
| B40 | Destruction of lesion of breast             | Other day-case breast surgery     | Breast surgery     | General Surgery        | Yes |
| B29 | Reconstruction of breast                    | Other inpatient breast surgery    | Breast surgery     | General Surgery        | No  |
| G49 | Excision of duodenum                        | Colorectal resection              | Colorectal surgery | General Surgery        | No  |
| G58 | Excision of jejunum                         | Colorectal resection              | Colorectal surgery | General Surgery        | No  |
| G69 | Excision of ileum                           | Colorectal resection              | Colorectal surgery | General Surgery        | No  |
| H04 | Total excision of colon and rectum          | Colorectal resection              | Colorectal surgery | General Surgery        | No  |
| H05 | Total excision of colon                     | Colorectal resection              | Colorectal surgery | General Surgery        | No  |
| H06 | Extended excision of right hemicolon        | Colorectal resection              | Colorectal surgery | General Surgery        | No  |
| H07 | Other excision of right hemicolon           | Colorectal resection              | Colorectal surgery | General Surgery        | No  |
| H08 | Excision of transverse colon                | Colorectal resection              | Colorectal surgery | General Surgery        | No  |
| H09 | Excision of left hemicolon                  | Colorectal resection              | Colorectal surgery | General Surgery        | No  |
| H10 | Excision of sigmoid colon                   | Colorectal resection              | Colorectal surgery | General Surgery        | No  |
| H11 | Other excision of colon                     | Colorectal resection              | Colorectal surgery | General Surgery        | No  |
| H29 | Subtotal excision of colon                  | Colorectal resection              | Colorectal surgery | General Surgery        | No  |
| H33 | Excision of rectum                          | Colorectal resection              | Colorectal surgery | General Surgery        | No  |
| H14 | Exteriorisation of caecum                   | Ileostomy, colostomy              | Colorectal surgery | General Surgery        | No  |
| H15 | Other exteriorisation of colon              | Ileostomy, colostomy              | Colorectal surgery | General Surgery        | No  |
| H32 | Exteriorisation of colon                    | Ileostomy, colostomy              | Colorectal surgery | General Surgery        | No  |
| G62 | Open endoscopic operations on jejunum       | Other day-case colorectal surgery | Colorectal surgery | General Surgery        | Yes |

|     |                                                              |                                    |                    |                 |     |
|-----|--------------------------------------------------------------|------------------------------------|--------------------|-----------------|-----|
| H18 | Open endoscopic operations on colon                          | Other day-case colorectal surgery  | Colorectal surgery | General Surgery | Yes |
| H19 | Other open operations on colon                               | Other day-case colorectal surgery  | Colorectal surgery | General Surgery | Yes |
| H30 | Other operations on colon                                    | Other day-case colorectal surgery  | Colorectal surgery | General Surgery | Yes |
| H40 | Operations on rectum through anal sphincter                  | Other day-case colorectal surgery  | Colorectal surgery | General Surgery | Yes |
| H41 | Other operations on rectum through anus                      | Other day-case colorectal surgery  | Colorectal surgery | General Surgery | Yes |
| H42 | Perineal operations for prolapse of rectum                   | Other day-case colorectal surgery  | Colorectal surgery | General Surgery | Yes |
| H46 | Other operations on rectum                                   | Other day-case colorectal surgery  | Colorectal surgery | General Surgery | Yes |
| H47 | Excision of anus                                             | Other day-case colorectal surgery  | Colorectal surgery | General Surgery | Yes |
| H62 | Other operations on bowel                                    | Other day-case colorectal surgery  | Colorectal surgery | General Surgery | Yes |
| H66 | Therapeutic operations on ileoanal pouch                     | Other day-case colorectal surgery  | Colorectal surgery | General Surgery | Yes |
| G71 | Bypass of ileum                                              | Other inpatient colorectal surgery | Colorectal surgery | General Surgery | No  |
| H02 | Other excision of appendix                                   | Other inpatient colorectal surgery | Colorectal surgery | General Surgery | No  |
| H03 | Other operations on appendix                                 | Other inpatient colorectal surgery | Colorectal surgery | General Surgery | No  |
| H12 | Extirpation of lesion of colon                               | Other inpatient colorectal surgery | Colorectal surgery | General Surgery | No  |
| H13 | Bypass of colon                                              | Other inpatient colorectal surgery | Colorectal surgery | General Surgery | No  |
| H16 | Incision of colon                                            | Other inpatient colorectal surgery | Colorectal surgery | General Surgery | No  |
| H17 | Intra-abdominal manipulation of colon                        | Other inpatient colorectal surgery | Colorectal surgery | General Surgery | No  |
| H34 | Open extirpation of lesion of rectum                         | Other inpatient colorectal surgery | Colorectal surgery | General Surgery | No  |
| H35 | Fixation of rectum for prolapse                              | Other inpatient colorectal surgery | Colorectal surgery | General Surgery | No  |
| H36 | Other abdominal operations for prolapse of rectum            | Other inpatient colorectal surgery | Colorectal surgery | General Surgery | No  |
| H50 | Repair of anus                                               | Other inpatient colorectal surgery | Colorectal surgery | General Surgery | No  |
| T37 | Operations on mesentery of small intestine                   | Other inpatient colorectal surgery | Colorectal surgery | General Surgery | No  |
| H31 | Image guided colorectal therapeutic operations               | Other interventional radiology     | Colorectal surgery | General Surgery | No  |
| H44 | Manipulation of rectum                                       | Proctology                         | Colorectal surgery | General Surgery | Yes |
| H48 | Excision of lesion of anus                                   | Proctology                         | Colorectal surgery | General Surgery | Yes |
| H49 | Destruction of lesion of anus                                | Proctology                         | Colorectal surgery | General Surgery | Yes |
| H51 | Excision of haemorrhoid                                      | Proctology                         | Colorectal surgery | General Surgery | Yes |
| H52 | Destruction of haemorrhoid                                   | Proctology                         | Colorectal surgery | General Surgery | Yes |
| H53 | Other operations on haemorrhoid                              | Proctology                         | Colorectal surgery | General Surgery | Yes |
| H54 | Dilation of anal sphincter                                   | Proctology                         | Colorectal surgery | General Surgery | Yes |
| H55 | Other operations on perianal region                          | Proctology                         | Colorectal surgery | General Surgery | Yes |
| H56 | Other operations on anus                                     | Proctology                         | Colorectal surgery | General Surgery | Yes |
| H57 | Other operations on the anal sphincter to control continence | Proctology                         | Colorectal surgery | General Surgery | Yes |
| H58 | Drainage through perineal region                             | Proctology                         | Colorectal surgery | General Surgery | Yes |
| H59 | Excision of pilonidal sinus                                  | Proctology                         | Colorectal surgery | General Surgery | Yes |
| H60 | Other operations on pilonidal sinus                          | Proctology                         | Colorectal surgery | General Surgery | Yes |



|     |                                                                                       |                                  |                    |                 |     |
|-----|---------------------------------------------------------------------------------------|----------------------------------|--------------------|-----------------|-----|
| H20 | Endoscopic extirpation of lesion of colon                                             | Sigmoidoscopy, colonoscopy       | Colorectal surgery | General Surgery | Yes |
| H21 | Other therapeutic endoscopic operations on colon                                      | Sigmoidoscopy, colonoscopy       | Colorectal surgery | General Surgery | Yes |
| H22 | Diagnostic endoscopic examination of colon                                            | Sigmoidoscopy, colonoscopy       | Colorectal surgery | General Surgery | Yes |
| H23 | Endoscopic extirpation of lesion of lower bowel using fibreoptic sigmoidoscope        | Sigmoidoscopy, colonoscopy       | Colorectal surgery | General Surgery | Yes |
| H24 | Other therapeutic endoscopic operations on lower bowel using fibreoptic sigmoidoscope | Sigmoidoscopy, colonoscopy       | Colorectal surgery | General Surgery | Yes |
| H25 | Diagnostic endoscopic examination of lower bowel using fibreoptic sigmoidoscope       | Sigmoidoscopy, colonoscopy       | Colorectal surgery | General Surgery | Yes |
| H26 | Endoscopic extirpation of lesion of sigmoid colon using rigid sigmoidoscope           | Sigmoidoscopy, colonoscopy       | Colorectal surgery | General Surgery | Yes |
| H27 | Other therapeutic endoscopic operations on sigmoid colon using rigid sigmoidoscope    | Sigmoidoscopy, colonoscopy       | Colorectal surgery | General Surgery | Yes |
| H28 | Diagnostic endoscopic examination of sigmoid colon using rigid sigmoidoscope          | Sigmoidoscopy, colonoscopy       | Colorectal surgery | General Surgery | Yes |
| H37 | Other endoscopic extirpation of lesion of sigmoid colon using rigid sigmoidoscope     | Sigmoidoscopy, colonoscopy       | Colorectal surgery | General Surgery | Yes |
| H68 | Diagnostic endoscopic examination of enteric pouch using colonoscope                  | Sigmoidoscopy, colonoscopy       | Colorectal surgery | General Surgery | Yes |
| H69 | Diagnostic endoscopic examination of enteric pouch using fibreoptic sigmoidoscope     | Sigmoidoscopy, colonoscopy       | Colorectal surgery | General Surgery | Yes |
| H70 | Diagnostic endoscopic examination of enteric pouch using rigid sigmoidoscope          | Sigmoidoscopy, colonoscopy       | Colorectal surgery | General Surgery | Yes |
| H71 | Therapeutic endoscopic operations on enteric pouch                                    | Sigmoidoscopy, colonoscopy       | Colorectal surgery | General Surgery | No  |
| J09 | Diagnostic endoscopic examination of liver using laparoscope                          | Diagnostic laparoscopy           | General surgery    | General Surgery | Yes |
| J51 | Laparoscopic ultrasound examination of bile duct                                      | Diagnostic laparoscopy           | General surgery    | General Surgery | Yes |
| J73 | Laparoscopic ultrasound examination of pancreas                                       | Diagnostic laparoscopy           | General surgery    | General Surgery | Yes |
| Q39 | Diagnostic endoscopic examination of fallopian tube                                   | Diagnostic laparoscopy           | General surgery    | General Surgery | Yes |
| Q50 | Diagnostic endoscopic examination of ovary                                            | Diagnostic laparoscopy           | General surgery    | General Surgery | Yes |
| T42 | Therapeutic endoscopic operations on peritoneum                                       | Diagnostic laparoscopy           | General surgery    | General Surgery | Yes |
| T43 | Diagnostic endoscopic examination of peritoneum                                       | Diagnostic laparoscopy           | General surgery    | General Surgery | Yes |
| T85 | Block dissection of lymph nodes                                                       | Excision of lymph node           | General surgery    | General Surgery | No  |
| T86 | Sampling of lymph nodes                                                               | Excision of lymph node           | General surgery    | General Surgery | Yes |
| T87 | Excision or biopsy of lymph node                                                      | Excision of lymph node           | General surgery    | General Surgery | Yes |
| T88 | Drainage of lesion of lymph node                                                      | Excision of lymph node           | General surgery    | General Surgery | Yes |
| T91 | Operations on sentinel lymph node                                                     | Excision of lymph node           | General surgery    | General Surgery | Yes |
| B08 | Excision of thyroid gland                                                             | Excision of thyroid, parathyroid | General surgery    | General Surgery | No  |
| B14 | Excision of parathyroid gland                                                         | Excision of thyroid, parathyroid | General surgery    | General Surgery | No  |
| T19 | Simple excision of inguinal hernial sac                                               | Groin hernia repair              | General surgery    | General Surgery | Yes |
| T20 | Primary repair of inguinal hernia                                                     | Groin hernia repair              | General surgery    | General Surgery | Yes |
| T21 | Repair of recurrent inguinal hernia                                                   | Groin hernia repair              | General surgery    | General Surgery | Yes |
| T22 | Primary repair of femoral hernia                                                      | Groin hernia repair              | General surgery    | General Surgery | Yes |
| T23 | Repair of recurrent femoral hernia                                                    | Groin hernia repair              | General surgery    | General Surgery | Yes |
| B12 | Other operations on thyroid gland                                                     | Other day-case endocrine surgery | General surgery    | General Surgery | Yes |
| B23 | Operations on aberrant adrenal tissue                                                 | Other day-case endocrine surgery | General surgery    | General Surgery | Yes |
| B25 | Other operations on adrenal gland                                                     | Other day-case endocrine surgery | General surgery    | General Surgery | Yes |

|     |                                                 |                                   |                 |                 |     |
|-----|-------------------------------------------------|-----------------------------------|-----------------|-----------------|-----|
| T29 | Operations on umbilicus                         | Other day-case general surgery    | General surgery | General Surgery | Yes |
| T31 | Other operations on anterior abdominal wall     | Other day-case general surgery    | General surgery | General Surgery | Yes |
| T48 | Other operations on peritoneum                  | Other day-case general surgery    | General surgery | General Surgery | Yes |
| T51 | Excision of fascia of abdomen                   | Other day-case general surgery    | General surgery | General Surgery | Yes |
| T92 | Other operations on lymphatic tissue            | Other day-case general surgery    | General surgery | General Surgery | Yes |
| T96 | Other operations on soft tissue                 | Other day-case general surgery    | General surgery | General Surgery | Yes |
| X03 | Replantation of other organ                     | Other day-case general surgery    | General surgery | General Surgery | Yes |
| X55 | Other operations on unspecified organ           | Other day-case general surgery    | General surgery | General Surgery | Yes |
| B01 | Excision of pituitary gland                     | Other inpatient endocrine surgery | General surgery | General Surgery | No  |
| B02 | Destruction of pituitary gland                  | Other inpatient endocrine surgery | General surgery | General Surgery | No  |
| B04 | Other operations on pituitary gland             | Other inpatient endocrine surgery | General surgery | General Surgery | No  |
| B06 | Operations on pineal gland                      | Other inpatient endocrine surgery | General surgery | General Surgery | No  |
| B09 | Operations on aberrant thyroid tissue           | Other inpatient endocrine surgery | General surgery | General Surgery | No  |
| B10 | Operations on thyroglossal tissue               | Other inpatient endocrine surgery | General surgery | General Surgery | No  |
| B16 | Other operations on parathyroid gland           | Other inpatient endocrine surgery | General surgery | General Surgery | No  |
| B18 | Excision of thymus gland                        | Other inpatient endocrine surgery | General surgery | General Surgery | No  |
| B20 | Other operations on thymus gland                | Other inpatient endocrine surgery | General surgery | General Surgery | No  |
| B22 | Excision of adrenal gland                       | Other inpatient endocrine surgery | General surgery | General Surgery | No  |
| H01 | Emergency excision of appendix                  | Other inpatient general surgery   | General surgery | General Surgery | No  |
| J72 | Other operations on spleen                      | Other inpatient general surgery   | General surgery | General Surgery | No  |
| T28 | Other repair of anterior abdominal wall         | Other inpatient general surgery   | General surgery | General Surgery | No  |
| T30 | Opening of abdomen                              | Other inpatient general surgery   | General surgery | General Surgery | No  |
| T32 | Reconstruction of anterior abdominal wall       | Other inpatient general surgery   | General surgery | General Surgery | No  |
| T33 | Open extirpation of lesion of peritoneum        | Other inpatient general surgery   | General surgery | General Surgery | No  |
| T34 | Open drainage of peritoneum                     | Other inpatient general surgery   | General surgery | General Surgery | No  |
| T38 | Operations on mesentery of colon                | Other inpatient general surgery   | General surgery | General Surgery | No  |
| T39 | Operations on posterior peritoneum              | Other inpatient general surgery   | General surgery | General Surgery | No  |
| T41 | Other open operations on peritoneum             | Other inpatient general surgery   | General surgery | General Surgery | No  |
| T50 | Transplantation of fascia                       | Other inpatient general surgery   | General surgery | General Surgery | No  |
| T89 | Operations on lymphatic duct                    | Other inpatient general surgery   | General surgery | General Surgery | No  |
| X14 | Clearance of pelvis                             | Other inpatient general surgery   | General surgery | General Surgery | No  |
| X17 | Separation of conjoined twins                   | Other inpatient general surgery   | General surgery | General Surgery | No  |
| X46 | Donation of other tissue                        | Other inpatient general surgery   | General surgery | General Surgery | No  |
| T45 | Image controlled operations on abdominal cavity | Other interventional radiology    | General surgery | General Surgery | No  |
| T90 | Contrast radiology of lymphatic tissue          | Other interventional radiology    | General surgery | General Surgery | Yes |
| B17 | Transplantation of thymus gland                 | Transplant surgery                | General surgery | General Surgery | No  |

|     |                                                                               |                                             |                       |                 |     |
|-----|-------------------------------------------------------------------------------|---------------------------------------------|-----------------------|-----------------|-----|
| X04 | Transplantation between systems                                               | Transplant surgery                          | General surgery       | General Surgery | Yes |
| X45 | Donation of organ                                                             | Transplant surgery                          | General surgery       | General Surgery | No  |
| T24 | Primary repair of umbilical hernia                                            | Ventral hernia repair                       | General surgery       | General Surgery | Yes |
| T25 | Primary repair of incisional hernia                                           | Ventral hernia repair                       | General surgery       | General Surgery | No  |
| T26 | Repair of recurrent incisional hernia                                         | Ventral hernia repair                       | General surgery       | General Surgery | No  |
| T27 | Repair of other hernia of abdominal wall                                      | Ventral hernia repair                       | General surgery       | General Surgery | Yes |
| T97 | Repair of recurrent umbilical hernia                                          | Ventral hernia repair                       | General surgery       | General Surgery | Yes |
| T98 | Repair of recurrent other hernia of abdominal wall                            | Ventral hernia repair                       | General surgery       | General Surgery | Yes |
| J18 | Excision of gall bladder                                                      | Cholecystectomy                             | Hepatobiliary surgery | General Surgery | Yes |
| J13 | Diagnostic percutaneous operations on liver                                   | Diagnostic percutaneous operations on liver | Hepatobiliary surgery | General Surgery | Yes |
| J17 | Endoscopic ultrasound examination of liver                                    | ERCP & related procedures                   | Hepatobiliary surgery | General Surgery | Yes |
| J38 | Endoscopic incision of sphincter of Oddi                                      | ERCP & related procedures                   | Hepatobiliary surgery | General Surgery | Yes |
| J39 | Other therapeutic endoscopic operations on ampulla of Vater                   | ERCP & related procedures                   | Hepatobiliary surgery | General Surgery | Yes |
| J40 | Endoscopic retrograde placement of prosthesis in bile duct                    | ERCP & related procedures                   | Hepatobiliary surgery | General Surgery | No  |
| J41 | Other therapeutic endoscopic retrograde operations on bile duct               | ERCP & related procedures                   | Hepatobiliary surgery | General Surgery | Yes |
| J42 | Therapeutic endoscopic retrograde operations on pancreatic duct               | ERCP & related procedures                   | Hepatobiliary surgery | General Surgery | No  |
| J43 | Diagnostic endoscopic retrograde examination of bile duct and pancreatic duct | ERCP & related procedures                   | Hepatobiliary surgery | General Surgery | Yes |
| J44 | Diagnostic endoscopic retrograde examination of bile duct                     | ERCP & related procedures                   | Hepatobiliary surgery | General Surgery | Yes |
| J45 | Diagnostic endoscopic retrograde examination of pancreatic duct               | ERCP & related procedures                   | Hepatobiliary surgery | General Surgery | Yes |
| J49 | Therapeutic operations on bile duct along T tube track                        | ERCP & related procedures                   | Hepatobiliary surgery | General Surgery | No  |
| J53 | Endoscopic ultrasound examination of bile duct                                | ERCP & related procedures                   | Hepatobiliary surgery | General Surgery | Yes |
| J74 | Endoscopic ultrasound examination of pancreas                                 | ERCP & related procedures                   | Hepatobiliary surgery | General Surgery | Yes |
| J02 | Partial excision of liver                                                     | Excision of liver, pancreas, spleen         | Hepatobiliary surgery | General Surgery | No  |
| J55 | Total excision of pancreas                                                    | Excision of liver, pancreas, spleen         | Hepatobiliary surgery | General Surgery | No  |
| J56 | Excision of head of pancreas                                                  | Excision of liver, pancreas, spleen         | Hepatobiliary surgery | General Surgery | No  |
| J57 | Other partial excision of pancreas                                            | Excision of liver, pancreas, spleen         | Hepatobiliary surgery | General Surgery | No  |
| J69 | Total excision of spleen                                                      | Excision of liver, pancreas, spleen         | Hepatobiliary surgery | General Surgery | No  |
| J70 | Other excision of spleen                                                      | Excision of liver, pancreas, spleen         | Hepatobiliary surgery | General Surgery | No  |
| J16 | Other operations on liver                                                     | Other day-case hepatobiliary surgery        | Hepatobiliary surgery | General Surgery | Yes |
| J19 | Connection of gall bladder                                                    | Other day-case hepatobiliary surgery        | Hepatobiliary surgery | General Surgery | Yes |
| J23 | Other open operations on gall bladder                                         | Other day-case hepatobiliary surgery        | Hepatobiliary surgery | General Surgery | Yes |
| J26 | Other operations on gall bladder                                              | Other day-case hepatobiliary surgery        | Hepatobiliary surgery | General Surgery | Yes |
| J31 | Open introduction of prosthesis into bile duct                                | Other day-case hepatobiliary surgery        | Hepatobiliary surgery | General Surgery | Yes |
| J34 | Plastic repair of sphincter of Oddi using duodenal approach                   | Other day-case hepatobiliary surgery        | Hepatobiliary surgery | General Surgery | Yes |
| J36 | Other operations on ampulla of Vater using duodenal approach                  | Other day-case hepatobiliary surgery        | Hepatobiliary surgery | General Surgery | Yes |
| J37 | Other open operations on bile duct                                            | Other day-case hepatobiliary surgery        | Hepatobiliary surgery | General Surgery | Yes |

|     |                                                                     |                                       |                       |                 |     |
|-----|---------------------------------------------------------------------|---------------------------------------|-----------------------|-----------------|-----|
| J60 | Other open operations on pancreatic duct                            | Other day-case hepatobiliary surgery  | Hepatobiliary surgery | General Surgery | Yes |
| J63 | Open examination of pancreas                                        | Other day-case hepatobiliary surgery  | Hepatobiliary surgery | General Surgery | Yes |
| J68 | Other operations on pancreas                                        | Other day-case hepatobiliary surgery  | Hepatobiliary surgery | General Surgery | Yes |
| J03 | Extirpation of lesion of liver                                      | Other inpatient hepatobiliary surgery | Hepatobiliary surgery | General Surgery | No  |
| J04 | Repair of liver                                                     | Other inpatient hepatobiliary surgery | Hepatobiliary surgery | General Surgery | No  |
| J05 | Incision of liver                                                   | Other inpatient hepatobiliary surgery | Hepatobiliary surgery | General Surgery | No  |
| J07 | Other open operations on liver                                      | Other inpatient hepatobiliary surgery | Hepatobiliary surgery | General Surgery | No  |
| J08 | Therapeutic endoscopic operations on liver using laparoscope        | Other inpatient hepatobiliary surgery | Hepatobiliary surgery | General Surgery | No  |
| J20 | Repair of gall bladder                                              | Other inpatient hepatobiliary surgery | Hepatobiliary surgery | General Surgery | No  |
| J21 | Incision of gall bladder                                            | Other inpatient hepatobiliary surgery | Hepatobiliary surgery | General Surgery | No  |
| J27 | Excision of bile duct                                               | Other inpatient hepatobiliary surgery | Hepatobiliary surgery | General Surgery | No  |
| J28 | Extirpation of lesion of bile duct                                  | Other inpatient hepatobiliary surgery | Hepatobiliary surgery | General Surgery | No  |
| J29 | Connection of hepatic duct                                          | Other inpatient hepatobiliary surgery | Hepatobiliary surgery | General Surgery | No  |
| J30 | Connection of common bile duct                                      | Other inpatient hepatobiliary surgery | Hepatobiliary surgery | General Surgery | No  |
| J32 | Repair of bile duct                                                 | Other inpatient hepatobiliary surgery | Hepatobiliary surgery | General Surgery | No  |
| J33 | Incision of bile duct                                               | Other inpatient hepatobiliary surgery | Hepatobiliary surgery | General Surgery | No  |
| J35 | Incision of sphincter of Oddi using duodenal approach               | Other inpatient hepatobiliary surgery | Hepatobiliary surgery | General Surgery | No  |
| J52 | Other operations on bile duct                                       | Other inpatient hepatobiliary surgery | Hepatobiliary surgery | General Surgery | No  |
| J58 | Extirpation of lesion of pancreas                                   | Other inpatient hepatobiliary surgery | Hepatobiliary surgery | General Surgery | No  |
| J59 | Connection of pancreatic duct                                       | Other inpatient hepatobiliary surgery | Hepatobiliary surgery | General Surgery | No  |
| J61 | Open drainage of lesion of pancreas                                 | Other inpatient hepatobiliary surgery | Hepatobiliary surgery | General Surgery | No  |
| J62 | Incision of pancreas                                                | Other inpatient hepatobiliary surgery | Hepatobiliary surgery | General Surgery | No  |
| J65 | Other open operations on pancreas                                   | Other inpatient hepatobiliary surgery | Hepatobiliary surgery | General Surgery | No  |
| J06 | Other transjugular intrahepatic operations on blood vessel of liver | Other interventional radiology        | Hepatobiliary surgery | General Surgery | No  |
| J10 | Transluminal operations on blood vessel of liver                    | Other interventional radiology        | Hepatobiliary surgery | General Surgery | No  |
| J11 | Transjugular intrahepatic operations on blood vessel of liver       | Other interventional radiology        | Hepatobiliary surgery | General Surgery | No  |
| J12 | Other therapeutic percutaneous operations on liver                  | Other interventional radiology        | Hepatobiliary surgery | General Surgery | No  |
| J14 | Other puncture of liver                                             | Other interventional radiology        | Hepatobiliary surgery | General Surgery | Yes |
| J15 | Transluminal insertion of prosthesis into blood vessel of liver     | Other interventional radiology        | Hepatobiliary surgery | General Surgery | No  |
| J24 | Therapeutic percutaneous operations on gall bladder                 | Other interventional radiology        | Hepatobiliary surgery | General Surgery | No  |
| J25 | Diagnostic percutaneous operations on gall bladder                  | Other interventional radiology        | Hepatobiliary surgery | General Surgery | Yes |
| J46 | Therapeutic percutaneous attention to connection of bile duct       | Other interventional radiology        | Hepatobiliary surgery | General Surgery | No  |
| J47 | Therapeutic percutaneous insertion of prosthesis into bile duct     | Other interventional radiology        | Hepatobiliary surgery | General Surgery | No  |
| J48 | Other therapeutic percutaneous operations on bile duct              | Other interventional radiology        | Hepatobiliary surgery | General Surgery | No  |
| J50 | Percutaneous examination of bile duct                               | Other interventional radiology        | Hepatobiliary surgery | General Surgery | No  |
| J66 | Therapeutic percutaneous operations on pancreas                     | Other interventional radiology        | Hepatobiliary surgery | General Surgery | No  |

|     |                                                                                    |                                         |                          |                 |     |
|-----|------------------------------------------------------------------------------------|-----------------------------------------|--------------------------|-----------------|-----|
| J67 | Diagnostic percutaneous operations on pancreas                                     | Other interventional radiology          | Hepatobiliary surgery    | General Surgery | Yes |
| J77 | Other transluminal operations on blood vessel of liver                             | Other interventional radiology          | Hepatobiliary surgery    | General Surgery | No  |
| J01 | Transplantation of liver                                                           | Transplant surgery                      | Hepatobiliary surgery    | General Surgery | No  |
| J54 | Transplantation of pancreas                                                        | Transplant surgery                      | Hepatobiliary surgery    | General Surgery | No  |
| G12 | Other fibreoptic endoscopic extirpation of lesion of oesophagus                    | Gastroscopy                             | Oesophagogastric surgery | General Surgery | Yes |
| G14 | Fibreoptic endoscopic extirpation of lesion of oesophagus                          | Gastroscopy                             | Oesophagogastric surgery | General Surgery | Yes |
| G15 | Other therapeutic fibreoptic endoscopic operations on oesophagus                   | Gastroscopy                             | Oesophagogastric surgery | General Surgery | Yes |
| G16 | Diagnostic fibreoptic endoscopic examination of oesophagus                         | Gastroscopy                             | Oesophagogastric surgery | General Surgery | Yes |
| G17 | Endoscopic extirpation of lesion of oesophagus using rigid oesophagoscope          | Gastroscopy                             | Oesophagogastric surgery | General Surgery | Yes |
| G18 | Other therapeutic endoscopic operations on oesophagus using rigid oesophagoscope   | Gastroscopy                             | Oesophagogastric surgery | General Surgery | Yes |
| G19 | Diagnostic endoscopic examination of oesophagus using rigid oesophagoscope         | Gastroscopy                             | Oesophagogastric surgery | General Surgery | Yes |
| G20 | Therapeutic fibreoptic endoscopic operations on oesophagus                         | Gastroscopy                             | Oesophagogastric surgery | General Surgery | No  |
| G21 | Other operations on oesophagus                                                     | Gastroscopy                             | Oesophagogastric surgery | General Surgery | Yes |
| G42 | Other fibreoptic endoscopic extirpation of lesion of upper gastrointestinal tract  | Gastroscopy                             | Oesophagogastric surgery | General Surgery | Yes |
| G43 | Fibreoptic endoscopic extirpation of lesion of upper gastrointestinal tract        | Gastroscopy                             | Oesophagogastric surgery | General Surgery | Yes |
| G44 | Other therapeutic fibreoptic endoscopic operations on upper gastrointestinal tract | Gastroscopy                             | Oesophagogastric surgery | General Surgery | Yes |
| G45 | Diagnostic fibreoptic endoscopic examination of upper gastrointestinal tract       | Gastroscopy                             | Oesophagogastric surgery | General Surgery | Yes |
| G46 | Therapeutic fibreoptic endoscopic operations on upper gastrointestinal tract       | Gastroscopy                             | Oesophagogastric surgery | General Surgery | No  |
| G54 | Therapeutic endoscopic operations on duodenum                                      | Gastroscopy                             | Oesophagogastric surgery | General Surgery | Yes |
| G55 | Diagnostic endoscopic examination of duodenum                                      | Gastroscopy                             | Oesophagogastric surgery | General Surgery | Yes |
| G64 | Therapeutic endoscopic operations on jejunum                                       | Gastroscopy                             | Oesophagogastric surgery | General Surgery | No  |
| G65 | Diagnostic endoscopic examination of jejunum                                       | Gastroscopy                             | Oesophagogastric surgery | General Surgery | Yes |
| G79 | Therapeutic endoscopic operations on ileum                                         | Gastroscopy                             | Oesophagogastric surgery | General Surgery | Yes |
| G80 | Diagnostic endoscopic examination of ileum                                         | Gastroscopy                             | Oesophagogastric surgery | General Surgery | Yes |
| G34 | Artificial opening into stomach                                                    | Gastrostomy, jejunostomy                | Oesophagogastric surgery | General Surgery | No  |
| G60 | Artificial opening into jejunum                                                    | Gastrostomy, jejunostomy                | Oesophagogastric surgery | General Surgery | No  |
| G74 | Creation of artificial opening into ileum                                          | Ileostomy, colostomy                    | Oesophagogastric surgery | General Surgery | No  |
| G75 | Attention to artificial opening into ileum                                         | Ileostomy, colostomy                    | Oesophagogastric surgery | General Surgery | No  |
| G01 | Excision of oesophagus and stomach                                                 | Oesophagogastric resection              | Oesophagogastric surgery | General Surgery | No  |
| G02 | Total excision of oesophagus                                                       | Oesophagogastric resection              | Oesophagogastric surgery | General Surgery | No  |
| G03 | Partial excision of oesophagus                                                     | Oesophagogastric resection              | Oesophagogastric surgery | General Surgery | No  |
| G27 | Total excision of stomach                                                          | Oesophagogastric resection              | Oesophagogastric surgery | General Surgery | No  |
| G28 | Partial excision of stomach                                                        | Oesophagogastric resection              | Oesophagogastric surgery | General Surgery | No  |
| G10 | Open operations on varices of oesophagus                                           | Other day-case oesophagogastric surgery | Oesophagogastric surgery | General Surgery | Yes |
| G30 | Plastic operations on stomach                                                      | Other day-case oesophagogastric surgery | Oesophagogastric surgery | General Surgery | Yes |
| G48 | Other operations on stomach                                                        | Other day-case oesophagogastric surgery | Oesophagogastric surgery | General Surgery | Yes |

|     |                                             |                                          |                          |                 |     |
|-----|---------------------------------------------|------------------------------------------|--------------------------|-----------------|-----|
| G67 | Other operations on jejunum                 | Other day-case oesophagogastric surgery  | Oesophagogastric surgery | General Surgery | Yes |
| T36 | Operations on omentum                       | Other day-case oesophagogastric surgery  | Oesophagogastric surgery | General Surgery | Yes |
| G04 | Open extirpation of lesion of oesophagus    | Other inpatient oesophagogastric surgery | Oesophagogastric surgery | General Surgery | No  |
| G05 | Bypass of oesophagus                        | Other inpatient oesophagogastric surgery | Oesophagogastric surgery | General Surgery | No  |
| G06 | Attention to connection of oesophagus       | Other inpatient oesophagogastric surgery | Oesophagogastric surgery | General Surgery | No  |
| G07 | Repair of oesophagus                        | Other inpatient oesophagogastric surgery | Oesophagogastric surgery | General Surgery | No  |
| G08 | Artificial opening into oesophagus          | Other inpatient oesophagogastric surgery | Oesophagogastric surgery | General Surgery | No  |
| G09 | Incision of oesophagus                      | Other inpatient oesophagogastric surgery | Oesophagogastric surgery | General Surgery | No  |
| G11 | Open placement of prosthesis in oesophagus  | Other inpatient oesophagogastric surgery | Oesophagogastric surgery | General Surgery | No  |
| G13 | Other open operations on oesophagus         | Other inpatient oesophagogastric surgery | Oesophagogastric surgery | General Surgery | No  |
| G24 | Antireflux operations                       | Other inpatient oesophagogastric surgery | Oesophagogastric surgery | General Surgery | No  |
| G25 | Revision of antireflux operations           | Other inpatient oesophagogastric surgery | Oesophagogastric surgery | General Surgery | No  |
| G29 | Open extirpation of lesion of stomach       | Other inpatient oesophagogastric surgery | Oesophagogastric surgery | General Surgery | No  |
| G31 | Connection of stomach to duodenum           | Other inpatient oesophagogastric surgery | Oesophagogastric surgery | General Surgery | No  |
| G32 | Connection of stomach to transposed jejunum | Other inpatient oesophagogastric surgery | Oesophagogastric surgery | General Surgery | No  |
| G33 | Other connection of stomach to jejunum      | Other inpatient oesophagogastric surgery | Oesophagogastric surgery | General Surgery | No  |
| G35 | Operations on ulcer of stomach              | Other inpatient oesophagogastric surgery | Oesophagogastric surgery | General Surgery | No  |
| G36 | Other repair of stomach                     | Other inpatient oesophagogastric surgery | Oesophagogastric surgery | General Surgery | No  |
| G38 | Other open operations on stomach            | Other inpatient oesophagogastric surgery | Oesophagogastric surgery | General Surgery | No  |
| G40 | Incision of pylorus                         | Other inpatient oesophagogastric surgery | Oesophagogastric surgery | General Surgery | No  |
| G41 | Other operations on pylorus                 | Other inpatient oesophagogastric surgery | Oesophagogastric surgery | General Surgery | No  |
| G50 | Open extirpation of lesion of duodenum      | Other inpatient oesophagogastric surgery | Oesophagogastric surgery | General Surgery | No  |
| G51 | Bypass of duodenum                          | Other inpatient oesophagogastric surgery | Oesophagogastric surgery | General Surgery | No  |
| G52 | Operations on ulcer of duodenum             | Other inpatient oesophagogastric surgery | Oesophagogastric surgery | General Surgery | No  |
| G53 | Other open operations on duodenum           | Other inpatient oesophagogastric surgery | Oesophagogastric surgery | General Surgery | No  |
| G57 | Other operations on duodenum                | Other inpatient oesophagogastric surgery | Oesophagogastric surgery | General Surgery | No  |
| G59 | Extirpation of lesion of jejunum            | Other inpatient oesophagogastric surgery | Oesophagogastric surgery | General Surgery | No  |
| G61 | Bypass of jejunum                           | Other inpatient oesophagogastric surgery | Oesophagogastric surgery | General Surgery | No  |
| G63 | Other open operations on jejunum            | Other inpatient oesophagogastric surgery | Oesophagogastric surgery | General Surgery | No  |
| G70 | Open extirpation of lesion of ileum         | Other inpatient oesophagogastric surgery | Oesophagogastric surgery | General Surgery | No  |
| G72 | Other connection of ileum                   | Other inpatient oesophagogastric surgery | Oesophagogastric surgery | General Surgery | No  |
| G73 | Attention to connection of ileum            | Other inpatient oesophagogastric surgery | Oesophagogastric surgery | General Surgery | No  |
| G76 | Intra-abdominal manipulation of ileum       | Other inpatient oesophagogastric surgery | Oesophagogastric surgery | General Surgery | No  |
| G78 | Other open operations on ileum              | Other inpatient oesophagogastric surgery | Oesophagogastric surgery | General Surgery | No  |
| G82 | Other operations on ileum                   | Other inpatient oesophagogastric surgery | Oesophagogastric surgery | General Surgery | No  |
| G26 | Transplantation of stomach                  | Transplant surgery                       | Oesophagogastric surgery | General Surgery | No  |

|     |                                                                   |                                  |                          |                 |     |
|-----|-------------------------------------------------------------------|----------------------------------|--------------------------|-----------------|-----|
| G68 | Transplantation of ileum                                          | Transplant surgery               | Oesophagogastric surgery | General Surgery | No  |
| X09 | Amputation of leg                                                 | Amputation of lower limb         | Vascular surgery         | General Surgery | No  |
| X10 | Amputation of foot                                                | Amputation of lower limb         | Vascular surgery         | General Surgery | No  |
| X11 | Amputation of toe                                                 | Amputation of lower limb         | Vascular surgery         | General Surgery | No  |
| X07 | Amputation of arm                                                 | Amputation of upper limb         | Vascular surgery         | General Surgery | No  |
| X08 | Amputation of hand                                                | Amputation of upper limb         | Vascular surgery         | General Surgery | Yes |
| L16 | Extra-anatomic bypass of aorta                                    | Aortic surgery                   | Vascular surgery         | General Surgery | No  |
| L18 | Emergency replacement of aneurysmal segment of aorta              | Aortic surgery                   | Vascular surgery         | General Surgery | No  |
| L19 | Other replacement of aneurysmal segment of aorta                  | Aortic surgery                   | Vascular surgery         | General Surgery | No  |
| L20 | Other emergency bypass of segment of aorta                        | Aortic surgery                   | Vascular surgery         | General Surgery | No  |
| L21 | Other bypass of segment of aorta                                  | Aortic surgery                   | Vascular surgery         | General Surgery | No  |
| L22 | Attention to prosthesis of aorta                                  | Aortic surgery                   | Vascular surgery         | General Surgery | No  |
| L23 | Plastic repair of aorta                                           | Aortic surgery                   | Vascular surgery         | General Surgery | No  |
| L25 | Other open operations on aorta                                    | Aortic surgery                   | Vascular surgery         | General Surgery | No  |
| L74 | Arteriovenous shunt                                               | Arteriovenous shunt              | Vascular surgery         | General Surgery | Yes |
| L75 | Other arteriovenous operations                                    | Arteriovenous shunt              | Vascular surgery         | General Surgery | Yes |
| L83 | Other operations for venous insufficiency                         | Other day-case vascular surgery  | Vascular surgery         | General Surgery | Yes |
| L93 | Other open operations on vein                                     | Other day-case vascular surgery  | Vascular surgery         | General Surgery | Yes |
| L98 | Operations on microvascular vessel                                | Other day-case vascular surgery  | Vascular surgery         | General Surgery | Yes |
| L81 | Other bypass operations on vein                                   | Other inpatient vascular surgery | Vascular surgery         | General Surgery | No  |
| L82 | Repair of valve of vein                                           | Other inpatient vascular surgery | Vascular surgery         | General Surgery | No  |
| L90 | Open removal of thrombus from vein                                | Other inpatient vascular surgery | Vascular surgery         | General Surgery | No  |
| L97 | Other operations on blood vessel                                  | Other inpatient vascular surgery | Vascular surgery         | General Surgery | No  |
| O15 | Operations on blood vessel                                        | Other inpatient vascular surgery | Vascular surgery         | General Surgery | No  |
| X12 | Operations on amputation stump                                    | Other inpatient vascular surgery | Vascular surgery         | General Surgery | No  |
| L29 | Reconstruction of carotid artery                                  | Surgery on arteries              | Vascular surgery         | General Surgery | No  |
| L30 | Other open operations on carotid artery                           | Surgery on arteries              | Vascular surgery         | General Surgery | No  |
| L37 | Reconstruction of subclavian artery                               | Surgery on arteries              | Vascular surgery         | General Surgery | No  |
| L38 | Other open operations on subclavian artery                        | Surgery on arteries              | Vascular surgery         | General Surgery | No  |
| L41 | Reconstruction of renal artery                                    | Surgery on arteries              | Vascular surgery         | General Surgery | No  |
| L42 | Other open operations on renal artery                             | Surgery on arteries              | Vascular surgery         | General Surgery | No  |
| L45 | Reconstruction of other visceral branch of abdominal aorta        | Surgery on arteries              | Vascular surgery         | General Surgery | No  |
| L46 | Other open operations on other visceral branch of abdominal aorta | Surgery on arteries              | Vascular surgery         | General Surgery | No  |
| L48 | Emergency replacement of aneurysmal iliac artery                  | Surgery on arteries              | Vascular surgery         | General Surgery | No  |
| L49 | Other replacement of aneurysmal iliac artery                      | Surgery on arteries              | Vascular surgery         | General Surgery | No  |
| L50 | Other emergency bypass of iliac artery                            | Surgery on arteries              | Vascular surgery         | General Surgery | No  |

|     |                                                                       |                                   |                  |                 |     |
|-----|-----------------------------------------------------------------------|-----------------------------------|------------------|-----------------|-----|
| L51 | Other bypass of iliac artery                                          | Surgery on arteries               | Vascular surgery | General Surgery | No  |
| L52 | Reconstruction of iliac artery                                        | Surgery on arteries               | Vascular surgery | General Surgery | No  |
| L53 | Other open operations on iliac artery                                 | Surgery on arteries               | Vascular surgery | General Surgery | No  |
| L56 | Emergency replacement of aneurysmal femoral artery                    | Surgery on arteries               | Vascular surgery | General Surgery | No  |
| L57 | Other replacement of aneurysmal femoral artery                        | Surgery on arteries               | Vascular surgery | General Surgery | No  |
| L58 | Other emergency bypass of femoral artery                              | Surgery on arteries               | Vascular surgery | General Surgery | No  |
| L59 | Other bypass of femoral artery                                        | Surgery on arteries               | Vascular surgery | General Surgery | No  |
| L60 | Reconstruction of femoral artery                                      | Surgery on arteries               | Vascular surgery | General Surgery | No  |
| L62 | Other open operations on femoral artery                               | Surgery on arteries               | Vascular surgery | General Surgery | No  |
| L65 | Revision of reconstruction of artery                                  | Surgery on arteries               | Vascular surgery | General Surgery | No  |
| L67 | Excision of other artery                                              | Surgery on arteries               | Vascular surgery | General Surgery | Yes |
| L68 | Repair of other artery                                                | Surgery on arteries               | Vascular surgery | General Surgery | Yes |
| L69 | Operations on major systemic to pulmonary collateral arteries         | Surgery on arteries               | Vascular surgery | General Surgery | No  |
| L70 | Other open operations on other artery                                 | Surgery on arteries               | Vascular surgery | General Surgery | Yes |
| L84 | Combined operations on varicose vein of leg                           | Varicose vein surgery             | Vascular surgery | General Surgery | Yes |
| L85 | Ligation of varicose vein of leg                                      | Varicose vein surgery             | Vascular surgery | General Surgery | Yes |
| L86 | Injection into varicose vein of leg                                   | Varicose vein surgery             | Vascular surgery | General Surgery | Yes |
| L87 | Other operations on varicose vein of leg                              | Varicose vein surgery             | Vascular surgery | General Surgery | Yes |
| K78 | Transluminal operations on internal mammary artery side branch        | Vascular interventional radiology | Vascular surgery | General Surgery | No  |
| L26 | Transluminal operations on aorta                                      | Vascular interventional radiology | Vascular surgery | General Surgery | No  |
| L27 | Transluminal insertion of stent graft for aneurysmal segment of aorta | Vascular interventional radiology | Vascular surgery | General Surgery | No  |
| L28 | Transluminal operations on aneurysmal segment of aorta                | Vascular interventional radiology | Vascular surgery | General Surgery | No  |
| L31 | Transluminal operations on carotid artery                             | Vascular interventional radiology | Vascular surgery | General Surgery | No  |
| L39 | Transluminal operations on subclavian artery                          | Vascular interventional radiology | Vascular surgery | General Surgery | No  |
| L43 | Transluminal operations on renal artery                               | Vascular interventional radiology | Vascular surgery | General Surgery | No  |
| L47 | Transluminal operations on other visceral branch of abdominal aorta   | Vascular interventional radiology | Vascular surgery | General Surgery | No  |
| L54 | Transluminal operations on iliac artery                               | Vascular interventional radiology | Vascular surgery | General Surgery | Yes |
| L63 | Transluminal operations on femoral artery                             | Vascular interventional radiology | Vascular surgery | General Surgery | Yes |
| L66 | Other therapeutic transluminal operations on artery                   | Vascular interventional radiology | Vascular surgery | General Surgery | No  |
| L71 | Therapeutic transluminal operations on other artery                   | Vascular interventional radiology | Vascular surgery | General Surgery | No  |
| L72 | Diagnostic transluminal operations on other artery                    | Vascular interventional radiology | Vascular surgery | General Surgery | No  |
| L73 | Mechanical embolic protection of blood vessel                         | Vascular interventional radiology | Vascular surgery | General Surgery | No  |
| L76 | Endovascular placement of stent                                       | Vascular interventional radiology | Vascular surgery | General Surgery | No  |
| L88 | Transluminal operations on varicose vein of leg                       | Vascular interventional radiology | Vascular surgery | General Surgery | Yes |
| L94 | Therapeutic transluminal operations on vein                           | Vascular interventional radiology | Vascular surgery | General Surgery | Yes |
| L95 | Diagnostic transluminal operations on vein                            | Vascular interventional radiology | Vascular surgery | General Surgery | Yes |



|     |                                                                       |                                   |                  |                 |     |
|-----|-----------------------------------------------------------------------|-----------------------------------|------------------|-----------------|-----|
| L96 | Percutaneous removal of thrombus from vein                            | Vascular interventional radiology | Vascular surgery | General Surgery | No  |
| L99 | Other therapeutic transluminal operations on vein                     | Vascular interventional radiology | Vascular surgery | General Surgery | Yes |
| O01 | Transluminal coil embolisation of aneurysm of artery                  | Vascular interventional radiology | Vascular surgery | General Surgery | No  |
| O02 | Transluminal balloon assisted coil embolisation of aneurysm of artery | Vascular interventional radiology | Vascular surgery | General Surgery | No  |
| O03 | Transluminal stent assisted coil embolisation of aneurysm of artery   | Vascular interventional radiology | Vascular surgery | General Surgery | No  |
| O04 | Other transluminal embolisation of aneurysm of artery                 | Vascular interventional radiology | Vascular surgery | General Surgery | No  |
| O20 | Endovascular placement of stent graft                                 | Vascular interventional radiology | Vascular surgery | General Surgery | Yes |
| P05 | Excision of vulva                                                     | Excision of vulva, vagina, cervix | Gynaecology      | Gynaecology     | Yes |
| Q01 | Excision of cervix uteri                                              | Excision of vulva, vagina, cervix | Gynaecology      | Gynaecology     | Yes |
| Q27 | Open bilateral occlusion of fallopian tubes                           | Female sterilisation              | Gynaecology      | Gynaecology     | Yes |
| Q28 | Other open occlusion of fallopian tube                                | Female sterilisation              | Gynaecology      | Gynaecology     | Yes |
| Q35 | Endoscopic bilateral occlusion of fallopian tubes                     | Female sterilisation              | Gynaecology      | Gynaecology     | Yes |
| Q37 | Endoscopic reversal of female sterilisation                           | Female sterilisation              | Gynaecology      | Gynaecology     | Yes |
| Q07 | Abdominal excision of uterus                                          | Hysterectomy, salpingoophrectomy  | Gynaecology      | Gynaecology     | No  |
| Q08 | Vaginal excision of uterus                                            | Hysterectomy, salpingoophrectomy  | Gynaecology      | Gynaecology     | No  |
| Q22 | Bilateral excision of adnexa of uterus                                | Hysterectomy, salpingoophrectomy  | Gynaecology      | Gynaecology     | No  |
| Q23 | Unilateral excision of adnexa of uterus                               | Hysterectomy, salpingoophrectomy  | Gynaecology      | Gynaecology     | No  |
| Q24 | Other excision of adnexa of uterus                                    | Hysterectomy, salpingoophrectomy  | Gynaecology      | Gynaecology     | Yes |
| Q25 | Partial excision of fallopian tube                                    | Hysterectomy, salpingoophrectomy  | Gynaecology      | Gynaecology     | Yes |
| Q43 | Partial excision of ovary                                             | Hysterectomy, salpingoophrectomy  | Gynaecology      | Gynaecology     | No  |
| Q17 | Therapeutic endoscopic operations on uterus                           | Hysteroscopy & related procedures | Gynaecology      | Gynaecology     | Yes |
| Q18 | Diagnostic endoscopic examination of uterus                           | Hysteroscopy & related procedures | Gynaecology      | Gynaecology     | Yes |
| M53 | Vaginal operations to support outlet of female bladder                | Other day-case gynaecology        | Gynaecology      | Gynaecology     | Yes |
| M57 | Other vaginal operations to support outlet of female bladder          | Other day-case gynaecology        | Gynaecology      | Gynaecology     | Yes |
| M58 | Other operations on outlet of female bladder                          | Other day-case gynaecology        | Gynaecology      | Gynaecology     | Yes |
| P01 | Operations on clitoris                                                | Other day-case gynaecology        | Gynaecology      | Gynaecology     | Yes |
| P03 | Operations on Bartholin gland                                         | Other day-case gynaecology        | Gynaecology      | Gynaecology     | Yes |
| P06 | Extirpation of lesion of vulva                                        | Other day-case gynaecology        | Gynaecology      | Gynaecology     | Yes |
| P07 | Repair of vulva                                                       | Other day-case gynaecology        | Gynaecology      | Gynaecology     | Yes |
| P09 | Other operations on vulva                                             | Other day-case gynaecology        | Gynaecology      | Gynaecology     | Yes |
| P11 | Extirpation of lesion of female perineum                              | Other day-case gynaecology        | Gynaecology      | Gynaecology     | Yes |
| P13 | Other operations on female perineum                                   | Other day-case gynaecology        | Gynaecology      | Gynaecology     | Yes |
| P14 | Incision of introitus of vagina                                       | Other day-case gynaecology        | Gynaecology      | Gynaecology     | Yes |
| P15 | Other operations on introitus of vagina                               | Other day-case gynaecology        | Gynaecology      | Gynaecology     | Yes |
| P17 | Excision of vagina                                                    | Other day-case gynaecology        | Gynaecology      | Gynaecology     | Yes |
| P19 | Excision of band of vagina                                            | Other day-case gynaecology        | Gynaecology      | Gynaecology     | Yes |
| P20 | Extirpation of lesion of vagina                                       | Other day-case gynaecology        | Gynaecology      | Gynaecology     | Yes |
| P26 | Introduction of supporting pessary into vagina                        | Other day-case gynaecology        | Gynaecology      | Gynaecology     | Yes |
| P27 | Exploration of vagina                                                 | Other day-case gynaecology        | Gynaecology      | Gynaecology     | Yes |
| P29 | Other operations on vagina                                            | Other day-case gynaecology        | Gynaecology      | Gynaecology     | Yes |
| P31 | Operations on pouch of Douglas                                        | Other day-case gynaecology        | Gynaecology      | Gynaecology     | Yes |
| P32 | Other plastic operations on vagina                                    | Other day-case gynaecology        | Gynaecology      | Gynaecology     | Yes |
| Q02 | Destruction of lesion of cervix uteri                                 | Other day-case gynaecology        | Gynaecology      | Gynaecology     | Yes |
| Q03 | Biopsy of cervix uteri                                                | Other day-case gynaecology        | Gynaecology      | Gynaecology     | Yes |
| Q05 | Other operations on cervix uteri                                      | Other day-case gynaecology        | Gynaecology      | Gynaecology     | Yes |
| Q10 | Curettage of uterus                                                   | Other day-case gynaecology        | Gynaecology      | Gynaecology     | Yes |
| Q16 | Other vaginal operations on uterus                                    | Other day-case gynaecology        | Gynaecology      | Gynaecology     | Yes |
| Q19 | Plastic operations on uterus                                          | Other day-case gynaecology        | Gynaecology      | Gynaecology     | Yes |
| Q20 | Other operations on uterus                                            | Other day-case gynaecology        | Gynaecology      | Gynaecology     | Yes |
| Q26 | Placement of prosthesis in fallopian tube                             | Other day-case gynaecology        | Gynaecology      | Gynaecology     | Yes |
| Q29 | Open reversal of female sterilisation                                 | Other day-case gynaecology        | Gynaecology      | Gynaecology     | Yes |
| Q30 | Other repair of fallopian tube                                        | Other day-case gynaecology        | Gynaecology      | Gynaecology     | Yes |
| Q31 | Incision of fallopian tube                                            | Other day-case gynaecology        | Gynaecology      | Gynaecology     | Yes |
| Q32 | Operations on fimbria                                                 | Other day-case gynaecology        | Gynaecology      | Gynaecology     | Yes |

|     |                                                                               |                              |                     |                     |     |
|-----|-------------------------------------------------------------------------------|------------------------------|---------------------|---------------------|-----|
| Q34 | Other open operations on fallopian tube                                       | Other day-case gynaecology   | Gynaecology         | Gynaecology         | Yes |
| Q36 | Other endoscopic occlusion of fallopian tube                                  | Other day-case gynaecology   | Gynaecology         | Gynaecology         | Yes |
| Q38 | Other therapeutic endoscopic operations on fallopian tube                     | Other day-case gynaecology   | Gynaecology         | Gynaecology         | Yes |
| Q41 | Other operations on fallopian tube                                            | Other day-case gynaecology   | Gynaecology         | Gynaecology         | Yes |
| Q52 | Operations on broad ligament of uterus                                        | Other day-case gynaecology   | Gynaecology         | Gynaecology         | Yes |
| Q54 | Operations on other ligament of uterus                                        | Other day-case gynaecology   | Gynaecology         | Gynaecology         | Yes |
| Q55 | Other examination of female genital tract                                     | Other day-case gynaecology   | Gynaecology         | Gynaecology         | Yes |
| Q56 | Other operations on female genital tract                                      | Other day-case gynaecology   | Gynaecology         | Gynaecology         | Yes |
| Q57 | Other operations on other ligament of uterus                                  | Other day-case gynaecology   | Gynaecology         | Gynaecology         | Yes |
| M51 | Combined abdominal and vaginal operations to support outlet of female bladder | Other inpatient gynaecology  | Gynaecology         | Gynaecology         | No  |
| M52 | Abdominal operations to support outlet of female bladder                      | Other inpatient gynaecology  | Gynaecology         | Gynaecology         | No  |
| M55 | Other open operations on outlet of female bladder                             | Other inpatient gynaecology  | Gynaecology         | Gynaecology         | No  |
| P18 | Other obliteration of vagina                                                  | Other inpatient gynaecology  | Gynaecology         | Gynaecology         | No  |
| P21 | Plastic operations on vagina                                                  | Other inpatient gynaecology  | Gynaecology         | Gynaecology         | No  |
| P24 | Repair of vault of vagina                                                     | Other inpatient gynaecology  | Gynaecology         | Gynaecology         | No  |
| P25 | Other repair of vagina                                                        | Other inpatient gynaecology  | Gynaecology         | Gynaecology         | No  |
| P30 | Other repair of vault of vagina                                               | Other inpatient gynaecology  | Gynaecology         | Gynaecology         | No  |
| Q09 | Other open operations on uterus                                               | Other inpatient gynaecology  | Gynaecology         | Gynaecology         | No  |
| Q44 | Open destruction of lesion of ovary                                           | Ovarian surgery              | Gynaecology         | Gynaecology         | Yes |
| Q45 | Repair of ovary                                                               | Ovarian surgery              | Gynaecology         | Gynaecology         | Yes |
| Q47 | Other open operations on ovary                                                | Ovarian surgery              | Gynaecology         | Gynaecology         | No  |
| Q49 | Therapeutic endoscopic operations on ovary                                    | Ovarian surgery              | Gynaecology         | Gynaecology         | Yes |
| Q51 | Other operations on ovary                                                     | Ovarian surgery              | Gynaecology         | Gynaecology         | Yes |
| P22 | Repair of prolapse of vagina and amputation of cervix uteri                   | Repair of prolapse of vagina | Gynaecology         | Gynaecology         | No  |
| P23 | Other repair of prolapse of vagina                                            | Repair of prolapse of vagina | Gynaecology         | Gynaecology         | No  |
| P28 | Repair of prolapse of vagina                                                  | Repair of prolapse of vagina | Gynaecology         | Gynaecology         | Yes |
| E20 | Operations on adenoid                                                         | Adenoidectomy                | Head & Neck surgery | Head & Neck surgery | Yes |
| E24 | Therapeutic endoscopic operations on pharynx                                  | Laryngoscopy                 | Head & Neck surgery | Head & Neck surgery | No  |
| E25 | Diagnostic endoscopic examination of pharynx                                  | Laryngoscopy                 | Head & Neck surgery | Head & Neck surgery | Yes |
| E35 | Other therapeutic endoscopic operations on larynx                             | Laryngoscopy                 | Head & Neck surgery | Head & Neck surgery | Yes |
| D10 | Exenteration of mastoid air cells                                             | Maxillofacial surgery        | Head & Neck surgery | Head & Neck surgery | Yes |
| D12 | Other operations on mastoid                                                   | Maxillofacial surgery        | Head & Neck surgery | Head & Neck surgery | Yes |
| E12 | Operations on maxillary antrum using sublabial approach                       | Maxillofacial surgery        | Head & Neck surgery | Head & Neck surgery | Yes |
| E13 | Other operations on maxillary antrum                                          | Maxillofacial surgery        | Head & Neck surgery | Head & Neck surgery | Yes |
| E16 | Other operations on frontal sinus                                             | Maxillofacial surgery        | Head & Neck surgery | Head & Neck surgery | Yes |
| F18 | Excision of dental lesion of jaw                                              | Maxillofacial surgery        | Head & Neck surgery | Head & Neck surgery | Yes |
| F29 | Correction of deformity of palate                                             | Maxillofacial surgery        | Head & Neck surgery | Head & Neck surgery | No  |
| V06 | Excision of maxilla                                                           | Maxillofacial surgery        | Head & Neck surgery | Head & Neck surgery | No  |
| V07 | Excision of bone of face                                                      | Maxillofacial surgery        | Head & Neck surgery | Head & Neck surgery | Yes |
| V08 | Reduction of fracture of maxilla                                              | Maxillofacial surgery        | Head & Neck surgery | Head & Neck surgery | No  |
| V09 | Reduction of fracture of other bone of face                                   | Maxillofacial surgery        | Head & Neck surgery | Head & Neck surgery | Yes |
| V10 | Division of bone of face                                                      | Maxillofacial surgery        | Head & Neck surgery | Head & Neck surgery | No  |
| V11 | Fixation of bone of face                                                      | Maxillofacial surgery        | Head & Neck surgery | Head & Neck surgery | Yes |
| V13 | Other operations on bone of face                                              | Maxillofacial surgery        | Head & Neck surgery | Head & Neck surgery | No  |
| V14 | Excision of mandible                                                          | Maxillofacial surgery        | Head & Neck surgery | Head & Neck surgery | No  |
| V15 | Reduction of fracture of mandible                                             | Maxillofacial surgery        | Head & Neck surgery | Head & Neck surgery | No  |
| V16 | Division of mandible                                                          | Maxillofacial surgery        | Head & Neck surgery | Head & Neck surgery | No  |
| V17 | Fixation of mandible                                                          | Maxillofacial surgery        | Head & Neck surgery | Head & Neck surgery | Yes |
| V18 | Distraction osteogenesis of bones of skull                                    | Maxillofacial surgery        | Head & Neck surgery | Head & Neck surgery | No  |

|     |                                                  |                       |                     |                     |     |
|-----|--------------------------------------------------|-----------------------|---------------------|---------------------|-----|
| V19 | Other operations on mandible                     | Maxillofacial surgery | Head & Neck surgery | Head & Neck surgery | Yes |
| V20 | Reconstruction of temporomandibular joint        | Maxillofacial surgery | Head & Neck surgery | Head & Neck surgery | No  |
| V21 | Other operations on temporomandibular joint      | Maxillofacial surgery | Head & Neck surgery | Head & Neck surgery | Yes |
| D01 | Excision of external ear                         | Operations on ear     | Head & Neck surgery | Head & Neck surgery | Yes |
| D02 | Extirpation of lesion of external ear            | Operations on ear     | Head & Neck surgery | Head & Neck surgery | Yes |
| D03 | Plastic operations on external ear               | Operations on ear     | Head & Neck surgery | Head & Neck surgery | Yes |
| D04 | Drainage of external ear                         | Operations on ear     | Head & Neck surgery | Head & Neck surgery | Yes |
| D05 | Attachment of auricular prosthesis               | Operations on ear     | Head & Neck surgery | Head & Neck surgery | Yes |
| D06 | Other operations on external ear                 | Operations on ear     | Head & Neck surgery | Head & Neck surgery | Yes |
| D07 | Clearance of external auditory canal             | Operations on ear     | Head & Neck surgery | Head & Neck surgery | Yes |
| D08 | Other operations on external auditory canal      | Operations on ear     | Head & Neck surgery | Head & Neck surgery | Yes |
| D13 | Attachment of bone anchored hearing prosthesis   | Operations on ear     | Head & Neck surgery | Head & Neck surgery | Yes |
| D14 | Repair of eardrum                                | Operations on ear     | Head & Neck surgery | Head & Neck surgery | Yes |
| D15 | Drainage of middle ear                           | Operations on ear     | Head & Neck surgery | Head & Neck surgery | Yes |
| D16 | Reconstruction of ossicular chain                | Operations on ear     | Head & Neck surgery | Head & Neck surgery | Yes |
| D17 | Other operations on ossicle of ear               | Operations on ear     | Head & Neck surgery | Head & Neck surgery | Yes |
| D19 | Extirpation of lesion of middle ear              | Operations on ear     | Head & Neck surgery | Head & Neck surgery | Yes |
| D20 | Other operations on middle ear                   | Operations on ear     | Head & Neck surgery | Head & Neck surgery | Yes |
| D22 | Operations on eustachian canal                   | Operations on ear     | Head & Neck surgery | Head & Neck surgery | Yes |
| D23 | Operations on inner ear                          | Operations on ear     | Head & Neck surgery | Head & Neck surgery | Yes |
| D24 | Operations on cochlea                            | Operations on ear     | Head & Neck surgery | Head & Neck surgery | No  |
| D26 | Operations on vestibular apparatus               | Operations on ear     | Head & Neck surgery | Head & Neck surgery | No  |
| D28 | Other operations on ear                          | Operations on ear     | Head & Neck surgery | Head & Neck surgery | Yes |
| E19 | Excision of pharynx                              | Operations on neck    | Head & Neck surgery | Head & Neck surgery | No  |
| E21 | Repair of pharynx                                | Operations on neck    | Head & Neck surgery | Head & Neck surgery | No  |
| E23 | Other open operations on pharynx                 | Operations on neck    | Head & Neck surgery | Head & Neck surgery | No  |
| E27 | Other operations on pharynx                      | Operations on neck    | Head & Neck surgery | Head & Neck surgery | Yes |
| E28 | Operations on cricopharyngeus muscle             | Operations on neck    | Head & Neck surgery | Head & Neck surgery | No  |
| E29 | Excision of larynx                               | Operations on neck    | Head & Neck surgery | Head & Neck surgery | No  |
| E30 | Open extirpation of lesion of larynx             | Operations on neck    | Head & Neck surgery | Head & Neck surgery | No  |
| E31 | Reconstruction of larynx                         | Operations on neck    | Head & Neck surgery | Head & Neck surgery | No  |
| E33 | Other open operations on larynx                  | Operations on neck    | Head & Neck surgery | Head & Neck surgery | Yes |
| E34 | Microtherapeutic endoscopic operations on larynx | Operations on neck    | Head & Neck surgery | Head & Neck surgery | Yes |
| E38 | Other operations on larynx                       | Operations on neck    | Head & Neck surgery | Head & Neck surgery | Yes |
| E42 | Exteriorisation of trachea                       | Operations on neck    | Head & Neck surgery | Head & Neck surgery | No  |
| E01 | Excision of nose                                 | Operations on nose    | Head & Neck surgery | Head & Neck surgery | No  |

|     |                                                     |                    |                     |                     |     |
|-----|-----------------------------------------------------|--------------------|---------------------|---------------------|-----|
| E02 | Plastic operations on nose                          | Operations on nose | Head & Neck surgery | Head & Neck surgery | Yes |
| E03 | Operations on septum of nose                        | Operations on nose | Head & Neck surgery | Head & Neck surgery | Yes |
| E04 | Operations on turbinate of nose                     | Operations on nose | Head & Neck surgery | Head & Neck surgery | Yes |
| E05 | Surgical arrest of bleeding from internal nose      | Operations on nose | Head & Neck surgery | Head & Neck surgery | Yes |
| E08 | Other operations on internal nose                   | Operations on nose | Head & Neck surgery | Head & Neck surgery | Yes |
| E09 | Operations on external nose                         | Operations on nose | Head & Neck surgery | Head & Neck surgery | Yes |
| E10 | Other operations on nose                            | Operations on nose | Head & Neck surgery | Head & Neck surgery | Yes |
| E11 | Operations on fixtures for nasal prosthesis         | Operations on nose | Head & Neck surgery | Head & Neck surgery | Yes |
| E14 | Operations on frontal sinus                         | Operations on nose | Head & Neck surgery | Head & Neck surgery | Yes |
| E15 | Operations on sphenoid sinus                        | Operations on nose | Head & Neck surgery | Head & Neck surgery | Yes |
| E17 | Operations on unspecified nasal sinus               | Operations on nose | Head & Neck surgery | Head & Neck surgery | Yes |
| E64 | Therapeutic endoscopic operations on nasal cavity   | Operations on nose | Head & Neck surgery | Head & Neck surgery | Yes |
| E66 | Other operations on external nose                   | Operations on nose | Head & Neck surgery | Head & Neck surgery | Yes |
| T94 | Operations on branchial cleft                       | Operations on nose | Head & Neck surgery | Head & Neck surgery | Yes |
| F20 | Operations on gingiva                               | Oral surgery       | Head & Neck surgery | Head & Neck surgery | Yes |
| F22 | Excision of tongue                                  | Oral surgery       | Head & Neck surgery | Head & Neck surgery | No  |
| F23 | Extirpation of lesion of tongue                     | Oral surgery       | Head & Neck surgery | Head & Neck surgery | Yes |
| F24 | Incision of tongue                                  | Oral surgery       | Head & Neck surgery | Head & Neck surgery | Yes |
| F26 | Other operations on tongue                          | Oral surgery       | Head & Neck surgery | Head & Neck surgery | Yes |
| F28 | Extirpation of lesion of palate                     | Oral surgery       | Head & Neck surgery | Head & Neck surgery | Yes |
| F30 | Other repair of palate                              | Oral surgery       | Head & Neck surgery | Head & Neck surgery | No  |
| F32 | Other operations on palate                          | Oral surgery       | Head & Neck surgery | Head & Neck surgery | Yes |
| F38 | Extirpation of lesion of other part of mouth        | Oral surgery       | Head & Neck surgery | Head & Neck surgery | Yes |
| F39 | Reconstruction of other part of mouth               | Oral surgery       | Head & Neck surgery | Head & Neck surgery | No  |
| F40 | Other repair of other part of mouth                 | Oral surgery       | Head & Neck surgery | Head & Neck surgery | Yes |
| F42 | Other operations on mouth                           | Oral surgery       | Head & Neck surgery | Head & Neck surgery | Yes |
| F44 | Excision of salivary gland                          | Oral surgery       | Head & Neck surgery | Head & Neck surgery | No  |
| F45 | Extirpation of lesion of salivary gland             | Oral surgery       | Head & Neck surgery | Head & Neck surgery | Yes |
| F46 | Incision of salivary gland                          | Oral surgery       | Head & Neck surgery | Head & Neck surgery | Yes |
| F48 | Other operations on salivary gland                  | Oral surgery       | Head & Neck surgery | Head & Neck surgery | Yes |
| F50 | Transposition of salivary duct                      | Oral surgery       | Head & Neck surgery | Head & Neck surgery | Yes |
| F51 | Open extraction of calculus from salivary duct      | Oral surgery       | Head & Neck surgery | Head & Neck surgery | Yes |
| F52 | Ligation of salivary duct                           | Oral surgery       | Head & Neck surgery | Head & Neck surgery | Yes |
| F53 | Other open operations on salivary duct              | Oral surgery       | Head & Neck surgery | Head & Neck surgery | Yes |
| F55 | Dilation of salivary duct                           | Oral surgery       | Head & Neck surgery | Head & Neck surgery | Yes |
| F56 | Manipulative removal of calculus from salivary duct | Oral surgery       | Head & Neck surgery | Head & Neck surgery | Yes |

|     |                                                              |                                        |                     |                     |     |
|-----|--------------------------------------------------------------|----------------------------------------|---------------------|---------------------|-----|
| F58 | Other operations on salivary duct                            | Oral surgery                           | Head & Neck surgery | Head & Neck surgery | Yes |
| F34 | Excision of tonsil                                           | Tonsillectomy                          | Head & Neck surgery | Head & Neck surgery | Yes |
| F36 | Other operations on tonsil                                   | Tonsillectomy                          | Head & Neck surgery | Head & Neck surgery | Yes |
| A01 | Major excision of tissue of brain                            | Brain tissue surgery                   | Neurosurgery        | Neurosurgery        | No  |
| A02 | Excision of lesion of tissue of brain                        | Brain tissue surgery                   | Neurosurgery        | Neurosurgery        | No  |
| A03 | Stereotactic ablation of tissue of brain                     | Brain tissue surgery                   | Neurosurgery        | Neurosurgery        | No  |
| A04 | Open biopsy of lesion of tissue of brain                     | Brain tissue surgery                   | Neurosurgery        | Neurosurgery        | No  |
| A05 | Drainage of lesion of tissue of brain                        | Brain tissue surgery                   | Neurosurgery        | Neurosurgery        | No  |
| A06 | Other excision of lesion of tissue of brain                  | Brain tissue surgery                   | Neurosurgery        | Neurosurgery        | No  |
| A08 | Other biopsy of lesion of tissue of brain                    | Brain tissue surgery                   | Neurosurgery        | Neurosurgery        | No  |
| A10 | Other operations on tissue of brain                          | Brain tissue surgery                   | Neurosurgery        | Neurosurgery        | Yes |
| A11 | Operations on tissue of brain                                | Brain tissue surgery                   | Neurosurgery        | Neurosurgery        | No  |
| A12 | Creation of connection from ventricle of brain               | Brain ventricular surgery              | Neurosurgery        | Neurosurgery        | No  |
| A13 | Attention to component of connection from ventricle of brain | Brain ventricular surgery              | Neurosurgery        | Neurosurgery        | No  |
| A14 | Other operations on connection from ventricle of brain       | Brain ventricular surgery              | Neurosurgery        | Neurosurgery        | No  |
| A16 | Other open operations on ventricle of brain                  | Brain ventricular surgery              | Neurosurgery        | Neurosurgery        | No  |
| A17 | Therapeutic endoscopic operations on ventricle of brain      | Brain ventricular surgery              | Neurosurgery        | Neurosurgery        | No  |
| A18 | Diagnostic endoscopic examination of ventricle of brain      | Brain ventricular surgery              | Neurosurgery        | Neurosurgery        | No  |
| A20 | Other operations on ventricle of brain                       | Brain ventricular surgery              | Neurosurgery        | Neurosurgery        | No  |
| A24 | Graft to cranial nerve                                       | Cranial nerve surgery                  | Neurosurgery        | Neurosurgery        | No  |
| A25 | Intracranial transection of cranial nerve                    | Cranial nerve surgery                  | Neurosurgery        | Neurosurgery        | No  |
| A26 | Other intracranial destruction of cranial nerve              | Cranial nerve surgery                  | Neurosurgery        | Neurosurgery        | Yes |
| A27 | Extracranial extirpation of vagus nerve (x)                  | Cranial nerve surgery                  | Neurosurgery        | Neurosurgery        | No  |
| A28 | Extracranial extirpation of other cranial nerve              | Cranial nerve surgery                  | Neurosurgery        | Neurosurgery        | Yes |
| A29 | Excision of lesion of cranial nerve                          | Cranial nerve surgery                  | Neurosurgery        | Neurosurgery        | No  |
| A30 | Repair of cranial nerve                                      | Cranial nerve surgery                  | Neurosurgery        | Neurosurgery        | No  |
| A31 | Intracranial stereotactic release of cranial nerve           | Cranial nerve surgery                  | Neurosurgery        | Neurosurgery        | Yes |
| A32 | Other decompression of cranial nerve                         | Cranial nerve surgery                  | Neurosurgery        | Neurosurgery        | No  |
| A34 | Exploration of cranial nerve                                 | Cranial nerve surgery                  | Neurosurgery        | Neurosurgery        | No  |
| A36 | Other operations on cranial nerve                            | Cranial nerve surgery                  | Neurosurgery        | Neurosurgery        | Yes |
| A07 | Other open operations on tissue of brain                     | Cranium and dural surgery              | Neurosurgery        | Neurosurgery        | No  |
| A22 | Operations on subarachnoid space of brain                    | Cranium and dural surgery              | Neurosurgery        | Neurosurgery        | No  |
| A38 | Extirpation of lesion of meninges of brain                   | Cranium and dural surgery              | Neurosurgery        | Neurosurgery        | No  |
| A39 | Repair of dura                                               | Cranium and dural surgery              | Neurosurgery        | Neurosurgery        | No  |
| A40 | Drainage of extradural space                                 | Cranium and dural surgery              | Neurosurgery        | Neurosurgery        | No  |
| A41 | Drainage of subdural space                                   | Cranium and dural surgery              | Neurosurgery        | Neurosurgery        | No  |
| A42 | Other operations on meninges of brain                        | Cranium and dural surgery              | Neurosurgery        | Neurosurgery        | No  |
| A43 | Other extirpation of lesion of meninges of brain             | Cranium and dural surgery              | Neurosurgery        | Neurosurgery        | No  |
| O05 | Operations on dural arteriovenous fistula                    | Cranium and dural surgery              | Neurosurgery        | Neurosurgery        | No  |
| V03 | Opening of cranium                                           | Cranium and dural surgery              | Neurosurgery        | Neurosurgery        | No  |
| V04 | Reshaping of cranium                                         | Cranium and dural surgery              | Neurosurgery        | Neurosurgery        | Yes |
| V05 | Other operations on cranium                                  | Cranium and dural surgery              | Neurosurgery        | Neurosurgery        | No  |
| V12 | Operations on bones of skull                                 | Cranium and dural surgery              | Neurosurgery        | Neurosurgery        | No  |
| L35 | Transluminal operations on cerebral artery                   | Neurovascular interventional radiology | Neurosurgery        | Neurosurgery        | Yes |
| L33 | Operations on aneurysm of cerebral artery                    | Other inpatient neurosurgery           | Neurosurgery        | Neurosurgery        | No  |
| L34 | Other open operations on cerebral artery                     | Other inpatient neurosurgery           | Neurosurgery        | Neurosurgery        | No  |
| C71 | Extracapsular extraction of lens                             | Cataract surgery                       | Ophthalmology       | Ophthalmology       | Yes |
| C72 | Intracapsular extraction of lens                             | Cataract surgery                       | Ophthalmology       | Ophthalmology       | Yes |
| C73 | Incision of capsule of lens                                  | Cataract surgery                       | Ophthalmology       | Ophthalmology       | Yes |
| C74 | Other extraction of lens                                     | Cataract surgery                       | Ophthalmology       | Ophthalmology       | Yes |
| C75 | Prosthesis of lens                                           | Cataract surgery                       | Ophthalmology       | Ophthalmology       | Yes |
| C77 | Other operations on lens                                     | Cataract surgery                       | Ophthalmology       | Ophthalmology       | Yes |
| C59 | Excision of iris                                             | Glaucoma surgery                       | Ophthalmology       | Ophthalmology       | Yes |
| C60 | Filtering operations on iris                                 | Glaucoma surgery                       | Ophthalmology       | Ophthalmology       | Yes |
| C62 | Incision of iris                                             | Glaucoma surgery                       | Ophthalmology       | Ophthalmology       | Yes |
| C64 | Other operations on iris                                     | Glaucoma surgery                       | Ophthalmology       | Ophthalmology       | Yes |
| C65 | Operations following glaucoma surgery                        | Glaucoma surgery                       | Ophthalmology       | Ophthalmology       | Yes |
| C79 | Operations on vitreous body                                  | Operations on vitreous body of eye     | Ophthalmology       | Ophthalmology       | Yes |
| C02 | Extirpation of lesion of orbit                               | Other day-case ophthalmology           | Ophthalmology       | Ophthalmology       | Yes |
| C03 | Insertion of prosthesis of eye                               | Other day-case ophthalmology           | Ophthalmology       | Ophthalmology       | Yes |
| C04 | Attention to prosthesis of eye                               | Other day-case ophthalmology           | Ophthalmology       | Ophthalmology       | Yes |
| C09 | Replacement of canthal tendon                                | Other day-case ophthalmology           | Ophthalmology       | Ophthalmology       | Yes |
| C11 | Operations on canthus                                        | Other day-case ophthalmology           | Ophthalmology       | Ophthalmology       | Yes |
| C24 | Operations on lacrimal gland                                 | Other day-case ophthalmology           | Ophthalmology       | Ophthalmology       | Yes |
| C25 | Connection between lacrimal apparatus and nose               | Other day-case ophthalmology           | Ophthalmology       | Ophthalmology       | Yes |
| C26 | Other operations on lacrimal sac                             | Other day-case ophthalmology           | Ophthalmology       | Ophthalmology       | Yes |
| C27 | Operations on nasolacrimal duct                              | Other day-case ophthalmology           | Ophthalmology       | Ophthalmology       | Yes |

|     |                                                       |                                |                 |                 |     |
|-----|-------------------------------------------------------|--------------------------------|-----------------|-----------------|-----|
| C29 | Other operations on lacrimal apparatus                | Other day-case ophthalmology   | Ophthalmology   | Ophthalmology   | Yes |
| C31 | Combined operations on muscles of eye                 | Other day-case ophthalmology   | Ophthalmology   | Ophthalmology   | Yes |
| C32 | Recession of muscle of eye                            | Other day-case ophthalmology   | Ophthalmology   | Ophthalmology   | Yes |
| C33 | Resection of muscle of eye                            | Other day-case ophthalmology   | Ophthalmology   | Ophthalmology   | Yes |
| C34 | Partial division of tendon of muscle of eye           | Other day-case ophthalmology   | Ophthalmology   | Ophthalmology   | Yes |
| C35 | Other adjustment to muscle of eye                     | Other day-case ophthalmology   | Ophthalmology   | Ophthalmology   | Yes |
| C37 | Other operations on muscle of eye                     | Other day-case ophthalmology   | Ophthalmology   | Ophthalmology   | Yes |
| C39 | Extirpation of lesion of conjunctiva                  | Other day-case ophthalmology   | Ophthalmology   | Ophthalmology   | Yes |
| C40 | Repair of conjunctiva                                 | Other day-case ophthalmology   | Ophthalmology   | Ophthalmology   | Yes |
| C41 | Incision of conjunctiva                               | Other day-case ophthalmology   | Ophthalmology   | Ophthalmology   | Yes |
| C43 | Other operations on conjunctiva                       | Other day-case ophthalmology   | Ophthalmology   | Ophthalmology   | Yes |
| C44 | Other plastic operations on cornea                    | Other day-case ophthalmology   | Ophthalmology   | Ophthalmology   | Yes |
| C45 | Extirpation of lesion of cornea                       | Other day-case ophthalmology   | Ophthalmology   | Ophthalmology   | Yes |
| C46 | Plastic operations on cornea                          | Other day-case ophthalmology   | Ophthalmology   | Ophthalmology   | Yes |
| C47 | Closure of cornea                                     | Other day-case ophthalmology   | Ophthalmology   | Ophthalmology   | Yes |
| C49 | Incision of cornea                                    | Other day-case ophthalmology   | Ophthalmology   | Ophthalmology   | Yes |
| C51 | Other operations on cornea                            | Other day-case ophthalmology   | Ophthalmology   | Ophthalmology   | Yes |
| C52 | Excision of sclera                                    | Other day-case ophthalmology   | Ophthalmology   | Ophthalmology   | Yes |
| C53 | Extirpation of lesion of sclera                       | Other day-case ophthalmology   | Ophthalmology   | Ophthalmology   | Yes |
| C54 | Buckling operations for attachment of retina          | Other day-case ophthalmology   | Ophthalmology   | Ophthalmology   | Yes |
| C55 | Incision of sclera                                    | Other day-case ophthalmology   | Ophthalmology   | Ophthalmology   | Yes |
| C57 | Other operations on sclera                            | Other day-case ophthalmology   | Ophthalmology   | Ophthalmology   | Yes |
| C61 | Other operations on trabecular meshwork of eye        | Other day-case ophthalmology   | Ophthalmology   | Ophthalmology   | Yes |
| C66 | Extirpation of ciliary body                           | Other day-case ophthalmology   | Ophthalmology   | Ophthalmology   | Yes |
| C67 | Other operations on ciliary body                      | Other day-case ophthalmology   | Ophthalmology   | Ophthalmology   | Yes |
| C69 | Other operations on anterior chamber of eye           | Other day-case ophthalmology   | Ophthalmology   | Ophthalmology   | Yes |
| C80 | Operations on retinal membrane                        | Other day-case ophthalmology   | Ophthalmology   | Ophthalmology   | Yes |
| C81 | Photocoagulation of retina for detachment             | Other day-case ophthalmology   | Ophthalmology   | Ophthalmology   | Yes |
| C82 | Destruction of lesion of retina                       | Other day-case ophthalmology   | Ophthalmology   | Ophthalmology   | Yes |
| C84 | Other operations on retina                            | Other day-case ophthalmology   | Ophthalmology   | Ophthalmology   | Yes |
| C85 | Fixation of retina                                    | Other day-case ophthalmology   | Ophthalmology   | Ophthalmology   | Yes |
| C86 | Other operations on eye                               | Other day-case ophthalmology   | Ophthalmology   | Ophthalmology   | Yes |
| C87 | Evaluation of retina                                  | Other day-case ophthalmology   | Ophthalmology   | Ophthalmology   | Yes |
| C88 | Destruction of subretinal lesion                      | Other day-case ophthalmology   | Ophthalmology   | Ophthalmology   | Yes |
| C89 | Operations on posterior segment of eye                | Other day-case ophthalmology   | Ophthalmology   | Ophthalmology   | Yes |
| C90 | Local anaesthetics for ophthalmology procedures       | Other day-case ophthalmology   | Ophthalmology   | Ophthalmology   | Yes |
| C01 | Excision of eye                                       | Other inpatient ophthalmology  | Ophthalmology   | Ophthalmology   | No  |
| C05 | Plastic repair of orbit                               | Other inpatient ophthalmology  | Ophthalmology   | Ophthalmology   | No  |
| C06 | Incision of orbit                                     | Other inpatient ophthalmology  | Ophthalmology   | Ophthalmology   | No  |
| C08 | Other operations on orbit                             | Other inpatient ophthalmology  | Ophthalmology   | Ophthalmology   | No  |
| C83 | Translocation of retina                               | Other inpatient ophthalmology  | Ophthalmology   | Ophthalmology   | No  |
| C91 | Operations on anterior segment of eye                 | Other inpatient ophthalmology  | Ophthalmology   | Ophthalmology   | No  |
| S04 | Other excision of skin                                | Excision of lesion of skin     | Plastic surgery | Plastic Surgery | Yes |
| S06 | Other excision of lesion of skin                      | Excision of lesion of skin     | Plastic surgery | Plastic Surgery | Yes |
| S08 | Curettage of lesion of skin                           | Excision of lesion of skin     | Plastic surgery | Plastic Surgery | Yes |
| S10 | Other destruction of lesion of skin of head or neck   | Excision of lesion of skin     | Plastic surgery | Plastic Surgery | Yes |
| S11 | Other destruction of lesion of skin of other site     | Excision of lesion of skin     | Plastic surgery | Plastic Surgery | Yes |
| A59 | Excision of peripheral nerve                          | Other day-case plastic surgery | Plastic surgery | Plastic Surgery | Yes |
| A62 | Microsurgical repair of peripheral nerve              | Other day-case plastic surgery | Plastic surgery | Plastic Surgery | Yes |
| A64 | Other repair of peripheral nerve                      | Other day-case plastic surgery | Plastic surgery | Plastic Surgery | Yes |
| A75 | Excision of sympathetic nerve                         | Other day-case plastic surgery | Plastic surgery | Plastic Surgery | Yes |
| C10 | Operations on eyebrow                                 | Other day-case plastic surgery | Plastic surgery | Plastic Surgery | Yes |
| E07 | Other plastic operations on nose                      | Other day-case plastic surgery | Plastic surgery | Plastic Surgery | Yes |
| S01 | Plastic excision of skin of head or neck              | Other day-case plastic surgery | Plastic surgery | Plastic Surgery | Yes |
| S03 | Plastic excision of skin of other site                | Other day-case plastic surgery | Plastic surgery | Plastic Surgery | Yes |
| S05 | Microscopically controlled excision of lesion of skin | Other day-case plastic surgery | Plastic surgery | Plastic Surgery | Yes |
| S22 | Sensory flap of skin                                  | Other day-case plastic surgery | Plastic surgery | Plastic Surgery | Yes |
| S23 | Flap operations to relax contracture of skin          | Other day-case plastic surgery | Plastic surgery | Plastic Surgery | Yes |
| S26 | Local subcutaneous pedicle flap of skin               | Other day-case plastic surgery | Plastic surgery | Plastic Surgery | Yes |
| S27 | Other local flap of skin                              | Other day-case plastic surgery | Plastic surgery | Plastic Surgery | Yes |
| S28 | Flap of mucosa                                        | Other day-case plastic surgery | Plastic surgery | Plastic Surgery | Yes |
| S30 | Other operations on flap of skin to head or neck      | Other day-case plastic surgery | Plastic surgery | Plastic Surgery | Yes |
| S31 | Other operations on flap of skin to other site        | Other day-case plastic surgery | Plastic surgery | Plastic Surgery | Yes |
| S33 | Hair bearing graft of skin to scalp                   | Other day-case plastic surgery | Plastic surgery | Plastic Surgery | Yes |
| S35 | Split autograft of skin                               | Other day-case plastic surgery | Plastic surgery | Plastic Surgery | Yes |
| S36 | Other autograft of skin                               | Other day-case plastic surgery | Plastic surgery | Plastic Surgery | Yes |
| S37 | Other graft of skin                                   | Other day-case plastic surgery | Plastic surgery | Plastic Surgery | Yes |
| S38 | Graft of mucosa                                       | Other day-case plastic surgery | Plastic surgery | Plastic Surgery | Yes |
| S39 | Graft of other tissue to skin                         | Other day-case plastic surgery | Plastic surgery | Plastic Surgery | Yes |
| S40 | Other closure of skin                                 | Other day-case plastic surgery | Plastic surgery | Plastic Surgery | Yes |
| S41 | Suture of skin of head or neck                        | Other day-case plastic surgery | Plastic surgery | Plastic Surgery | Yes |

|     |                                                                       |                                 |                 |                 |     |
|-----|-----------------------------------------------------------------------|---------------------------------|-----------------|-----------------|-----|
| S42 | Suture of skin of other site                                          | Other day-case plastic surgery  | Plastic surgery | Plastic Surgery | Yes |
| S43 | Removal of repair material from skin                                  | Other day-case plastic surgery  | Plastic surgery | Plastic Surgery | Yes |
| S47 | Opening of skin                                                       | Other day-case plastic surgery  | Plastic surgery | Plastic Surgery | Yes |
| S49 | Attention to skin expander in subcutaneous tissue                     | Other day-case plastic surgery  | Plastic surgery | Plastic Surgery | Yes |
| S54 | Exploration of burnt skin of head or neck                             | Other day-case plastic surgery  | Plastic surgery | Plastic Surgery | Yes |
| S55 | Exploration of burnt skin of other site                               | Other day-case plastic surgery  | Plastic surgery | Plastic Surgery | Yes |
| S56 | Exploration of other skin of head or neck                             | Other day-case plastic surgery  | Plastic surgery | Plastic Surgery | Yes |
| S57 | Exploration of other skin of other site                               | Other day-case plastic surgery  | Plastic surgery | Plastic Surgery | Yes |
| S60 | Other operations on skin                                              | Other day-case plastic surgery  | Plastic surgery | Plastic Surgery | Yes |
| S62 | Other operations on subcutaneous tissue                               | Other day-case plastic surgery  | Plastic surgery | Plastic Surgery | Yes |
| S63 | Operations on subcutaneous tissue                                     | Other day-case plastic surgery  | Plastic surgery | Plastic Surgery | Yes |
| A63 | Other graft to peripheral nerve                                       | Other inpatient plastic surgery | Plastic surgery | Plastic Surgery | No  |
| B38 | Reconstruction of breast using flap of skin of buttock                | Other inpatient plastic surgery | Plastic surgery | Plastic Surgery | No  |
| B39 | Reconstruction of breast using abdominal flap                         | Other inpatient plastic surgery | Plastic surgery | Plastic Surgery | No  |
| S02 | Plastic excision of skin of abdominal wall                            | Other inpatient plastic surgery | Plastic surgery | Plastic Surgery | No  |
| S17 | Distant flap of skin and muscle                                       | Other inpatient plastic surgery | Plastic surgery | Plastic Surgery | No  |
| S18 | Distant flap of skin and fascia                                       | Other inpatient plastic surgery | Plastic surgery | Plastic Surgery | No  |
| S19 | Distant pedicle flap of skin                                          | Other inpatient plastic surgery | Plastic surgery | Plastic Surgery | No  |
| S20 | Other distant flap of skin                                            | Other inpatient plastic surgery | Plastic surgery | Plastic Surgery | No  |
| S21 | Hair bearing flap of skin                                             | Other inpatient plastic surgery | Plastic surgery | Plastic Surgery | No  |
| S24 | Local flap of skin and muscle                                         | Other inpatient plastic surgery | Plastic surgery | Plastic Surgery | No  |
| S25 | Local flap of skin and fascia                                         | Other inpatient plastic surgery | Plastic surgery | Plastic Surgery | No  |
| S29 | Distant flap of skin and bone                                         | Other inpatient plastic surgery | Plastic surgery | Plastic Surgery | No  |
| S32 | Distant flap of skin and multiple tissues                             | Other inpatient plastic surgery | Plastic surgery | Plastic Surgery | No  |
| S34 | Hair bearing graft of skin to other site                              | Other inpatient plastic surgery | Plastic surgery | Plastic Surgery | No  |
| S48 | Insertion of skin expander into subcutaneous tissue                   | Other inpatient plastic surgery | Plastic surgery | Plastic Surgery | No  |
| V01 | Plastic repair of cranium                                             | Other inpatient plastic surgery | Plastic surgery | Plastic Surgery | No  |
| V02 | Other plastic repair of cranium                                       | Other inpatient plastic surgery | Plastic surgery | Plastic Surgery | No  |
| C12 | Extirpation of lesion of eyelid                                       | Procedure on eyelid             | Plastic surgery | Plastic Surgery | Yes |
| C13 | Excision of redundant skin of eyelid                                  | Procedure on eyelid             | Plastic surgery | Plastic Surgery | Yes |
| C14 | Reconstruction of eyelid                                              | Procedure on eyelid             | Plastic surgery | Plastic Surgery | Yes |
| C15 | Correction of deformity of eyelid                                     | Procedure on eyelid             | Plastic surgery | Plastic Surgery | Yes |
| C16 | Other plastic repair of eyelid                                        | Procedure on eyelid             | Plastic surgery | Plastic Surgery | Yes |
| C17 | Other repair of eyelid                                                | Procedure on eyelid             | Plastic surgery | Plastic Surgery | Yes |
| C18 | Correction of ptosis of eyelid                                        | Procedure on eyelid             | Plastic surgery | Plastic Surgery | Yes |
| C19 | Incision of eyelid                                                    | Procedure on eyelid             | Plastic surgery | Plastic Surgery | Yes |
| C20 | Protective suture of eyelid                                           | Procedure on eyelid             | Plastic surgery | Plastic Surgery | Yes |
| C22 | Other operations on eyelid                                            | Procedure on eyelid             | Plastic surgery | Plastic Surgery | Yes |
| C23 | Operations on eyelid                                                  | Procedure on eyelid             | Plastic surgery | Plastic Surgery | Yes |
| F01 | Partial excision of lip                                               | Procedure on lip                | Plastic surgery | Plastic Surgery | Yes |
| F02 | Extirpation of lesion of lip                                          | Procedure on lip                | Plastic surgery | Plastic Surgery | Yes |
| F03 | Correction of deformity of lip                                        | Procedure on lip                | Plastic surgery | Plastic Surgery | No  |
| F04 | Other reconstruction of lip                                           | Procedure on lip                | Plastic surgery | Plastic Surgery | Yes |
| F05 | Other repair of lip                                                   | Procedure on lip                | Plastic surgery | Plastic Surgery | Yes |
| F06 | Other operations on lip                                               | Procedure on lip                | Plastic surgery | Plastic Surgery | Yes |
| O19 | Other therapeutic endoscopic operations on other joint structure      | Arthroscopic procedures         | Orthopaedics    | Orthopaedics    | Yes |
| W82 | Therapeutic endoscopic operations on semilunar cartilage              | Arthroscopic procedures         | Orthopaedics    | Orthopaedics    | Yes |
| W83 | Therapeutic endoscopic operations on other articular cartilage        | Arthroscopic procedures         | Orthopaedics    | Orthopaedics    | Yes |
| W84 | Therapeutic endoscopic operations on other joint structure            | Arthroscopic procedures         | Orthopaedics    | Orthopaedics    | Yes |
| W85 | Therapeutic endoscopic operations on cavity of knee joint             | Arthroscopic procedures         | Orthopaedics    | Orthopaedics    | Yes |
| W86 | Therapeutic endoscopic operations on cavity of other joint            | Arthroscopic procedures         | Orthopaedics    | Orthopaedics    | Yes |
| W87 | Diagnostic endoscopic examination of knee joint                       | Arthroscopic procedures         | Orthopaedics    | Orthopaedics    | Yes |
| W88 | Diagnostic endoscopic examination of other joint                      | Arthroscopic procedures         | Orthopaedics    | Orthopaedics    | Yes |
| W89 | Other therapeutic endoscopic operations on other articular cartilage  | Arthroscopic procedures         | Orthopaedics    | Orthopaedics    | Yes |
| O27 | Other stabilising operations on joint                                 | day-case procedures on joint    | Orthopaedics    | Orthopaedics    | Yes |
| W44 | Total prosthetic replacement of other joint not using cement          | day-case procedures on joint    | Orthopaedics    | Orthopaedics    | Yes |
| W45 | Other total prosthetic replacement of other joint                     | day-case procedures on joint    | Orthopaedics    | Orthopaedics    | Yes |
| W53 | Prosthetic replacement of articulation of other bone not using cement | day-case procedures on joint    | Orthopaedics    | Orthopaedics    | Yes |
| W54 | Other prosthetic replacement of articulation of other bone            | day-case procedures on joint    | Orthopaedics    | Orthopaedics    | Yes |
| W55 | Prosthetic interposition reconstruction of joint                      | day-case procedures on joint    | Orthopaedics    | Orthopaedics    | Yes |
| W56 | Other interposition reconstruction of joint                           | day-case procedures on joint    | Orthopaedics    | Orthopaedics    | Yes |
| W57 | Excision reconstruction of joint                                      | day-case procedures on joint    | Orthopaedics    | Orthopaedics    | Yes |
| W69 | Open operations on synovial membrane of joint                         | day-case procedures on joint    | Orthopaedics    | Orthopaedics    | Yes |
| W71 | Other open operations on intra-articular structure                    | day-case procedures on joint    | Orthopaedics    | Orthopaedics    | Yes |
| W77 | Stabilising operations on joint                                       | day-case procedures on joint    | Orthopaedics    | Orthopaedics    | Yes |
| W78 | Release of contracture of joint                                       | day-case procedures on joint    | Orthopaedics    | Orthopaedics    | Yes |
| W79 | Soft tissue operations on joint of toe                                | day-case procedures on joint    | Orthopaedics    | Orthopaedics    | Yes |
| W80 | Debridement and irrigation of joint                                   | day-case procedures on joint    | Orthopaedics    | Orthopaedics    | Yes |
| W81 | Other open operations on joint                                        | day-case procedures on joint    | Orthopaedics    | Orthopaedics    | Yes |
| W91 | Other manipulation of joint                                           | day-case procedures on joint    | Orthopaedics    | Orthopaedics    | Yes |

|     |                                                                                |                                 |              |              |     |
|-----|--------------------------------------------------------------------------------|---------------------------------|--------------|--------------|-----|
| W92 | Other operations on joint                                                      | day-case procedures on joint    | Orthopaedics | Orthopaedics | Yes |
| V22 | Primary decompression operations on cervical spine                             | Decompression of cervical spine | Orthopaedics | Orthopaedics | No  |
| V25 | Primary decompression operations on lumbar spine                               | Decompression of lumbar spine   | Orthopaedics | Orthopaedics | No  |
| O29 | Excision of bone                                                               | Division or excision of bone    | Orthopaedics | Orthopaedics | Yes |
| W06 | Total excision of bone                                                         | Division or excision of bone    | Orthopaedics | Orthopaedics | Yes |
| W07 | Excision of ectopic bone                                                       | Division or excision of bone    | Orthopaedics | Orthopaedics | Yes |
| W08 | Other excision of bone                                                         | Division or excision of bone    | Orthopaedics | Orthopaedics | Yes |
| W09 | Extirpation of lesion of bone                                                  | Division or excision of bone    | Orthopaedics | Orthopaedics | Yes |
| W12 | Angulation periarticular division of bone                                      | Division or excision of bone    | Orthopaedics | Orthopaedics | No  |
| W13 | Other periarticular division of bone                                           | Division or excision of bone    | Orthopaedics | Orthopaedics | Yes |
| W14 | Diaphyseal division of bone                                                    | Division or excision of bone    | Orthopaedics | Orthopaedics | Yes |
| W15 | Division of bone of foot                                                       | Division or excision of bone    | Orthopaedics | Orthopaedics | Yes |
| W16 | Other division of bone                                                         | Division or excision of bone    | Orthopaedics | Orthopaedics | No  |
| T59 | Excision of ganglion                                                           | Excision of ganglion            | Orthopaedics | Orthopaedics | Yes |
| T60 | Re-excision of ganglion                                                        | Excision of ganglion            | Orthopaedics | Orthopaedics | Yes |
| T61 | Other operations on ganglion                                                   | Excision of ganglion            | Orthopaedics | Orthopaedics | Yes |
| T52 | Excision of other fascia                                                       | Fasciectomy, fasciotomy         | Orthopaedics | Orthopaedics | Yes |
| T53 | Extirpation of lesion of fascia                                                | Fasciectomy, fasciotomy         | Orthopaedics | Orthopaedics | Yes |
| T54 | Division of fascia                                                             | Fasciectomy, fasciotomy         | Orthopaedics | Orthopaedics | Yes |
| T55 | Release of fascia                                                              | Fasciectomy, fasciotomy         | Orthopaedics | Orthopaedics | Yes |
| T56 | Other excision of other fascia                                                 | Fasciectomy, fasciotomy         | Orthopaedics | Orthopaedics | Yes |
| T57 | Other operations on fascia                                                     | Fasciectomy, fasciotomy         | Orthopaedics | Orthopaedics | Yes |
| O17 | Secondary closed reduction of fracture of bone and internal fixation           | Fracture-related surgery        | Orthopaedics | Orthopaedics | Yes |
| W19 | Primary open reduction of fracture of bone and intramedullary fixation         | Fracture-related surgery        | Orthopaedics | Orthopaedics | Yes |
| W20 | Primary open reduction of fracture of bone and extramedullary fixation         | Fracture-related surgery        | Orthopaedics | Orthopaedics | No  |
| W21 | Primary open reduction of intra-articular fracture of bone                     | Fracture-related surgery        | Orthopaedics | Orthopaedics | Yes |
| W22 | Other primary open reduction of fracture of bone                               | Fracture-related surgery        | Orthopaedics | Orthopaedics | Yes |
| W23 | Secondary open reduction of fracture of bone                                   | Fracture-related surgery        | Orthopaedics | Orthopaedics | No  |
| W24 | Closed reduction of fracture of bone and internal fixation                     | Fracture-related surgery        | Orthopaedics | Orthopaedics | Yes |
| W25 | Closed reduction of fracture of bone and external fixation                     | Fracture-related surgery        | Orthopaedics | Orthopaedics | No  |
| W26 | Other closed reduction of fracture of bone                                     | Fracture-related surgery        | Orthopaedics | Orthopaedics | Yes |
| W28 | Other internal fixation of bone                                                | Fracture-related surgery        | Orthopaedics | Orthopaedics | Yes |
| W30 | Other external fixation of bone                                                | Fracture-related surgery        | Orthopaedics | Orthopaedics | Yes |
| W65 | Primary open reduction of traumatic dislocation of joint                       | Fracture-related surgery        | Orthopaedics | Orthopaedics | Yes |
| W66 | Primary closed reduction of traumatic dislocation of joint                     | Fracture-related surgery        | Orthopaedics | Orthopaedics | Yes |
| W67 | Secondary reduction of traumatic dislocation of joint                          | Fracture-related surgery        | Orthopaedics | Orthopaedics | No  |
| W59 | Fusion of joint of toe                                                         | Fusion of joint                 | Orthopaedics | Orthopaedics | Yes |
| W62 | Other primary fusion of other joint                                            | Fusion of joint                 | Orthopaedics | Orthopaedics | Yes |
| O18 | Hybrid prosthetic replacement of knee joint using cement                       | Lower limb joint replacement    | Orthopaedics | Orthopaedics | No  |
| O32 | Total prosthetic replacement of ankle joint                                    | Lower limb joint replacement    | Orthopaedics | Orthopaedics | No  |
| W37 | Total prosthetic replacement of hip joint using cement                         | Lower limb joint replacement    | Orthopaedics | Orthopaedics | No  |
| W38 | Total prosthetic replacement of hip joint not using cement                     | Lower limb joint replacement    | Orthopaedics | Orthopaedics | No  |
| W39 | Other total prosthetic replacement of hip joint                                | Lower limb joint replacement    | Orthopaedics | Orthopaedics | No  |
| W40 | Total prosthetic replacement of knee joint using cement                        | Lower limb joint replacement    | Orthopaedics | Orthopaedics | No  |
| W41 | Total prosthetic replacement of knee joint not using cement                    | Lower limb joint replacement    | Orthopaedics | Orthopaedics | No  |
| W42 | Other total prosthetic replacement of knee joint                               | Lower limb joint replacement    | Orthopaedics | Orthopaedics | No  |
| W46 | Prosthetic replacement of head of femur using cement                           | Lower limb joint replacement    | Orthopaedics | Orthopaedics | No  |
| W47 | Prosthetic replacement of head of femur not using cement                       | Lower limb joint replacement    | Orthopaedics | Orthopaedics | No  |
| W48 | Other prosthetic replacement of head of femur                                  | Lower limb joint replacement    | Orthopaedics | Orthopaedics | No  |
| W93 | Hybrid prosthetic replacement of hip joint using cemented acetabular component | Lower limb joint replacement    | Orthopaedics | Orthopaedics | No  |
| W94 | Hybrid prosthetic replacement of hip joint using cemented femoral component    | Lower limb joint replacement    | Orthopaedics | Orthopaedics | No  |
| W95 | Hybrid prosthetic replacement of hip joint using cement                        | Lower limb joint replacement    | Orthopaedics | Orthopaedics | No  |
| T62 | Operations on bursa                                                            | Operations on bursa             | Orthopaedics | Orthopaedics | Yes |
| O09 | Placement of bone prosthesis                                                   | Other day-case orthopaedics     | Orthopaedics | Orthopaedics | Yes |
| O10 | Complex reconstruction of shoulder                                             | Other day-case orthopaedics     | Orthopaedics | Orthopaedics | Yes |
| W02 | Other complex reconstruction of hand                                           | Other day-case orthopaedics     | Orthopaedics | Orthopaedics | Yes |
| W11 | Other surgical fracture of bone                                                | Other day-case orthopaedics     | Orthopaedics | Orthopaedics | Yes |
| W17 | Other reconstruction of bone                                                   | Other day-case orthopaedics     | Orthopaedics | Orthopaedics | Yes |
| W29 | Skeletal traction of bone                                                      | Other day-case orthopaedics     | Orthopaedics | Orthopaedics | Yes |
| W33 | Other open operations on bone                                                  | Other day-case orthopaedics     | Orthopaedics | Orthopaedics | Yes |
| W68 | Primary reduction of injury to growth plate                                    | Other day-case orthopaedics     | Orthopaedics | Orthopaedics | Yes |
| W70 | Open operations on semilunar cartilage                                         | Other day-case orthopaedics     | Orthopaedics | Orthopaedics | Yes |
| X01 | Replantation of upper limb                                                     | Other day-case orthopaedics     | Orthopaedics | Orthopaedics | Yes |
| X02 | Replantation of lower limb                                                     | Other day-case orthopaedics     | Orthopaedics | Orthopaedics | Yes |
| X20 | Correction of congenital deformity of forearm                                  | Other day-case orthopaedics     | Orthopaedics | Orthopaedics | Yes |
| X21 | Correction of congenital deformity of hand                                     | Other day-case orthopaedics     | Orthopaedics | Orthopaedics | Yes |



|     |                                                                   |                                 |              |              |     |
|-----|-------------------------------------------------------------------|---------------------------------|--------------|--------------|-----|
| X27 | Correction of minor congenital deformity of foot                  | Other day-case orthopaedics     | Orthopaedics | Orthopaedics | Yes |
| A48 | Other operations on spinal cord                                   | Other day-case spinal surgery   | Orthopaedics | Orthopaedics | Yes |
| V47 | Biopsy of spine                                                   | Other day-case spinal surgery   | Orthopaedics | Orthopaedics | Yes |
| V50 | Manipulation of spine                                             | Other day-case spinal surgery   | Orthopaedics | Orthopaedics | Yes |
| V52 | Other operations on intervertebral disc                           | Other day-case spinal surgery   | Orthopaedics | Orthopaedics | Yes |
| V54 | Other operations on spine                                         | Other day-case spinal surgery   | Orthopaedics | Orthopaedics | Yes |
| V55 | Levels of spine                                                   | Other day-case spinal surgery   | Orthopaedics | Orthopaedics | Yes |
| O35 | Open operations on joint                                          | Other inpatient orthopaedics    | Orthopaedics | Orthopaedics | No  |
| W01 | Complex reconstruction of thumb                                   | Other inpatient orthopaedics    | Orthopaedics | Orthopaedics | No  |
| W05 | Prosthetic replacement of bone                                    | Other inpatient orthopaedics    | Orthopaedics | Orthopaedics | No  |
| W10 | Open surgical fracture of bone                                    | Other inpatient orthopaedics    | Orthopaedics | Orthopaedics | No  |
| W18 | Drainage of bone                                                  | Other inpatient orthopaedics    | Orthopaedics | Orthopaedics | No  |
| W27 | Fixation of epiphysis                                             | Other inpatient orthopaedics    | Orthopaedics | Orthopaedics | No  |
| W31 | Other autograft of bone                                           | Other inpatient orthopaedics    | Orthopaedics | Orthopaedics | No  |
| W32 | Other graft of bone                                               | Other inpatient orthopaedics    | Orthopaedics | Orthopaedics | No  |
| W43 | Total prosthetic replacement of other joint using cement          | Other inpatient orthopaedics    | Orthopaedics | Orthopaedics | No  |
| W52 | Prosthetic replacement of articulation of other bone using cement | Other inpatient orthopaedics    | Orthopaedics | Orthopaedics | No  |
| W60 | Fusion of other joint and extra-articular bone graft              | Other inpatient orthopaedics    | Orthopaedics | Orthopaedics | No  |
| W61 | Fusion of other joint and other articular bone graft              | Other inpatient orthopaedics    | Orthopaedics | Orthopaedics | No  |
| W63 | Revisional fusion of other joint                                  | Other inpatient orthopaedics    | Orthopaedics | Orthopaedics | No  |
| W64 | Conversion to fusion of other joint                               | Other inpatient orthopaedics    | Orthopaedics | Orthopaedics | No  |
| X05 | Implantation of prosthesis for limb                               | Other inpatient orthopaedics    | Orthopaedics | Orthopaedics | No  |
| X19 | Correction of congenital deformity of shoulder or upper arm       | Other inpatient orthopaedics    | Orthopaedics | Orthopaedics | No  |
| X22 | Correction of congenital deformity of hip                         | Other inpatient orthopaedics    | Orthopaedics | Orthopaedics | No  |
| X23 | Correction of congenital deformity of leg                         | Other inpatient orthopaedics    | Orthopaedics | Orthopaedics | No  |
| X24 | Primary correction of congenital deformity of foot                | Other inpatient orthopaedics    | Orthopaedics | Orthopaedics | No  |
| X25 | Other correction of congenital deformity of foot                  | Other inpatient orthopaedics    | Orthopaedics | Orthopaedics | No  |
| A44 | Partial extirpation of spinal cord                                | Other inpatient spinal surgery  | Orthopaedics | Orthopaedics | No  |
| A45 | Other open operations on spinal cord                              | Other inpatient spinal surgery  | Orthopaedics | Orthopaedics | No  |
| A47 | Other destruction of spinal cord                                  | Other inpatient spinal surgery  | Orthopaedics | Orthopaedics | No  |
| A49 | Repair of spina bifida                                            | Other inpatient spinal surgery  | Orthopaedics | Orthopaedics | No  |
| A51 | Other operations on meninges of spinal cord                       | Other inpatient spinal surgery  | Orthopaedics | Orthopaedics | No  |
| V23 | Revisional decompression operations on cervical spine             | Other inpatient spinal surgery  | Orthopaedics | Orthopaedics | No  |
| V24 | Decompression operations on thoracic spine                        | Other inpatient spinal surgery  | Orthopaedics | Orthopaedics | No  |
| V26 | Revisional decompression operations on lumbar spine               | Other inpatient spinal surgery  | Orthopaedics | Orthopaedics | No  |
| V27 | Decompression operations on unspecified spine                     | Other inpatient spinal surgery  | Orthopaedics | Orthopaedics | No  |
| V28 | Insertion of lumbar interspinous process spacer                   | Other inpatient spinal surgery  | Orthopaedics | Orthopaedics | No  |
| V29 | Primary excision of cervical intervertebral disc                  | Other inpatient spinal surgery  | Orthopaedics | Orthopaedics | No  |
| V30 | Revisional excision of cervical intervertebral disc               | Other inpatient spinal surgery  | Orthopaedics | Orthopaedics | No  |
| V31 | Primary excision of thoracic intervertebral disc                  | Other inpatient spinal surgery  | Orthopaedics | Orthopaedics | No  |
| V32 | Revisional excision of thoracic intervertebral disc               | Other inpatient spinal surgery  | Orthopaedics | Orthopaedics | No  |
| V33 | Primary excision of lumbar intervertebral disc                    | Other inpatient spinal surgery  | Orthopaedics | Orthopaedics | No  |
| V34 | Revisional excision of lumbar intervertebral disc                 | Other inpatient spinal surgery  | Orthopaedics | Orthopaedics | No  |
| V35 | Excision of unspecified intervertebral disc                       | Other inpatient spinal surgery  | Orthopaedics | Orthopaedics | No  |
| V36 | Prosthetic replacement of intervertebral disc                     | Other inpatient spinal surgery  | Orthopaedics | Orthopaedics | No  |
| V40 | Stabilisation of spine                                            | Other inpatient spinal surgery  | Orthopaedics | Orthopaedics | No  |
| V41 | Instrumental correction of deformity of spine                     | Other inpatient spinal surgery  | Orthopaedics | Orthopaedics | No  |
| V42 | Other correction of deformity of spine                            | Other inpatient spinal surgery  | Orthopaedics | Orthopaedics | No  |
| V43 | Extirpation of lesion of spine                                    | Other inpatient spinal surgery  | Orthopaedics | Orthopaedics | No  |
| V44 | Decompression of fracture of spine                                | Other inpatient spinal surgery  | Orthopaedics | Orthopaedics | No  |
| V45 | Other reduction of fracture of spine                              | Other inpatient spinal surgery  | Orthopaedics | Orthopaedics | No  |
| V46 | Fixation of fracture of spine                                     | Other inpatient spinal surgery  | Orthopaedics | Orthopaedics | No  |
| V49 | Exploration of spine                                              | Other inpatient spinal surgery  | Orthopaedics | Orthopaedics | No  |
| V51 | Other primary excision of lumbar intervertebral disc              | Other inpatient spinal surgery  | Orthopaedics | Orthopaedics | No  |
| V56 | Primary foraminoplasty of spine                                   | Other inpatient spinal surgery  | Orthopaedics | Orthopaedics | No  |
| V57 | Revisional foraminoplasty of spine                                | Other inpatient spinal surgery  | Orthopaedics | Orthopaedics | No  |
| V67 | Other primary decompression operations on lumbar spine            | Other inpatient spinal surgery  | Orthopaedics | Orthopaedics | No  |
| V68 | Other revisional decompression operations on lumbar spine         | Other inpatient spinal surgery  | Orthopaedics | Orthopaedics | No  |
| V69 | Other primary decompression operations on cervical spine          | Other inpatient spinal surgery  | Orthopaedics | Orthopaedics | No  |
| V70 | Other revisional decompression operations on cervical spine       | Other inpatient spinal surgery  | Orthopaedics | Orthopaedics | No  |
| W58 | Other reconstruction of joint                                     | Other reconstruction of joint   | Orthopaedics | Orthopaedics | No  |
| S64 | Extirpation of nail bed                                           | Procedures on nail, nail bed    | Orthopaedics | Orthopaedics | Yes |
| S66 | Other operations on nail bed                                      | Procedures on nail, nail bed    | Orthopaedics | Orthopaedics | Yes |
| S68 | Excision of nail                                                  | Procedures on nail, nail bed    | Orthopaedics | Orthopaedics | Yes |
| S70 | Other operations on nail                                          | Procedures on nail, nail bed    | Orthopaedics | Orthopaedics | Yes |
| A60 | Destruction of peripheral nerve                                   | Procedures on peripheral nerves | Orthopaedics | Orthopaedics | Yes |
| A61 | Extirpation of lesion of peripheral nerve                         | Procedures on peripheral nerves | Orthopaedics | Orthopaedics | Yes |
| A65 | Release of entrapment of peripheral nerve at wrist                | Procedures on peripheral nerves | Orthopaedics | Orthopaedics | Yes |

|     |                                                                                  |                                     |              |              |     |
|-----|----------------------------------------------------------------------------------|-------------------------------------|--------------|--------------|-----|
| A66 | Release of entrapment of peripheral nerve at ankle                               | Procedures on peripheral nerves     | Orthopaedics | Orthopaedics | Yes |
| A67 | Release of entrapment of peripheral nerve at other site                          | Procedures on peripheral nerves     | Orthopaedics | Orthopaedics | Yes |
| A68 | Other release of peripheral nerve                                                | Procedures on peripheral nerves     | Orthopaedics | Orthopaedics | Yes |
| A69 | Revision of release of peripheral nerve                                          | Procedures on peripheral nerves     | Orthopaedics | Orthopaedics | Yes |
| A73 | Other operations on peripheral nerve                                             | Procedures on peripheral nerves     | Orthopaedics | Orthopaedics | Yes |
| W03 | Complex reconstruction of forefoot                                               | Reconstruction of foot              | Orthopaedics | Orthopaedics | Yes |
| W04 | Complex reconstruction of hindfoot                                               | Reconstruction of foot              | Orthopaedics | Orthopaedics | No  |
| V37 | Primary fusion of joint of cervical spine                                        | Spinal fusion                       | Orthopaedics | Orthopaedics | No  |
| V38 | Primary fusion of other joint of spine                                           | Spinal fusion                       | Orthopaedics | Orthopaedics | No  |
| V39 | Revisional fusion of joint of spine                                              | Spinal fusion                       | Orthopaedics | Orthopaedics | No  |
| V66 | Other revisional fusion of joint of spine                                        | Spinal fusion                       | Orthopaedics | Orthopaedics | No  |
| A57 | Operations on spinal nerve root                                                  | Spinal nerve root procedure         | Orthopaedics | Orthopaedics | Yes |
| V48 | Denervation of spinal facet joint of vertebra                                    | Spinal nerve root procedure         | Orthopaedics | Orthopaedics | Yes |
| T64 | Transposition of tendon                                                          | Surgery on ligament, tendon, muscle | Orthopaedics | Orthopaedics | Yes |
| T65 | Excision of tendon                                                               | Surgery on ligament, tendon, muscle | Orthopaedics | Orthopaedics | Yes |
| T67 | Primary repair of tendon                                                         | Surgery on ligament, tendon, muscle | Orthopaedics | Orthopaedics | Yes |
| T68 | Secondary repair of tendon                                                       | Surgery on ligament, tendon, muscle | Orthopaedics | Orthopaedics | Yes |
| T69 | Freeing of tendon                                                                | Surgery on ligament, tendon, muscle | Orthopaedics | Orthopaedics | Yes |
| T70 | Adjustment to length of tendon                                                   | Surgery on ligament, tendon, muscle | Orthopaedics | Orthopaedics | Yes |
| T71 | Excision of sheath of tendon                                                     | Surgery on ligament, tendon, muscle | Orthopaedics | Orthopaedics | Yes |
| T72 | Other operations on sheath of tendon                                             | Surgery on ligament, tendon, muscle | Orthopaedics | Orthopaedics | Yes |
| T74 | Other operations on tendon                                                       | Surgery on ligament, tendon, muscle | Orthopaedics | Orthopaedics | Yes |
| T76 | Transplantation of muscle                                                        | Surgery on ligament, tendon, muscle | Orthopaedics | Orthopaedics | No  |
| T77 | Excision of muscle                                                               | Surgery on ligament, tendon, muscle | Orthopaedics | Orthopaedics | No  |
| T79 | Repair of muscle                                                                 | Surgery on ligament, tendon, muscle | Orthopaedics | Orthopaedics | Yes |
| T80 | Release of contracture of muscle                                                 | Surgery on ligament, tendon, muscle | Orthopaedics | Orthopaedics | Yes |
| T81 | Biopsy of muscle                                                                 | Surgery on ligament, tendon, muscle | Orthopaedics | Orthopaedics | Yes |
| T83 | Other operations on muscle                                                       | Surgery on ligament, tendon, muscle | Orthopaedics | Orthopaedics | Yes |
| W72 | Prosthetic replacement of ligament                                               | Surgery on ligament, tendon, muscle | Orthopaedics | Orthopaedics | Yes |
| W73 | Prosthetic reinforcement of ligament                                             | Surgery on ligament, tendon, muscle | Orthopaedics | Orthopaedics | Yes |
| W74 | Other reconstruction of ligament                                                 | Surgery on ligament, tendon, muscle | Orthopaedics | Orthopaedics | Yes |
| W75 | Other open repair of ligament                                                    | Surgery on ligament, tendon, muscle | Orthopaedics | Orthopaedics | Yes |
| W76 | Other operations on ligament                                                     | Surgery on ligament, tendon, muscle | Orthopaedics | Orthopaedics | Yes |
| O06 | Hybrid prosthetic replacement of shoulder joint using cemented humeral component | Upper limb joint replacement        | Orthopaedics | Orthopaedics | No  |
| O07 | Hybrid prosthetic replacement of shoulder joint using cemented glenoid component | Upper limb joint replacement        | Orthopaedics | Orthopaedics | No  |
| O08 | Hybrid prosthetic replacement of shoulder joint using cement                     | Upper limb joint replacement        | Orthopaedics | Orthopaedics | No  |
| O21 | Total prosthetic replacement of elbow joint using cement                         | Upper limb joint replacement        | Orthopaedics | Orthopaedics | No  |
| O22 | Total prosthetic replacement of elbow joint not using cement                     | Upper limb joint replacement        | Orthopaedics | Orthopaedics | No  |
| O23 | Total prosthetic replacement of elbow joint                                      | Upper limb joint replacement        | Orthopaedics | Orthopaedics | No  |
| O24 | Prosthetic replacement of head of radius using cement                            | Upper limb joint replacement        | Orthopaedics | Orthopaedics | No  |
| O25 | Prosthetic replacement of head of radius not using cement                        | Upper limb joint replacement        | Orthopaedics | Orthopaedics | No  |
| O26 | Other prosthetic replacement of head of radius                                   | Upper limb joint replacement        | Orthopaedics | Orthopaedics | No  |
| O37 | Reverse polarity total prosthetic replacement of shoulder joint using cement     | Upper limb joint replacement        | Orthopaedics | Orthopaedics | No  |
| O38 | Reverse polarity total prosthetic replacement of shoulder joint not using cement | Upper limb joint replacement        | Orthopaedics | Orthopaedics | No  |

|     |                                                                               |                                                    |              |              |     |
|-----|-------------------------------------------------------------------------------|----------------------------------------------------|--------------|--------------|-----|
| O39 | Reverse polarity total prosthetic replacement of shoulder joint               | Upper limb joint replacement                       | Orthopaedics | Orthopaedics | No  |
| O40 | Reverse polarity hybrid prosthetic replacement of shoulder joint using cement | Upper limb joint replacement                       | Orthopaedics | Orthopaedics | No  |
| W49 | Prosthetic replacement of head of humerus using cement                        | Upper limb joint replacement                       | Orthopaedics | Orthopaedics | No  |
| W50 | Prosthetic replacement of head of humerus not using cement                    | Upper limb joint replacement                       | Orthopaedics | Orthopaedics | No  |
| W51 | Other prosthetic replacement of head of humerus                               | Upper limb joint replacement                       | Orthopaedics | Orthopaedics | No  |
| W96 | Total prosthetic replacement of shoulder joint using cement                   | Upper limb joint replacement                       | Orthopaedics | Orthopaedics | No  |
| W97 | Total prosthetic replacement of shoulder joint not using cement               | Upper limb joint replacement                       | Orthopaedics | Orthopaedics | No  |
| W98 | Total prosthetic replacement of shoulder joint                                | Upper limb joint replacement                       | Orthopaedics | Orthopaedics | No  |
| N30 | Operations on prepuce                                                         | Circumcision, prepuceplasty                        | Urology      | Urology      | Yes |
| M34 | Total excision of bladder                                                     | Cystectomy                                         | Urology      | Urology      | No  |
| M35 | Partial excision of bladder                                                   | Cystectomy                                         | Urology      | Urology      | No  |
| M14 | Extracorporeal fragmentation of calculus of kidney                            | Extracorporeal fragmentation of calculus of kidney | Urology      | Urology      | Yes |
| N17 | Excision of vas deferens                                                      | Male sterilisation                                 | Urology      | Urology      | Yes |
| M02 | Total excision of kidney                                                      | Nephrectomy, uretectomy                            | Urology      | Urology      | No  |
| M03 | Partial excision of kidney                                                    | Nephrectomy, uretectomy                            | Urology      | Urology      | No  |
| M18 | Excision of ureter                                                            | Nephrectomy, uretectomy                            | Urology      | Urology      | No  |
| M36 | Enlargement of bladder                                                        | Operations on bladder                              | Urology      | Urology      | No  |
| M37 | Other repair of bladder                                                       | Operations on bladder                              | Urology      | Urology      | No  |
| M43 | Endoscopic operations to increase capacity of bladder                         | Operations on bladder                              | Urology      | Urology      | Yes |
| M48 | Operations on bladder                                                         | Operations on bladder                              | Urology      | Urology      | Yes |
| M49 | Other operations on bladder                                                   | Operations on bladder                              | Urology      | Urology      | Yes |
| M65 | Endoscopic resection of outlet of male bladder                                | Operations on bladder                              | Urology      | Urology      | No  |
| M70 | Other operations on outlet of male bladder                                    | Operations on bladder                              | Urology      | Urology      | Yes |
| M16 | Other operations on kidney                                                    | Other day-case urology                             | Urology      | Urology      | Yes |
| M22 | Repair of ureter                                                              | Other day-case urology                             | Urology      | Urology      | Yes |
| M28 | Other endoscopic removal of calculus from ureter                              | Other day-case urology                             | Urology      | Urology      | Yes |
| M31 | Extracorporeal fragmentation of calculus of ureter                            | Other day-case urology                             | Urology      | Urology      | Yes |
| M32 | Operations on ureteric orifice                                                | Other day-case urology                             | Urology      | Urology      | Yes |
| M62 | Other open operations on prostate                                             | Other day-case urology                             | Urology      | Urology      | Yes |
| M71 | Other operations on prostate                                                  | Other day-case urology                             | Urology      | Urology      | Yes |
| M75 | Other open operations on urethra                                              | Other day-case urology                             | Urology      | Urology      | Yes |
| M79 | Other operations on urethra                                                   | Other day-case urology                             | Urology      | Urology      | Yes |
| M81 | Operations on urethral orifice                                                | Other day-case urology                             | Urology      | Urology      | Yes |
| M83 | Other operations on urinary tract                                             | Other day-case urology                             | Urology      | Urology      | Yes |
| N01 | Extirpation of scrotum                                                        | Other day-case urology                             | Urology      | Urology      | Yes |
| N20 | Other operations on spermatic cord                                            | Other day-case urology                             | Urology      | Urology      | Yes |
| N22 | Operations on seminal vesicle                                                 | Other day-case urology                             | Urology      | Urology      | Yes |
| N24 | Operations on male perineum                                                   | Other day-case urology                             | Urology      | Urology      | Yes |
| N27 | Extirpation of lesion of penis                                                | Other day-case urology                             | Urology      | Urology      | Yes |
| N28 | Plastic operations on penis                                                   | Other day-case urology                             | Urology      | Urology      | Yes |
| N32 | Other operations on penis                                                     | Other day-case urology                             | Urology      | Urology      | Yes |
| N34 | Other operations on male genital tract                                        | Other day-case urology                             | Urology      | Urology      | Yes |
| M04 | Open extirpation of lesion of kidney                                          | Other inpatient urology                            | Urology      | Urology      | No  |
| M05 | Open repair of kidney                                                         | Other inpatient urology                            | Urology      | Urology      | No  |
| M06 | Incision of kidney                                                            | Other inpatient urology                            | Urology      | Urology      | No  |
| M08 | Other open operations on kidney                                               | Other inpatient urology                            | Urology      | Urology      | No  |
| M15 | Operations on kidney along nephrostomy tube track                             | Other inpatient urology                            | Urology      | Urology      | No  |
| M19 | Urinary diversion                                                             | Other inpatient urology                            | Urology      | Urology      | No  |
| M20 | Replantation of ureter                                                        | Other inpatient urology                            | Urology      | Urology      | No  |
| M21 | Other connection of ureter                                                    | Other inpatient urology                            | Urology      | Urology      | No  |
| M23 | Incision of ureter                                                            | Other inpatient urology                            | Urology      | Urology      | No  |
| M24 | Other urinary diversion                                                       | Other inpatient urology                            | Urology      | Urology      | No  |
| M25 | Other open operations on ureter                                               | Other inpatient urology                            | Urology      | Urology      | No  |
| M38 | Open drainage of bladder                                                      | Other inpatient urology                            | Urology      | Urology      | No  |
| M39 | Other open operations on contents of bladder                                  | Other inpatient urology                            | Urology      | Urology      | No  |
| M41 | Other open operations on bladder                                              | Other inpatient urology                            | Urology      | Urology      | No  |
| M54 | Open operations on outlet of female bladder                                   | Other inpatient urology                            | Urology      | Urology      | No  |
| M60 | Open operations on outlet of male bladder                                     | Other inpatient urology                            | Urology      | Urology      | No  |
| M64 | Other open operations on outlet of male bladder                               | Other inpatient urology                            | Urology      | Urology      | No  |
| N26 | Amputation of penis                                                           | Other inpatient urology                            | Urology      | Urology      | No  |
| N29 | Prosthesis of penis                                                           | Other inpatient urology                            | Urology      | Urology      | No  |
| X15 | Operations for sexual transformation                                          | Other inpatient urology                            | Urology      | Urology      | No  |
| X16 | Operations for disorders of sex development                                   | Other inpatient urology                            | Urology      | Urology      | No  |
| M12 | Percutaneous studies of upper urinary tract                                   | Other interventional radiology                     | Urology      | Urology      | Yes |
| M13 | Percutaneous puncture of kidney                                               | Percutaneous puncture of kidney                    | Urology      | Urology      | No  |
| M61 | Open excision of prostate                                                     | Prostatectomy                                      | Urology      | Urology      | No  |
| N03 | Other operations on scrotum                                                   | Scrotal surgery                                    | Urology      | Urology      | Yes |
| N05 | Bilateral excision of testes                                                  | Scrotal surgery                                    | Urology      | Urology      | Yes |
| N06 | Other excision of testis                                                      | Scrotal surgery                                    | Urology      | Urology      | Yes |

|     |                                                                   |                                               |         |         |     |
|-----|-------------------------------------------------------------------|-----------------------------------------------|---------|---------|-----|
| N07 | Extirpation of lesion of testis                                   | Scrotal surgery                               | Urology | Urology | Yes |
| N08 | Bilateral placement of testes in scrotum                          | Scrotal surgery                               | Urology | Urology | Yes |
| N09 | Other placement of testis in scrotum                              | Scrotal surgery                               | Urology | Urology | Yes |
| N10 | Prosthesis of testis                                              | Scrotal surgery                               | Urology | Urology | Yes |
| N11 | Operations on hydrocele sac                                       | Scrotal surgery                               | Urology | Urology | Yes |
| N13 | Other operations on testis                                        | Scrotal surgery                               | Urology | Urology | Yes |
| N15 | Operations on epididymis                                          | Scrotal surgery                               | Urology | Urology | Yes |
| N18 | Repair of spermatic cord                                          | Scrotal surgery                               | Urology | Urology | Yes |
| N19 | Operations on varicocele                                          | Scrotal surgery                               | Urology | Urology | Yes |
| M01 | Transplantation of kidney                                         | Transplant surgery                            | Urology | Urology | No  |
| M17 | Interventions associated with transplantation of kidney           | Transplant surgery                            | Urology | Urology | Yes |
| M33 | Percutaneous ureteric stent procedures                            | Ureteric stent procedures                     | Urology | Urology | No  |
| M07 | Therapeutic ureteroscopic operations on kidney                    | Ureteroscopy, cystoscopy & related procedures | Urology | Urology | No  |
| M09 | Therapeutic endoscopic operations on calculus of kidney           | Ureteroscopy, cystoscopy & related procedures | Urology | Urology | Yes |
| M10 | Other therapeutic endoscopic operations on kidney                 | Ureteroscopy, cystoscopy & related procedures | Urology | Urology | No  |
| M11 | Diagnostic endoscopic examination of kidney                       | Ureteroscopy, cystoscopy & related procedures | Urology | Urology | Yes |
| M26 | Therapeutic nephroscopic operations on ureter                     | Ureteroscopy, cystoscopy & related procedures | Urology | Urology | No  |
| M27 | Therapeutic ureteroscopic operations on ureter                    | Ureteroscopy, cystoscopy & related procedures | Urology | Urology | Yes |
| M29 | Other therapeutic endoscopic operations on ureter                 | Ureteroscopy, cystoscopy & related procedures | Urology | Urology | Yes |
| M30 | Diagnostic endoscopic examination of ureter                       | Ureteroscopy, cystoscopy & related procedures | Urology | Urology | Yes |
| M42 | Endoscopic extirpation of lesion of bladder                       | Ureteroscopy, cystoscopy & related procedures | Urology | Urology | No  |
| M44 | Other therapeutic endoscopic operations on bladder                | Ureteroscopy, cystoscopy & related procedures | Urology | Urology | No  |
| M45 | Diagnostic endoscopic examination of bladder                      | Ureteroscopy, cystoscopy & related procedures | Urology | Urology | Yes |
| M56 | Therapeutic endoscopic operations on outlet of female bladder     | Ureteroscopy, cystoscopy & related procedures | Urology | Urology | Yes |
| M66 | Other therapeutic endoscopic operations on outlet of male bladder | Ureteroscopy, cystoscopy & related procedures | Urology | Urology | No  |
| M67 | Other therapeutic endoscopic operations on prostate               | Ureteroscopy, cystoscopy & related procedures | Urology | Urology | Yes |
| M68 | Endoscopic insertion of prosthesis into prostate                  | Ureteroscopy, cystoscopy & related procedures | Urology | Urology | Yes |
| M76 | Therapeutic endoscopic operations on urethra                      | Ureteroscopy, cystoscopy & related procedures | Urology | Urology | Yes |
| M77 | Diagnostic endoscopic examination of urethra                      | Ureteroscopy, cystoscopy & related procedures | Urology | Urology | Yes |
| M85 | Diagnostic endoscopic examination of urinary diversion            | Ureteroscopy, cystoscopy & related procedures | Urology | Urology | Yes |
| M86 | Therapeutic endoscopic operations on urinary diversion            | Ureteroscopy, cystoscopy & related procedures | Urology | Urology | Yes |
| M72 | Excision of urethra                                               | Urethral surgery                              | Urology | Urology | No  |
| M73 | Repair of urethra                                                 | Urethral surgery                              | Urology | Urology | Yes |

## OPCS: OPCS Classification of Interventions and Procedures

Procedures were categorised as day-case interventions / surgeries based on the HES-APC 2018-19 dataset. Procedures were defined as day-case if their average length of hospital stay was <1 day, or ≥50% of cases were performed on a day-case basis. In addition, K49, K61, K75 were also classified as day-case.

Note: Several procedures were mapped against OPCS codes relating to two or more sub-specialties (example: ileostomy/ colostomy).

**Supplementary Table 2: Baseline data taken from AHES-APC datasets**

| OPCS code | Estimated number of elective procedures |         | Mean length of hospital stay in 2018-19 | Proportion of procedures completed as day-cases in 2018-19 | Average wait (days) on the waiting list for patients operated in 2018-19 |
|-----------|-----------------------------------------|---------|-----------------------------------------|------------------------------------------------------------|--------------------------------------------------------------------------|
|           | 2018-19                                 | 2020-21 |                                         |                                                            |                                                                          |
| A01       | 216                                     | 130     | 7.7                                     | 0.5%                                                       | 72.4                                                                     |
| A02       | 3,963                                   | 3,531   | 6.9                                     | 0.2%                                                       | 23.1                                                                     |
| A03       | 39                                      | 16      | 3.3                                     | 0.0%                                                       | 63.5                                                                     |
| A04       | 526                                     | 387     | 6.0                                     | 9.9%                                                       | 13.3                                                                     |
| A05       | 139                                     | 127     | 17.5                                    | 0.7%                                                       | 29.9                                                                     |
| A06       | 27                                      | 22      | 3.9                                     | 11.2%                                                      | 65.0                                                                     |
| A07       | 98                                      | 69      | 14.4                                    | 1.0%                                                       | 95.9                                                                     |
| A08       | 642                                     | 536     | 5.4                                     | 10.0%                                                      | 10.9                                                                     |
| A10       | 773                                     | 460     | 5.3                                     | 71.9%                                                      | 19.3                                                                     |
| A11       | 502                                     | 318     | 10.4                                    | 0.6%                                                       | 61.6                                                                     |
| A12       | 1,376                                   | 928     | 10.6                                    | 1.0%                                                       | 59.0                                                                     |
| A13       | 356                                     | 298     | 5.3                                     | 7.6%                                                       | 34.9                                                                     |
| A14       | 819                                     | 1,107   | 5.9                                     | 31.4%                                                      | 36.9                                                                     |
| A16       | 93                                      | 116     | 11.6                                    | 0.0%                                                       | 38.8                                                                     |
| A17       | 306                                     | 274     | 7.3                                     | 0.3%                                                       | 40.6                                                                     |
| A18       | 14                                      | 9       | 8.2                                     | 0.0%                                                       | 20.6                                                                     |
| A20       | 614                                     | 380     | 13.1                                    | 13.7%                                                      | 62.5                                                                     |
| A22       | 26                                      | 9       | 9.8                                     | 38.0%                                                      | 33.8                                                                     |
| A24       | 38                                      | 12      | 5.4                                     | 7.9%                                                       | 116.8                                                                    |
| A25       | 8                                       | 4       | 4.6                                     | 12.5%                                                      | 139.6                                                                    |
| A26       | 427                                     | 267     | 0.9                                     | 70.5%                                                      | 66.9                                                                     |
| A27       | 5                                       | 5       | 4.3                                     | 41.7%                                                      | 24.3                                                                     |
| A28       | 54                                      | 30      | 1.1                                     | 76.0%                                                      | 54.8                                                                     |
| A29       | 374                                     | 254     | 8.5                                     | 4.3%                                                       | 87.3                                                                     |
| A30       | 20                                      | 16      | 2.8                                     | 29.6%                                                      | 66.9                                                                     |
| A31       | 48                                      | 14      | 1.0                                     | 64.6%                                                      | 30.4                                                                     |
| A32       | 511                                     | 268     | 3.9                                     | 2.9%                                                       | 106.3                                                                    |
| A34       | 8                                       | 0       | 3.3                                     | 12.9%                                                      | 66.3                                                                     |
| A36       | 557                                     | 438     | 0.5                                     | 84.7%                                                      | 85.1                                                                     |
| A38       | 1,303                                   | 1,182   | 8.6                                     | 0.2%                                                       | 49.7                                                                     |
| A39       | 192                                     | 93      | 7.0                                     | 2.1%                                                       | 86.4                                                                     |
| A40       | 55                                      | 22      | 10.9                                    | 0.0%                                                       | 121.8                                                                    |
| A41       | 973                                     | 663     | 10.7                                    | 0.4%                                                       | 15.7                                                                     |
| A42       | 47                                      | 41      | 7.4                                     | 10.6%                                                      | 43.8                                                                     |
| A43       | 205                                     | 174     | 11.5                                    | 0.5%                                                       | 56.0                                                                     |
| A44       | 612                                     | 491     | 9.0                                     | 0.3%                                                       | 46.5                                                                     |
| A45       | 84                                      | 30      | 11.1                                    | 4.8%                                                       | 64.0                                                                     |
| A47       | 27                                      | 21      | 2.0                                     | 22.2%                                                      | 18.3                                                                     |
| A48       | 3,869                                   | 1,847   | 0.9                                     | 73.9%                                                      | 86.9                                                                     |
| A49       | 278                                     | 173     | 7.6                                     | 1.1%                                                       | 99.6                                                                     |
| A51       | 305                                     | 236     | 8.3                                     | 19.7%                                                      | 98.4                                                                     |
| A57       | 48,974                                  | 19,695  | 0.4                                     | 98.0%                                                      | 104.8                                                                    |
| A59       | 417                                     | 178     | 0.7                                     | 84.8%                                                      | 98.2                                                                     |
| A60       | 5,976                                   | 3,802   | 0.2                                     | 98.5%                                                      | 135.1                                                                    |
| A61       | 4,052                                   | 1,539   | 0.3                                     | 88.4%                                                      | 92.4                                                                     |
| A62       | 2,453                                   | 2,110   | 0.7                                     | 87.6%                                                      | 10.2                                                                     |
| A63       | 36                                      | 23      | 2.1                                     | 42.2%                                                      | 47.5                                                                     |
| A64       | 960                                     | 727     | 0.4                                     | 91.4%                                                      | 5.2                                                                      |
| A65       | 44,564                                  | 20,323  | 0.0                                     | 99.0%                                                      | 72.3                                                                     |
| A66       | 117                                     | 43      | 0.4                                     | 80.3%                                                      | 86.0                                                                     |
| A67       | 4,739                                   | 2,200   | 0.1                                     | 93.0%                                                      | 86.3                                                                     |
| A68       | 1,197                                   | 533     | 0.5                                     | 78.3%                                                      | 86.1                                                                     |
| A69       | 1,479                                   | 604     | 0.1                                     | 95.6%                                                      | 91.7                                                                     |
| A73       | 37,046                                  | 16,201  | 0.3                                     | 97.6%                                                      | 108.8                                                                    |
| A75       | 170                                     | 41      | 1.5                                     | 56.0%                                                      | 78.9                                                                     |
| B01       | 147                                     | 71      | 6.4                                     | 0.0%                                                       | 55.6                                                                     |
| B02       | 0                                       | 0       | -                                       | 0.0%                                                       | 0.0                                                                      |
| B04       | 1,116                                   | 878     | 5.7                                     | 0.3%                                                       | 65.0                                                                     |
| B06       | 26                                      | 29      | 6.6                                     | 0.0%                                                       | 25.3                                                                     |
| B08       | 11,210                                  | 7,799   | 1.7                                     | 5.6%                                                       | 72.2                                                                     |
| B09       | 19                                      | 9       | 2.3                                     | 0.0%                                                       | 33.8                                                                     |
| B10       | 860                                     | 388     | 1.1                                     | 28.6%                                                      | 102.8                                                                    |
| B12       | 2,246                                   | 1,532   | 1.2                                     | 88.6%                                                      | 27.3                                                                     |
| B14       | 4,751                                   | 2,753   | 1.2                                     | 23.8%                                                      | 107.9                                                                    |
| B16       | 85                                      | 65      | 1.1                                     | 29.4%                                                      | 103.7                                                                    |
| B17       | 4                                       | 9       | 17.3                                    | 0.0%                                                       | 1.0                                                                      |

|     |        |        |     |        |       |
|-----|--------|--------|-----|--------|-------|
| B18 | 411    | 339    | 4.1 | 1.0%   | 33.7  |
| B20 | 25     | 24     | 7.5 | 28.0%  | 49.2  |
| B22 | 870    | 633    | 3.6 | 1.3%   | 62.5  |
| B23 | 2      | 4      | 1.0 | 50.0%  | 5.0   |
| B25 | 219    | 185    | 3.1 | 56.6%  | 17.0  |
| B27 | 17,937 | 15,009 | 1.8 | 19.6%  | 33.3  |
| B28 | 42,943 | 32,922 | 0.2 | 80.4%  | 25.3  |
| B29 | 1,416  | 392    | 1.9 | 34.6%  | 123.6 |
| B30 | 3,639  | 1,575  | 1.0 | 53.9%  | 91.7  |
| B31 | 3,963  | 1,544  | 0.9 | 36.1%  | 106.2 |
| B32 | 4,806  | 3,136  | 1.6 | 90.4%  | 19.5  |
| B33 | 700    | 384    | 1.6 | 62.1%  | 47.4  |
| B34 | 2,511  | 1,671  | 0.1 | 93.1%  | 36.0  |
| B35 | 1,165  | 535    | 0.1 | 96.0%  | 46.6  |
| B36 | 2,859  | 727    | 0.1 | 94.5%  | 121.3 |
| B37 | 4,958  | 2,428  | 0.7 | 79.3%  | 119.1 |
| B38 | 7      | 4      | 3.6 | 28.6%  | 19.8  |
| B39 | 1,032  | 284    | 5.0 | 2.0%   | 229.7 |
| B40 | 9      | 0      | 0.0 | 100.0% | 59.6  |
| B41 | 986    | 615    | 0.2 | 80.9%  | 23.5  |
| C01 | 679    | 497    | 2.6 | 17.4%  | 47.3  |
| C02 | 268    | 153    | 0.9 | 64.3%  | 74.4  |
| C03 | 129    | 58     | 0.4 | 71.3%  | 96.0  |
| C04 | 119    | 57     | 0.6 | 70.7%  | 70.9  |
| C05 | 262    | 100    | 1.0 | 41.7%  | 61.1  |
| C06 | 688    | 410    | 1.6 | 39.9%  | 68.5  |
| C08 | 690    | 292    | 1.2 | 26.7%  | 25.1  |
| C09 | 436    | 232    | 0.0 | 97.0%  | 98.5  |
| C10 | 3,814  | 2,491  | 0.3 | 96.6%  | 66.7  |
| C11 | 6,113  | 3,919  | 0.1 | 97.8%  | 66.7  |
| C12 | 20,984 | 10,211 | 0.0 | 98.8%  | 60.8  |
| C13 | 3,396  | 1,580  | 0.0 | 98.2%  | 100.9 |
| C14 | 2,010  | 1,287  | 0.2 | 94.2%  | 63.8  |
| C15 | 12,855 | 6,635  | 0.0 | 98.7%  | 83.7  |
| C16 | 761    | 422    | 1.0 | 93.4%  | 55.2  |
| C17 | 731    | 506    | 0.5 | 93.7%  | 67.6  |
| C18 | 5,349  | 2,406  | 0.0 | 98.6%  | 111.3 |
| C19 | 504    | 193    | 0.5 | 96.4%  | 57.1  |
| C20 | 86     | 43     | 1.7 | 88.5%  | 56.7  |
| C22 | 6,730  | 3,142  | 0.1 | 99.2%  | 58.5  |
| C23 | 253    | 113    | 0.1 | 96.5%  | 97.3  |
| C24 | 301    | 197    | 0.3 | 87.1%  | 63.2  |
| C25 | 3,617  | 1,016  | 0.2 | 80.5%  | 127.4 |
| C26 | 102    | 47     | 0.5 | 84.6%  | 74.4  |
| C27 | 2,880  | 793    | 0.0 | 98.2%  | 90.2  |
| C29 | 3,688  | 1,211  | 0.0 | 99.3%  | 76.4  |
| C31 | 6,848  | 2,536  | 0.0 | 96.7%  | 126.2 |
| C32 | 2,465  | 881    | 0.0 | 96.9%  | 121.0 |
| C33 | 1,066  | 357    | 0.0 | 97.6%  | 114.0 |
| C34 | 250    | 82     | 0.0 | 98.8%  | 95.3  |
| C35 | 312    | 128    | 0.0 | 97.8%  | 109.9 |
| C37 | 816    | 379    | 0.1 | 97.9%  | 100.0 |
| C39 | 2,710  | 1,193  | 0.1 | 96.9%  | 71.6  |
| C40 | 386    | 215    | 0.4 | 90.4%  | 62.5  |
| C41 | 44     | 18     | 0.5 | 91.0%  | 80.7  |
| C43 | 1,166  | 620    | 0.2 | 98.3%  | 44.4  |
| C44 | 2,569  | 1,498  | 0.4 | 71.9%  | 113.1 |
| C45 | 1,557  | 883    | 0.3 | 97.5%  | 80.6  |
| C46 | 3,462  | 1,910  | 0.7 | 77.1%  | 97.9  |
| C47 | 1,787  | 1,080  | 0.6 | 96.8%  | 59.7  |
| C49 | 203    | 106    | 0.0 | 97.5%  | 78.7  |
| C51 | 3,002  | 1,952  | 0.6 | 97.8%  | 80.2  |
| C52 | 465    | 321    | 0.0 | 96.8%  | 59.8  |
| C53 | 25     | 8      | 0.0 | 96.0%  | 67.3  |
| C54 | 716    | 553    | 0.2 | 85.3%  | 27.1  |
| C55 | 39     | 33     | 1.2 | 74.7%  | 27.6  |
| C57 | 249    | 182    | 0.7 | 84.9%  | 27.9  |
| C59 | 116    | 76     | 0.4 | 88.1%  | 47.0  |
| C60 | 9,246  | 6,723  | 0.1 | 92.3%  | 65.5  |
| C61 | 2,573  | 2,117  | 0.0 | 97.6%  | 66.7  |
| C62 | 2,936  | 1,796  | 0.2 | 98.3%  | 62.0  |

|     |         |         |      |        |       |
|-----|---------|---------|------|--------|-------|
| C64 | 229     | 150     | 0.1  | 95.8%  | 65.4  |
| C65 | 3,619   | 2,356   | 0.0  | 97.2%  | 40.1  |
| C66 | 2,782   | 2,394   | 0.1  | 98.4%  | 36.4  |
| C67 | 39      | 66      | 1.3  | 82.1%  | 38.0  |
| C69 | 915     | 567     | 0.8  | 90.6%  | 24.2  |
| C71 | 3,811   | 1,260   | 0.1  | 98.5%  | 51.3  |
| C72 | 29      | 15      | 0.0  | 96.6%  | 92.6  |
| C73 | 17,893  | 18,361  | 0.0  | 99.6%  | 66.1  |
| C74 | 278     | 242     | 0.7  | 75.9%  | 37.4  |
| C75 | 423,494 | 233,483 | 0.0  | 99.4%  | 81.6  |
| C77 | 150     | 65      | 0.0  | 97.6%  | 55.1  |
| C79 | 106,809 | 98,757  | 0.1  | 97.4%  | 41.1  |
| C80 | 1,208   | 917     | 0.2  | 88.2%  | 60.9  |
| C81 | 857     | 578     | 0.2  | 93.5%  | 26.9  |
| C82 | 8,536   | 6,158   | 0.3  | 96.8%  | 45.9  |
| C83 | 0       | 2       | -    | 0.0%   | 0.0   |
| C84 | 241     | 149     | 0.7  | 66.4%  | 31.6  |
| C85 | 1,811   | 1,099   | 0.1  | 93.5%  | 23.9  |
| C86 | 4,117   | 1,887   | 0.3  | 97.4%  | 67.3  |
| C87 | 1,058   | 1,571   | 0.4  | 97.7%  | 61.5  |
| C88 | 59      | 38      | 0.0  | 100.0% | 4.3   |
| C89 | 2,247   | 1,953   | 0.0  | 99.2%  | 38.2  |
| C90 | 39      | 21      | 0.0  | 97.4%  | 97.9  |
| C91 | 0       | 4       | -    | 0.0%   | 0.0   |
| D01 | 2,088   | 1,178   | 0.3  | 93.3%  | 71.3  |
| D02 | 16,307  | 11,422  | 0.1  | 98.2%  | 53.7  |
| D03 | 1,584   | 528     | 0.4  | 80.9%  | 115.8 |
| D04 | 172     | 83      | 1.4  | 79.8%  | 19.0  |
| D05 | 31      | 12      | 2.3  | 90.6%  | 75.2  |
| D06 | 3,503   | 2,114   | 0.5  | 96.8%  | 39.6  |
| D07 | 3,849   | 1,688   | 1.4  | 93.0%  | 32.9  |
| D08 | 940     | 333     | 1.8  | 81.9%  | 69.4  |
| D10 | 3,076   | 1,419   | 1.2  | 53.8%  | 123.9 |
| D12 | 1,191   | 525     | 0.9  | 64.3%  | 125.6 |
| D13 | 1,930   | 560     | 0.1  | 94.2%  | 95.0  |
| D14 | 8,614   | 3,191   | 0.3  | 78.8%  | 126.2 |
| D15 | 23,216  | 4,385   | 0.3  | 95.3%  | 86.4  |
| D16 | 1,334   | 419     | 0.2  | 78.9%  | 133.6 |
| D17 | 682     | 219     | 0.3  | 72.0%  | 133.7 |
| D19 | 797     | 326     | 0.7  | 81.3%  | 81.2  |
| D20 | 2,986   | 847     | 0.3  | 96.1%  | 69.0  |
| D22 | 399     | 108     | 0.2  | 95.5%  | 114.2 |
| D23 | 184     | 35      | 0.2  | 91.3%  | 61.2  |
| D24 | 1,392   | 823     | 1.0  | 38.3%  | 65.8  |
| D26 | 97      | 26      | 1.3  | 43.3%  | 114.6 |
| D28 | 1,263   | 425     | 0.3  | 96.1%  | 70.9  |
| E01 | 101     | 107     | 4.0  | 13.9%  | 35.5  |
| E02 | 3,180   | 1,086   | 0.5  | 65.3%  | 132.9 |
| E03 | 19,887  | 5,878   | 0.2  | 85.2%  | 98.4  |
| E04 | 4,424   | 1,431   | 0.2  | 88.0%  | 107.3 |
| E05 | 2,338   | 808     | 1.7  | 82.2%  | 71.9  |
| E07 | 2,382   | 546     | 0.3  | 77.8%  | 143.8 |
| E08 | 7,490   | 2,928   | 0.4  | 81.4%  | 86.5  |
| E09 | 27,351  | 19,272  | 0.1  | 97.8%  | 64.4  |
| E10 | 605     | 363     | 0.3  | 95.9%  | 41.1  |
| E11 | 27      | 26      | 0.4  | 77.8%  | 64.1  |
| E12 | 86      | 36      | 0.8  | 80.3%  | 75.7  |
| E13 | 4,944   | 2,072   | 0.5  | 79.1%  | 96.8  |
| E14 | 3,283   | 1,279   | 0.6  | 75.0%  | 107.6 |
| E15 | 363     | 182     | 1.8  | 60.0%  | 92.2  |
| E16 | 158     | 69      | 1.9  | 59.6%  | 89.3  |
| E17 | 759     | 431     | 0.7  | 76.3%  | 86.5  |
| E19 | 361     | 335     | 17.6 | 4.1%   | 20.5  |
| E20 | 6,155   | 1,454   | 0.2  | 87.7%  | 99.9  |
| E21 | 166     | 61      | 2.3  | 6.0%   | 135.9 |
| E23 | 331     | 144     | 5.4  | 23.0%  | 80.3  |
| E24 | 1,076   | 502     | 2.0  | 40.4%  | 73.3  |
| E25 | 7,539   | 4,549   | 1.2  | 84.0%  | 29.1  |
| E27 | 650     | 376     | 2.9  | 71.8%  | 46.4  |
| E28 | 260     | 119     | 2.0  | 33.9%  | 90.1  |
| E29 | 369     | 359     | 21.2 | 7.0%   | 22.9  |

|     |        |        |      |       |       |
|-----|--------|--------|------|-------|-------|
| E30 | 47     | 19     | 3.8  | 42.9% | 55.1  |
| E31 | 141    | 91     | 6.1  | 20.6% | 56.9  |
| E33 | 566    | 251    | 1.1  | 75.1% | 81.0  |
| E34 | 5,286  | 3,020  | 0.8  | 75.3% | 44.9  |
| E35 | 1,893  | 1,157  | 1.7  | 64.7% | 48.6  |
| E38 | 1,005  | 624    | 0.2  | 94.7% | 64.7  |
| E39 | 34     | 36     | 6.6  | 32.1% | 59.9  |
| E40 | 25     | 16     | 7.5  | 8.0%  | 76.5  |
| E41 | 232    | 151    | 3.8  | 42.7% | 50.3  |
| E42 | 1,992  | 1,813  | 19.0 | 26.1% | 44.7  |
| E43 | 158    | 84     | 4.9  | 24.7% | 74.0  |
| E44 | 0      | 2      | -    | 0.0%  | 0.0   |
| E46 | 76     | 58     | 6.2  | 5.3%  | 32.6  |
| E47 | 33     | 26     | 13.8 | 27.4% | 14.1  |
| E48 | 1,270  | 819    | 2.9  | 41.1% | 22.4  |
| E49 | 36,042 | 15,554 | 1.5  | 81.4% | 15.4  |
| E50 | 804    | 607    | 3.1  | 33.7% | 25.4  |
| E51 | 1,200  | 727    | 2.0  | 46.9% | 50.0  |
| E52 | 170    | 92     | 4.2  | 10.6% | 26.7  |
| E53 | 52     | 32     | 37.6 | 1.9%  | 15.5  |
| E54 | 10,201 | 7,986  | 6.5  | 0.1%  | 22.6  |
| E55 | 1,809  | 1,166  | 6.1  | 0.1%  | 33.8  |
| E57 | 51     | 25     | 7.4  | 5.9%  | 25.2  |
| E59 | 12,095 | 9,925  | 1.0  | 76.9% | 12.2  |
| E61 | 463    | 394    | 5.6  | 11.9% | 29.4  |
| E62 | 80     | 57     | 2.6  | 10.0% | 45.8  |
| E63 | 16,673 | 13,000 | 0.6  | 88.8% | 10.6  |
| E64 | 877    | 689    | 0.4  | 80.4% | 96.1  |
| E66 | 366    | 329    | 0.3  | 85.8% | 64.1  |
| E67 | 29     | 2      | 3.4  | 62.1% | 27.9  |
| F01 | 124    | 87     | 1.3  | 83.1% | 46.7  |
| F02 | 9,189  | 5,182  | 0.1  | 97.6% | 56.3  |
| F03 | 663    | 374    | 1.2  | 20.7% | 105.4 |
| F04 | 146    | 83     | 0.9  | 72.1% | 74.3  |
| F05 | 1,438  | 804    | 0.3  | 94.0% | 61.7  |
| F06 | 2,832  | 1,558  | 0.2  | 97.8% | 40.0  |
| F18 | 3,095  | 1,621  | 0.2  | 90.7% | 78.4  |
| F20 | 3,170  | 1,899  | 0.1  | 97.4% | 43.9  |
| F22 | 1,014  | 899    | 8.2  | 10.2% | 27.5  |
| F23 | 4,035  | 2,435  | 0.4  | 84.5% | 40.9  |
| F24 | 6,717  | 3,968  | 0.2  | 94.7% | 25.0  |
| F26 | 4,566  | 2,009  | 1.0  | 71.0% | 68.4  |
| F28 | 1,682  | 907    | 0.6  | 86.7% | 49.6  |
| F29 | 1,178  | 688    | 1.5  | 3.5%  | 127.4 |
| F30 | 240    | 98     | 1.6  | 19.6% | 145.0 |
| F32 | 2,734  | 1,219  | 0.2  | 91.5% | 48.5  |
| F34 | 45,021 | 15,636 | 0.4  | 65.9% | 96.2  |
| F36 | 1,793  | 1,150  | 1.1  | 81.0% | 29.4  |
| F38 | 4,178  | 2,112  | 1.3  | 82.5% | 46.3  |
| F39 | 74     | 44     | 4.7  | 37.9% | 87.3  |
| F40 | 108    | 50     | 0.8  | 85.3% | 72.6  |
| F42 | 8,050  | 3,703  | 0.4  | 97.0% | 35.3  |
| F44 | 4,332  | 2,484  | 1.8  | 12.2% | 81.0  |
| F45 | 1,072  | 547    | 0.8  | 44.5% | 77.3  |
| F46 | 55     | 34     | 3.6  | 65.0% | 83.3  |
| F48 | 1,742  | 1,193  | 1.3  | 92.7% | 44.7  |
| F50 | 14     | 7      | 0.5  | 50.0% | 131.8 |
| F51 | 535    | 196    | 0.2  | 88.1% | 86.9  |
| F52 | 44     | 14     | 0.8  | 65.9% | 127.3 |
| F53 | 77     | 50     | 1.1  | 79.1% | 86.5  |
| F55 | 285    | 86     | 0.1  | 93.7% | 114.2 |
| F56 | 134    | 39     | 0.3  | 92.6% | 80.8  |
| F58 | 171    | 103    | 2.2  | 84.9% | 92.5  |
| G01 | 1,403  | 1,008  | 12.7 | 0.1%  | 31.2  |
| G02 | 87     | 62     | 12.6 | 0.0%  | 22.9  |
| G03 | 212    | 163    | 12.9 | 1.9%  | 25.7  |
| G04 | 27     | 21     | 5.5  | 3.7%  | 72.8  |
| G05 | 18     | 12     | 11.9 | 0.0%  | 57.5  |
| G06 | 25     | 11     | 12.8 | 27.9% | 63.1  |
| G07 | 169    | 137    | 18.8 | 5.9%  | 38.6  |
| G08 | 16     | 16     | 16.3 | 30.8% | 35.4  |



|     |         |         |      |       |       |
|-----|---------|---------|------|-------|-------|
| G09 | 531     | 311     | 2.9  | 5.1%  | 98.5  |
| G10 | 38      | 16      | 1.3  | 84.3% | 37.5  |
| G11 | 14      | 10      | 8.6  | 21.4% | 12.5  |
| G12 | 63      | 59      | 0.5  | 79.4% | 29.3  |
| G13 | 8       | 7       | 4.4  | 12.3% | 21.8  |
| G14 | 426     | 214     | 0.7  | 83.3% | 50.7  |
| G15 | 4,876   | 3,885   | 2.1  | 65.5% | 32.6  |
| G16 | 9,655   | 6,265   | 0.9  | 86.8% | 28.3  |
| G17 | 15      | 7       | 0.9  | 73.3% | 32.5  |
| G18 | 462     | 257     | 1.0  | 61.6% | 55.8  |
| G19 | 512     | 265     | 1.0  | 83.2% | 39.3  |
| G20 | 7       | 23      | 3.7  | 27.8% | 7.5   |
| G21 | 9,211   | 4,318   | 0.8  | 86.4% | 43.9  |
| G23 | 1,975   | 990     | 3.7  | 7.0%  | 123.8 |
| G24 | 2,628   | 960     | 3.0  | 13.1% | 129.3 |
| G25 | 219     | 114     | 3.6  | 12.4% | 115.1 |
| G26 | 1       | 0       | 49.7 | 0.0%  | 0.0   |
| G27 | 349     | 324     | 11.3 | 0.3%  | 24.9  |
| G28 | 3,307   | 1,283   | 3.9  | 0.7%  | 118.9 |
| G29 | 296     | 236     | 4.2  | 4.4%  | 41.9  |
| G30 | 1,384   | 362     | 0.9  | 59.0% | 82.1  |
| G31 | 30      | 23      | 9.6  | 6.7%  | 143.4 |
| G32 | 1,840   | 626     | 2.6  | 3.2%  | 135.4 |
| G33 | 2,363   | 913     | 5.8  | 6.6%  | 101.1 |
| G34 | 7,423   | 5,754   | 6.0  | 47.2% | 42.1  |
| G35 | 8       | 7       | 8.1  | 0.0%  | 79.3  |
| G36 | 90      | 47      | 8.1  | 10.0% | 82.3  |
| G38 | 932     | 592     | 2.8  | 47.7% | 86.8  |
| G40 | 178     | 174     | 3.7  | 4.5%  | 48.1  |
| G41 | 13      | 14      | 8.8  | 46.4% | 24.3  |
| G42 | 1,965   | 1,527   | 0.3  | 80.3% | 40.4  |
| G43 | 18,182  | 11,949  | 2.1  | 69.5% | 37.2  |
| G44 | 26,398  | 18,781  | 4.6  | 59.4% | 32.8  |
| G45 | 685,821 | 415,882 | 0.5  | 91.8% | 28.5  |
| G46 | 402     | 352     | 4.1  | 41.8% | 32.7  |
| G48 | 515     | 231     | 1.3  | 77.0% | 77.4  |
| G49 | 55      | 59      | 15.0 | 10.9% | 31.9  |
| G50 | 39      | 26      | 8.2  | 10.2% | 42.0  |
| G51 | 96      | 80      | 14.3 | 1.0%  | 49.4  |
| G52 | 5       | 9       | 8.7  | 0.0%  | 9.0   |
| G53 | 109     | 94      | 11.2 | 4.6%  | 62.4  |
| G54 | 327     | 270     | 4.8  | 51.6% | 26.8  |
| G55 | 283     | 148     | 0.7  | 73.4% | 25.6  |
| G57 | 37      | 16      | 5.1  | 35.1% | 29.7  |
| G58 | 205     | 215     | 13.0 | 1.9%  | 55.4  |
| G59 | 20      | 22      | 9.5  | 10.2% | 32.5  |
| G60 | 1,045   | 1,059   | 8.9  | 43.3% | 33.0  |
| G61 | 59      | 39      | 10.2 | 3.4%  | 99.9  |
| G62 | 4       | 2       | 0.5  | 75.0% | 72.0  |
| G63 | 68      | 19      | 10.8 | 36.7% | 28.1  |
| G64 | 1,658   | 449     | 5.9  | 38.2% | 18.1  |
| G65 | 199     | 134     | 1.5  | 74.8% | 49.8  |
| G67 | 978     | 2,149   | 6.6  | 56.6% | 31.8  |
| G68 | 1       | 0       | 22.1 | 0.0%  | 0.0   |
| G69 | 1,403   | 1,011   | 13.2 | 1.1%  | 60.3  |
| G70 | 128     | 89      | 7.0  | 10.9% | 60.9  |
| G71 | 64      | 45      | 13.1 | 0.0%  | 51.7  |
| G72 | 146     | 71      | 12.1 | 0.0%  | 130.1 |
| G73 | 353     | 291     | 11.9 | 4.5%  | 72.8  |
| G74 | 1,045   | 748     | 14.3 | 0.1%  | 59.1  |
| G75 | 5,015   | 2,628   | 7.4  | 2.6%  | 90.0  |
| G76 | 48      | 24      | 8.5  | 0.0%  | 64.5  |
| G78 | 138     | 96      | 11.0 | 13.8% | 67.8  |
| G79 | 139     | 94      | 3.2  | 66.9% | 48.6  |
| G80 | 11,448  | 6,940   | 0.5  | 92.8% | 36.1  |
| G82 | 61      | 16      | 4.0  | 35.8% | 46.8  |
| H01 | 827     | 798     | 2.8  | 16.8% | 43.2  |
| H02 | 1,386   | 1,263   | 2.7  | 32.8% | 71.4  |
| H03 | 163     | 104     | 5.0  | 28.9% | 101.4 |
| H04 | 563     | 383     | 10.6 | 0.0%  | 74.0  |
| H05 | 484     | 358     | 11.7 | 0.8%  | 57.5  |

|     |         |         |      |        |       |
|-----|---------|---------|------|--------|-------|
| H06 | 1,406   | 1,344   | 10.2 | 0.1%   | 24.2  |
| H07 | 8,399   | 7,668   | 8.4  | 0.1%   | 28.8  |
| H08 | 175     | 143     | 12.1 | 0.0%   | 35.2  |
| H09 | 1,135   | 938     | 9.4  | 0.1%   | 29.1  |
| H10 | 1,937   | 1,382   | 9.2  | 0.2%   | 49.6  |
| H11 | 552     | 351     | 12.4 | 1.1%   | 54.3  |
| H12 | 99      | 74      | 3.3  | 37.3%  | 48.7  |
| H13 | 36      | 28      | 13.8 | 0.0%   | 27.6  |
| H14 | 151     | 116     | 5.1  | 45.7%  | 79.9  |
| H15 | 4,394   | 2,783   | 8.7  | 2.7%   | 84.2  |
| H16 | 17      | 15      | 8.8  | 17.9%  | 75.9  |
| H17 | 46      | 16      | 5.6  | 28.3%  | 39.1  |
| H18 | 14      | 4       | 2.1  | 79.6%  | 47.8  |
| H19 | 152     | 82      | 9.3  | 51.2%  | 45.8  |
| H20 | 196,045 | 150,592 | 0.1  | 97.7%  | 39.0  |
| H21 | 1,062   | 785     | 1.7  | 76.8%  | 37.7  |
| H22 | 419,132 | 280,442 | 0.1  | 97.6%  | 35.8  |
| H23 | 58,210  | 25,684  | 0.1  | 97.9%  | 25.7  |
| H24 | 1,863   | 1,512   | 3.3  | 65.7%  | 30.8  |
| H25 | 310,417 | 132,825 | 0.4  | 94.5%  | 25.6  |
| H26 | 685     | 279     | 0.6  | 93.7%  | 31.1  |
| H27 | 86      | 62      | 4.1  | 69.7%  | 36.7  |
| H28 | 702     | 346     | 1.6  | 86.7%  | 54.3  |
| H29 | 606     | 553     | 12.4 | 2.1%   | 54.7  |
| H30 | 283     | 87      | 4.6  | 59.1%  | 67.9  |
| H31 | 104     | 57      | 5.4  | 39.5%  | 17.8  |
| H32 | 38      | 16      | 15.5 | 0.0%   | 106.0 |
| H33 | 11,502  | 9,781   | 9.5  | 0.2%   | 37.3  |
| H34 | 548     | 299     | 1.7  | 29.2%  | 110.3 |
| H35 | 899     | 342     | 2.5  | 16.7%  | 153.4 |
| H36 | 485     | 190     | 3.7  | 5.8%   | 106.6 |
| H37 | 15      | 6       | 0.0  | 100.0% | 33.3  |
| H40 | 190     | 129     | 1.5  | 60.2%  | 51.8  |
| H41 | 4,194   | 2,684   | 1.9  | 53.7%  | 56.0  |
| H42 | 1,166   | 524     | 1.7  | 52.3%  | 105.4 |
| H44 | 3,600   | 1,989   | 2.0  | 82.1%  | 66.4  |
| H46 | 2,868   | 1,403   | 0.9  | 93.0%  | 62.6  |
| H47 | 16      | 8       | 4.7  | 50.0%  | 85.3  |
| H48 | 8,718   | 3,732   | 0.1  | 94.0%  | 75.1  |
| H49 | 557     | 376     | 0.3  | 90.8%  | 77.9  |
| H50 | 288     | 239     | 3.9  | 12.8%  | 96.3  |
| H51 | 8,256   | 3,243   | 0.3  | 86.7%  | 91.1  |
| H52 | 20,018  | 8,963   | 0.1  | 97.5%  | 55.6  |
| H53 | 361     | 134     | 0.8  | 83.2%  | 91.0  |
| H54 | 800     | 464     | 0.9  | 85.6%  | 59.2  |
| H55 | 13,277  | 7,603   | 0.4  | 90.6%  | 79.4  |
| H56 | 10,140  | 4,948   | 0.2  | 94.2%  | 69.1  |
| H57 | 113     | 32      | 0.5  | 89.4%  | 130.6 |
| H58 | 2,508   | 1,850   | 1.5  | 72.6%  | 31.3  |
| H59 | 5,556   | 2,171   | 0.4  | 85.1%  | 86.5  |
| H60 | 2,820   | 1,807   | 0.6  | 85.3%  | 57.0  |
| H62 | 1,202   | 618     | 1.9  | 79.5%  | 48.8  |
| H66 | 354     | 162     | 2.9  | 72.6%  | 105.2 |
| H68 | 323     | 205     | 0.6  | 96.4%  | 64.5  |
| H69 | 1,274   | 684     | 0.3  | 96.5%  | 62.8  |
| H70 | 48      | 19      | 1.2  | 79.7%  | 59.5  |
| H71 | 0       | 48      |      | 0.0%   | 0.0   |
| J01 | 385     | 227     | 13.2 | 0.3%   | 95.7  |
| J02 | 2,533   | 2,221   | 6.9  | 0.8%   | 32.3  |
| J03 | 425     | 288     | 5.7  | 2.8%   | 38.9  |
| J04 | 11      | 4       | 5.8  | 27.0%  | 52.8  |
| J05 | 86      | 67      | 6.6  | 10.5%  | 28.4  |
| J06 | 20      | 19      | 5.7  | 5.0%   | 19.6  |
| J07 | 9       | 15      | 11.6 | 0.0%   | 34.2  |
| J08 | 79      | 50      | 3.3  | 8.9%   | 43.6  |
| J09 | 279     | 210     | 1.9  | 58.2%  | 27.3  |
| J10 | 1,887   | 1,659   | 2.3  | 4.6%   | 21.1  |
| J11 | 469     | 378     | 4.6  | 26.0%  | 24.6  |
| J12 | 1,507   | 1,547   | 7.0  | 11.5%  | 23.0  |
| J13 | 13,173  | 10,155  | 2.2  | 70.8%  | 20.8  |
| J14 | 1,022   | 700     | 3.0  | 58.6%  | 20.5  |

|     |        |        |      |       |       |
|-----|--------|--------|------|-------|-------|
| J15 | 12     | 23     | 7.5  | 0.0%  | 39.5  |
| J16 | 11     | 2      | 4.5  | 53.8% | 82.8  |
| J17 | 284    | 253    | 1.0  | 81.4% | 18.8  |
| J18 | 65,581 | 37,868 | 1.5  | 57.6% | 90.6  |
| J19 | 8      | 5      | 4.1  | 51.9% | 111.2 |
| J20 | 22     | 23     | 4.5  | 18.3% | 64.5  |
| J21 | 161    | 166    | 9.8  | 15.6% | 146.5 |
| J23 | 34     | 24     | 3.0  | 56.4% | 64.8  |
| J24 | 77     | 128    | 10.8 | 24.7% | 19.8  |
| J25 | 35     | 41     | 2.3  | 69.4% | 16.1  |
| J26 | 21     | 21     | 4.3  | 51.9% | 70.0  |
| J27 | 80     | 40     | 7.6  | 1.3%  | 37.8  |
| J28 | 29     | 16     | 5.1  | 13.9% | 41.4  |
| J29 | 187    | 135    | 12.0 | 0.0%  | 43.6  |
| J30 | 53     | 19     | 7.8  | 11.3% | 47.4  |
| J31 | 32     | 42     | 4.1  | 59.8% | 41.1  |
| J32 | 17     | 3      | 7.6  | 17.5% | 87.0  |
| J33 | 84     | 68     | 8.5  | 8.3%  | 48.4  |
| J34 | 157    | 46     | 2.0  | 60.0% | 44.4  |
| J35 | 60     | 53     | 3.1  | 40.1% | 27.5  |
| J36 | 117    | 121    | 1.2  | 74.6% | 35.1  |
| J37 | 85     | 33     | 3.7  | 61.4% | 43.3  |
| J38 | 18,379 | 14,319 | 3.6  | 51.2% | 24.5  |
| J39 | 298    | 1,140  | 2.5  | 52.3% | 43.5  |
| J40 | 6,007  | 4,263  | 3.6  | 50.0% | 28.0  |
| J41 | 4,027  | 2,774  | 1.9  | 60.5% | 42.9  |
| J42 | 847    | 647    | 2.8  | 46.5% | 26.4  |
| J43 | 2,385  | 1,674  | 3.3  | 52.5% | 25.2  |
| J44 | 498    | 308    | 2.5  | 55.1% | 31.4  |
| J45 | 131    | 123    | 2.9  | 61.2% | 21.8  |
| J46 | 62     | 58     | 6.0  | 6.4%  | 16.5  |
| J47 | 731    | 578    | 10.0 | 6.3%  | 15.2  |
| J48 | 903    | 735    | 9.5  | 13.2% | 16.5  |
| J49 | 10     | 7      | 6.3  | 20.7% | 125.3 |
| J50 | 447    | 416    | 6.8  | 13.4% | 13.7  |
| J51 | 13     | 9      | 0.5  | 61.5% | 106.0 |
| J52 | 15     | 6      | 6.7  | 48.0% | 28.4  |
| J53 | 2,759  | 1,647  | 0.4  | 91.3% | 30.8  |
| J54 | 10     | 0      | 7.2  | 0.0%  | 0.0   |
| J55 | 119    | 81     | 15.8 | 0.0%  | 33.5  |
| J56 | 1,199  | 1,077  | 12.7 | 0.1%  | 25.9  |
| J57 | 611    | 572    | 15.8 | 2.1%  | 31.6  |
| J58 | 38     | 12     | 7.3  | 15.9% | 34.2  |
| J59 | 29     | 7      | 7.9  | 3.5%  | 73.0  |
| J60 | 94     | 87     | 2.4  | 77.6% | 37.9  |
| J61 | 414    | 438    | 8.0  | 37.5% | 19.1  |
| J62 | 0      | 0      | -    | 0.0%  | 0.0   |
| J63 | 3      | 0      | 10.3 | 66.7% | 23.5  |
| J65 | 36     | 85     | 7.1  | 41.5% | 24.0  |
| J66 | 286    | 166    | 11.2 | 43.3% | 21.7  |
| J67 | 193    | 147    | 2.4  | 69.3% | 14.0  |
| J68 | 29     | 49     | 0.5  | 73.2% | 51.1  |
| J69 | 310    | 180    | 7.2  | 0.3%  | 52.3  |
| J70 | 53     | 19     | 2.9  | 11.4% | 64.2  |
| J72 | 242    | 225    | 5.4  | 36.8% | 21.1  |
| J73 | 51     | 44     | 0.2  | 90.2% | 28.4  |
| J74 | 9,951  | 7,069  | 0.4  | 92.2% | 21.9  |
| J77 | 0      | 0      | 1.0  | 0.0%  | 0.0   |
| K01 | 3      | 2      | 28.2 | 0.0%  | 0.0   |
| K02 | 72     | 73     | 60.3 | 4.2%  | 51.8  |
| K04 | 214    | 206    | 5.7  | 0.0%  | 60.8  |
| K05 | 2      | 4      | 20.5 | 0.0%  | 34.0  |
| K06 | 138    | 124    | 8.8  | 0.0%  | 98.8  |
| K07 | 36     | 23     | 8.7  | 0.0%  | 34.9  |
| K08 | 25     | 20     | 11.1 | 0.0%  | 79.0  |
| K09 | 211    | 163    | 8.6  | 0.9%  | 82.3  |
| K10 | 379    | 219    | 5.8  | 0.8%  | 81.9  |
| K11 | 431    | 351    | 6.3  | 0.5%  | 47.8  |
| K12 | 4      | 3      | 5.6  | 28.6% | 126.0 |
| K13 | 653    | 427    | 1.5  | 9.5%  | 89.2  |
| K14 | 26     | 15     | 7.8  | 3.9%  | 75.3  |

|     |         |        |      |       |       |
|-----|---------|--------|------|-------|-------|
| K15 | 3       | 2      | 5.8  | 40.0% | 24.0  |
| K16 | 426     | 909    | 2.4  | 34.7% | 55.3  |
| K17 | 200     | 158    | 14.4 | 0.0%  | 93.5  |
| K18 | 122     | 118    | 6.4  | 2.5%  | 93.0  |
| K19 | 79      | 29     | 9.3  | 1.3%  | 77.7  |
| K20 | 72      | 39     | 4.2  | 4.2%  | 72.5  |
| K22 | 160     | 124    | 7.6  | 8.1%  | 44.2  |
| K23 | 53      | 199    | 9.0  | 28.3% | 30.5  |
| K24 | 210     | 167    | 7.7  | 2.4%  | 88.2  |
| K25 | 3,243   | 2,070  | 11.8 | 0.5%  | 86.0  |
| K26 | 8,936   | 7,677  | 7.8  | 0.1%  | 61.2  |
| K27 | 161     | 86     | 12.6 | 0.6%  | 97.4  |
| K28 | 176     | 110    | 5.7  | 1.7%  | 104.8 |
| K29 | 14      | 14     | 15.0 | 14.4% | 41.4  |
| K30 | 373     | 278    | 12.1 | 0.8%  | 100.6 |
| K31 | 23      | 23     | 5.1  | 4.3%  | 79.4  |
| K32 | 0       | 3      | -    | 0.0%  | 0.0   |
| K33 | 397     | 302    | 10.4 | 0.0%  | 105.6 |
| K34 | 93      | 55     | 11.5 | 1.1%  | 80.2  |
| K35 | 894     | 561    | 5.3  | 13.9% | 62.6  |
| K36 | 1       | 2      | 4.5  | 0.0%  | 95.0  |
| K37 | 127     | 91     | 4.1  | 0.0%  | 84.2  |
| K38 | 6       | 9      | 4.1  | 0.0%  | 77.3  |
| K40 | 1,695   | 940    | 11.7 | 0.2%  | 76.9  |
| K41 | 15      | 16     | 7.3  | 0.0%  | 56.6  |
| K42 | 3       | 1      | 2.4  | 80.0% | 176.0 |
| K43 | 0       | 3      | -    | 0.0%  | 0.0   |
| K44 | 28      | 32     | 7.6  | 10.5% | 54.6  |
| K45 | 13,829  | 8,141  | 9.2  | 0.0%  | 67.5  |
| K46 | 1       | 3      | 9.0  | 0.0%  | 0.0   |
| K47 | 15      | 12     | 8.7  | 13.2% | 85.0  |
| K48 | 34      | 24     | 8.7  | 5.9%  | 67.1  |
| K49 | 2,606   | 2,109  | 2.5  | 44.7% | 61.3  |
| K50 | 119     | 77     | 3.0  | 30.1% | 55.1  |
| K51 | 543     | 367    | 0.9  | 77.0% | 54.1  |
| K52 | 120     | 52     | 3.9  | 9.2%  | 60.7  |
| K53 | 9       | 4      | 4.7  | 31.8% | 109.8 |
| K54 | 99      | 59     | 45.8 | 0.0%  | 4.8   |
| K55 | 29      | 36     | 8.4  | 6.8%  | 35.5  |
| K56 | 146     | 92     | 5.5  | 10.3% | 46.3  |
| K57 | 11,290  | 7,204  | 0.9  | 51.7% | 101.7 |
| K58 | 2,638   | 1,686  | 0.9  | 75.4% | 95.6  |
| K59 | 10,578  | 8,645  | 2.5  | 52.8% | 60.9  |
| K60 | 33,064  | 28,817 | 2.4  | 51.8% | 49.3  |
| K61 | 1,739   | 1,666  | 3.7  | 40.5% | 45.2  |
| K62 | 10,003  | 7,507  | 0.8  | 42.6% | 119.7 |
| K63 | 113,544 | 69,061 | 1.5  | 71.8% | 46.0  |
| K64 | 29      | 19     | 1.3  | 55.4% | 97.0  |
| K65 | 2,735   | 1,862  | 2.6  | 52.5% | 45.0  |
| K66 | 5       | 7      | 2.3  | 80.0% | 47.5  |
| K67 | 110     | 73     | 9.9  | 0.9%  | 54.5  |
| K68 | 270     | 213    | 5.9  | 5.5%  | 27.4  |
| K69 | 113     | 73     | 8.2  | 0.9%  | 31.2  |
| K71 | 29      | 23     | 5.1  | 14.0% | 17.5  |
| K73 | 2,600   | 2,437  | 0.5  | 83.5% | 57.4  |
| K74 | 352     | 537    | 0.7  | 77.9% | 43.2  |
| K75 | 36,418  | 27,012 | 2.2  | 48.9% | 52.8  |
| K76 | 87      | 74     | 6.0  | 12.7% | 74.2  |
| K77 | 126     | 114    | 5.7  | 12.7% | 43.5  |
| K78 | 8       | 3      | 1.6  | 12.7% | 71.0  |
| L01 | 32      | 26     | 12.6 | 9.4%  | 33.6  |
| L02 | 175     | 117    | 10.5 | 16.0% | 38.2  |
| L03 | 504     | 390    | 2.1  | 25.0% | 77.0  |
| L04 | 191     | 111    | 14.3 | 0.0%  | 1.0   |
| L05 | 10      | 7      | 18.2 | 20.0% | 44.8  |
| L06 | 20      | 8      | 8.9  | 0.0%  | 69.1  |
| L07 | 32      | 16     | 10.6 | 0.0%  | 69.3  |
| L08 | 16      | 15     | 13.1 | 6.3%  | 44.0  |
| L09 | 141     | 125    | 9.1  | 0.0%  | 45.9  |
| L10 | 43      | 29     | 6.4  | 0.0%  | 53.5  |
| L12 | 104     | 69     | 10.6 | 0.0%  | 45.2  |

|     |        |        |      |       |       |
|-----|--------|--------|------|-------|-------|
| L13 | 583    | 470    | 3.0  | 18.0% | 84.4  |
| L16 | 106    | 80     | 12.8 | 0.0%  | 44.3  |
| L18 | 80     | 82     | 10.9 | 2.5%  | 45.0  |
| L19 | 2,357  | 1,545  | 10.2 | 0.1%  | 58.9  |
| L20 | 42     | 55     | 14.0 | 0.0%  | 22.7  |
| L21 | 198    | 111    | 11.7 | 0.5%  | 63.4  |
| L22 | 46     | 36     | 15.1 | 4.4%  | 45.1  |
| L23 | 393    | 295    | 7.1  | 0.0%  | 53.1  |
| L25 | 84     | 45     | 6.2  | 2.4%  | 54.0  |
| L26 | 793    | 496    | 2.7  | 45.5% | 65.1  |
| L27 | 3,041  | 1,765  | 4.6  | 0.5%  | 51.2  |
| L28 | 84     | 62     | 5.0  | 6.0%  | 41.6  |
| L29 | 3,136  | 2,129  | 3.1  | 0.2%  | 14.8  |
| L30 | 103    | 52     | 4.4  | 10.7% | 58.2  |
| L31 | 456    | 415    | 3.2  | 41.9% | 37.3  |
| L33 | 348    | 268    | 13.1 | 1.4%  | 72.6  |
| L34 | 16     | 15     | 4.1  | 6.4%  | 55.8  |
| L35 | 3,405  | 2,410  | 2.3  | 65.9% | 39.8  |
| L37 | 57     | 38     | 6.1  | 0.0%  | 47.5  |
| L38 | 91     | 75     | 4.9  | 25.3% | 36.1  |
| L39 | 318    | 252    | 3.2  | 46.2% | 45.0  |
| L41 | 4      | 3      | 8.0  | 0.0%  | 54.0  |
| L42 | 8      | 4      | 4.6  | 12.4% | 47.3  |
| L43 | 824    | 563    | 4.1  | 31.3% | 37.9  |
| L45 | 16     | 26     | 8.6  | 0.0%  | 54.9  |
| L46 | 14     | 9      | 7.9  | 22.0% | 41.6  |
| L47 | 458    | 338    | 5.5  | 24.5% | 35.4  |
| L48 | 1      | 3      | 9.4  | 0.0%  | 0.0   |
| L49 | 56     | 26     | 8.3  | 3.6%  | 39.7  |
| L50 | 8      | 6      | 14.9 | 0.0%  | 55.6  |
| L51 | 456    | 221    | 8.6  | 0.0%  | 54.9  |
| L52 | 90     | 36     | 5.7  | 0.0%  | 36.9  |
| L53 | 48     | 39     | 8.0  | 8.3%  | 71.6  |
| L54 | 4,130  | 2,717  | 2.3  | 58.3% | 55.1  |
| L56 | 6      | 1      | 13.2 | 0.0%  | 24.0  |
| L57 | 246    | 154    | 6.6  | 2.8%  | 49.4  |
| L58 | 49     | 62     | 15.1 | 2.0%  | 28.5  |
| L59 | 2,180  | 1,405  | 9.8  | 0.8%  | 39.1  |
| L60 | 2,147  | 1,297  | 6.5  | 0.4%  | 52.5  |
| L62 | 282    | 181    | 8.4  | 4.6%  | 41.1  |
| L63 | 10,703 | 7,213  | 3.6  | 53.4% | 41.2  |
| L65 | 22     | 10     | 11.9 | 8.9%  | 31.4  |
| L66 | 1,427  | 781    | 4.3  | 49.9% | 39.2  |
| L67 | 4,019  | 2,157  | 0.7  | 93.0% | 9.6   |
| L68 | 139    | 118    | 3.1  | 52.4% | 20.6  |
| L69 | 75     | 78     | 5.5  | 16.0% | 60.9  |
| L70 | 3,700  | 1,391  | 1.2  | 81.8% | 98.6  |
| L71 | 3,877  | 2,230  | 4.1  | 21.9% | 57.8  |
| L72 | 470    | 304    | 4.0  | 48.6% | 40.9  |
| L73 | 8      | 1      | 1.0  | 37.5% | 55.3  |
| L74 | 14,277 | 11,067 | 1.3  | 72.4% | 38.6  |
| L75 | 1,691  | 827    | 2.4  | 64.5% | 77.8  |
| L76 | 4      | 0      | 7.0  | 0.0%  | 68.0  |
| L77 | 4      | 13     | 20.5 | 0.0%  | 129.0 |
| L79 | 1,801  | 1,198  | 4.8  | 53.5% | 40.1  |
| L80 | 31     | 27     | 5.8  | 16.4% | 75.9  |
| L81 | 16     | 6      | 7.8  | 12.4% | 82.3  |
| L82 | 9      | 8      | 2.6  | 33.8% | 83.3  |
| L83 | 48     | 10     | 2.1  | 83.3% | 98.9  |
| L84 | 3,077  | 586    | 0.1  | 90.3% | 97.7  |
| L85 | 254    | 90     | 0.3  | 86.3% | 100.2 |
| L86 | 6,123  | 1,886  | 0.1  | 99.1% | 94.3  |
| L87 | 4,471  | 1,264  | 0.1  | 95.7% | 91.4  |
| L88 | 14,886 | 4,600  | 0.1  | 97.9% | 100.0 |
| L90 | 25     | 17     | 6.9  | 32.0% | 33.1  |
| L93 | 379    | 209    | 2.5  | 71.8% | 57.2  |
| L94 | 10,297 | 10,576 | 1.6  | 81.0% | 26.4  |
| L95 | 1,549  | 766    | 1.5  | 79.0% | 53.2  |
| L96 | 49     | 38     | 5.2  | 22.3% | 8.3   |
| L97 | 471    | 209    | 4.7  | 46.1% | 70.2  |
| L98 | 21     | 14     | 2.0  | 60.5% | 100.8 |

|     |        |        |     |       |       |
|-----|--------|--------|-----|-------|-------|
| L99 | 24,285 | 21,446 | 7.6 | 50.5% | 14.4  |
| M01 | 1,064  | 516    | 8.6 | 0.0%  | 36.9  |
| M02 | 7,013  | 5,235  | 4.4 | 0.3%  | 40.8  |
| M03 | 1,803  | 1,527  | 3.4 | 0.4%  | 42.1  |
| M04 | 157    | 81     | 1.9 | 21.7% | 96.9  |
| M05 | 625    | 467    | 2.7 | 2.1%  | 71.1  |
| M06 | 358    | 333    | 6.9 | 20.4% | 42.7  |
| M07 | 0      | 3,265  | -   | 0.0%  | 0.0   |
| M08 | 57     | 43     | 4.6 | 35.0% | 48.0  |
| M09 | 8,956  | 4,238  | 1.0 | 52.1% | 81.6  |
| M10 | 1,045  | 606    | 1.9 | 19.5% | 83.2  |
| M11 | 913    | 640    | 0.8 | 64.6% | 63.6  |
| M12 | 6      | 0      | 4.0 | 83.3% | 20.5  |
| M13 | 13,869 | 11,130 | 4.3 | 49.6% | 21.4  |
| M14 | 16,278 | 9,222  | 0.0 | 98.8% | 46.7  |
| M15 | 387    | 271    | 3.7 | 49.7% | 22.1  |
| M16 | 6,758  | 6,210  | 2.5 | 54.4% | 63.0  |
| M17 | 108    | 28     | 0.2 | 98.7% | 23.2  |
| M18 | 139    | 99     | 7.4 | 2.9%  | 45.8  |
| M19 | 480    | 299    | 7.8 | 21.0% | 98.1  |
| M20 | 231    | 191    | 5.4 | 2.2%  | 94.0  |
| M21 | 74     | 53     | 6.6 | 2.7%  | 74.7  |
| M22 | 6      | 5      | 0.9 | 31.3% | 83.3  |
| M23 | 23     | 15     | 1.8 | 39.1% | 49.9  |
| M24 | 0      | 22     | -   | 0.0%  | 0.0   |
| M25 | 244    | 230    | 2.6 | 30.0% | 95.9  |
| M26 | 317    | 271    | 2.7 | 41.6% | 51.9  |
| M27 | 16,199 | 13,763 | 1.2 | 58.5% | 62.8  |
| M28 | 1,222  | 11     | 1.3 | 54.4% | 58.7  |
| M29 | 23,155 | 16,862 | 1.7 | 68.2% | 53.5  |
| M30 | 1,479  | 1,064  | 0.8 | 67.0% | 62.5  |
| M31 | 2,851  | 3,970  | 0.2 | 95.6% | 20.7  |
| M32 | 684    | 522    | 0.5 | 75.8% | 80.7  |
| M33 | 1,769  | 1,840  | 4.8 | 40.3% | 33.8  |
| M34 | 1,871  | 1,535  | 9.3 | 1.4%  | 39.3  |
| M35 | 142    | 118    | 5.5 | 4.2%  | 72.2  |
| M36 | 78     | 33     | 9.2 | 0.0%  | 123.0 |
| M37 | 115    | 72     | 8.6 | 3.5%  | 88.5  |
| M38 | 3,133  | 1,643  | 3.1 | 44.9% | 88.2  |
| M39 | 184    | 86     | 5.6 | 2.7%  | 106.1 |
| M41 | 62     | 54     | 2.9 | 25.9% | 102.1 |
| M42 | 36,776 | 30,973 | 1.5 | 37.3% | 36.3  |
| M43 | 11,846 | 5,331  | 0.2 | 91.6% | 111.0 |
| M44 | 5,229  | 3,139  | 1.9 | 36.6% | 94.8  |
| M45 | 94,771 | 59,570 | 0.4 | 91.8% | 45.5  |
| M48 | 296    | 165    | 2.0 | 71.4% | 71.2  |
| M49 | 58,213 | 31,974 | 0.4 | 96.6% | 53.6  |
| M51 | 81     | 21     | 4.5 | 4.9%  | 129.0 |
| M52 | 854    | 490    | 2.5 | 2.5%  | 121.7 |
| M53 | 1,188  | 191    | 1.0 | 51.8% | 111.0 |
| M54 | 30     | 10     | 6.0 | 23.4% | 108.8 |
| M55 | 47     | 13     | 3.3 | 21.3% | 107.5 |
| M56 | 3,006  | 1,392  | 0.1 | 90.9% | 105.4 |
| M57 | 70     | 32     | 1.2 | 51.4% | 95.9  |
| M58 | 144    | 51     | 0.1 | 89.6% | 82.1  |
| M60 | 70     | 30     | 3.2 | 12.9% | 88.9  |
| M61 | 9,778  | 6,226  | 1.7 | 2.0%  | 41.4  |
| M62 | 34     | 24     | 3.6 | 53.2% | 62.3  |
| M64 | 541    | 161    | 1.8 | 12.0% | 113.8 |
| M65 | 21,043 | 11,074 | 2.0 | 8.5%  | 106.1 |
| M66 | 1,396  | 699    | 1.1 | 30.0% | 101.9 |
| M67 | 531    | 340    | 1.6 | 59.0% | 75.8  |
| M68 | 1,317  | 546    | 0.2 | 84.7% | 93.3  |
| M70 | 42,833 | 27,558 | 0.1 | 93.5% | 31.0  |
| M71 | 589    | 425    | 0.9 | 46.5% | 38.3  |
| M72 | 475    | 253    | 1.3 | 30.1% | 104.8 |
| M73 | 3,086  | 1,181  | 0.7 | 56.4% | 146.3 |
| M75 | 90     | 46     | 1.2 | 53.2% | 72.9  |
| M76 | 12,132 | 6,765  | 0.5 | 77.2% | 76.2  |
| M77 | 1,620  | 1,038  | 0.4 | 92.6% | 40.8  |
| M79 | 6,764  | 2,773  | 0.3 | 86.9% | 69.9  |

|     |        |        |      |        |       |
|-----|--------|--------|------|--------|-------|
| M81 | 2,950  | 1,603  | 0.4  | 87.2%  | 72.8  |
| M83 | 95     | 82     | 0.4  | 89.3%  | 19.2  |
| M85 | 185    | 80     | 1.4  | 73.1%  | 94.7  |
| M86 | 154    | 83     | 1.2  | 65.8%  | 71.4  |
| N01 | 1,378  | 624    | 1.0  | 91.1%  | 82.2  |
| N03 | 567    | 302    | 2.1  | 69.6%  | 75.1  |
| N05 | 93     | 46     | 0.8  | 63.2%  | 54.6  |
| N06 | 3,629  | 2,774  | 0.8  | 76.9%  | 38.0  |
| N07 | 245    | 142    | 0.6  | 87.3%  | 92.7  |
| N08 | 943    | 585    | 0.4  | 85.2%  | 112.7 |
| N09 | 5,500  | 2,654  | 0.2  | 92.7%  | 107.0 |
| N10 | 241    | 71     | 0.2  | 86.4%  | 117.0 |
| N11 | 5,844  | 2,764  | 0.2  | 88.2%  | 98.4  |
| N13 | 521    | 325    | 0.7  | 84.1%  | 77.6  |
| N15 | 2,823  | 1,142  | 0.2  | 93.5%  | 99.8  |
| N17 | 8,775  | 2,499  | 0.0  | 99.3%  | 87.6  |
| N18 | 26     | 17     | 0.5  | 84.6%  | 95.0  |
| N19 | 1,674  | 918    | 0.1  | 96.4%  | 70.8  |
| N20 | 235    | 82     | 0.3  | 89.5%  | 78.5  |
| N22 | 43     | 9      | 0.6  | 74.4%  | 67.0  |
| N24 | 432    | 183    | 3.8  | 64.4%  | 71.3  |
| N26 | 465    | 377    | 4.4  | 10.3%  | 21.1  |
| N27 | 1,453  | 734    | 0.5  | 86.9%  | 63.0  |
| N28 | 3,277  | 1,078  | 0.5  | 81.5%  | 107.9 |
| N29 | 501    | 148    | 2.1  | 4.4%   | 100.2 |
| N30 | 28,358 | 12,766 | 0.2  | 94.6%  | 90.6  |
| N32 | 1,944  | 1,095  | 0.6  | 90.8%  | 55.0  |
| N34 | 569    | 220    | 0.0  | 96.7%  | 85.3  |
| O01 | 838    | 623    | 9.9  | 4.5%   | 48.2  |
| O02 | 294    | 168    | 10.5 | 2.4%   | 61.6  |
| O03 | 368    | 303    | 6.2  | 0.8%   | 56.5  |
| O04 | 348    | 320    | 6.4  | 8.0%   | 55.3  |
| O05 | 245    | 199    | 7.5  | 1.2%   | 40.0  |
| O06 | 143    | 33     | 4.1  | 2.1%   | 118.9 |
| O07 | 832    | 309    | 2.1  | 0.5%   | 127.6 |
| O08 | 48     | 11     | 2.9  | 2.1%   | 102.0 |
| O09 | 26     | 31     | 2.6  | 53.8%  | 111.8 |
| O10 | 59     | 15     | 0.7  | 67.8%  | 98.7  |
| O15 | 1,011  | 702    | 14.6 | 6.5%   | 0.0   |
| O17 | 1,381  | 962    | 2.3  | 71.6%  | 10.0  |
| O18 | 173    | 71     | 6.2  | 1.2%   | 117.0 |
| O19 | 465    | 167    | 0.2  | 89.0%  | 85.7  |
| O20 | 1      | 1      | 0.0  | 100.0% | 113.0 |
| O21 | 480    | 200    | 4.4  | 1.5%   | 123.6 |
| O22 | 22     | 8      | 2.4  | 0.0%   | 89.9  |
| O23 | 80     | 57     | 6.4  | 10.0%  | 87.1  |
| O24 | 46     | 20     | 2.6  | 28.5%  | 49.3  |
| O25 | 229    | 217    | 2.0  | 37.9%  | 64.5  |
| O26 | 134    | 131    | 2.1  | 44.1%  | 51.0  |
| O27 | 4,560  | 2,117  | 0.5  | 69.9%  | 99.8  |
| O29 | 19,760 | 5,750  | 0.2  | 81.6%  | 95.9  |
| O32 | 961    | 340    | 2.9  | 2.9%   | 128.8 |
| O35 | 0      | 30     | -    | 0.0%   | 0.0   |
| O37 | 0      | 36     | -    | 0.0%   | 0.0   |
| O38 | 0      | 84     | -    | 0.0%   | 0.0   |
| O39 | 0      | 54     | -    | 0.0%   | 0.0   |
| O40 | 0      | 111    | -    | 0.0%   | 0.0   |
| P01 | 93     | 49     | 0.5  | 74.4%  | 61.8  |
| P03 | 1,866  | 878    | 0.5  | 87.3%  | 59.5  |
| P05 | 5,064  | 2,950  | 1.1  | 74.4%  | 47.4  |
| P06 | 1,561  | 800    | 0.2  | 92.3%  | 56.1  |
| P07 | 241    | 98     | 0.3  | 88.5%  | 83.2  |
| P09 | 4,206  | 1,812  | 0.6  | 90.7%  | 42.6  |
| P11 | 463    | 168    | 1.2  | 84.3%  | 73.8  |
| P13 | 1,896  | 644    | 1.0  | 82.0%  | 83.9  |
| P14 | 28     | 15     | 0.4  | 82.1%  | 90.5  |
| P15 | 461    | 228    | 0.2  | 94.1%  | 74.9  |
| P17 | 129    | 77     | 1.7  | 58.1%  | 68.0  |
| P18 | 383    | 156    | 1.9  | 11.0%  | 108.2 |
| P19 | 208    | 95     | 0.3  | 76.5%  | 71.3  |
| P20 | 2,414  | 1,433  | 0.4  | 85.6%  | 64.1  |

|     |         |         |      |        |       |
|-----|---------|---------|------|--------|-------|
| P21 | 61      | 29      | 3.4  | 47.7%  | 89.3  |
| P22 | 257     | 76      | 1.5  | 7.8%   | 131.6 |
| P23 | 18,069  | 6,023   | 1.5  | 8.8%   | 115.8 |
| P24 | 1,216   | 337     | 1.8  | 4.7%   | 130.5 |
| P25 | 415     | 135     | 2.0  | 24.3%  | 110.7 |
| P26 | 669     | 492     | 2.0  | 73.2%  | 60.8  |
| P27 | 518     | 279     | 0.7  | 88.5%  | 46.3  |
| P28 | 69      | 27      | 0.9  | 52.2%  | 91.0  |
| P29 | 1,547   | 780     | 0.7  | 79.3%  | 47.9  |
| P30 | 29      | 36      | 3.0  | 37.9%  | 80.6  |
| P31 | 1,234   | 685     | 0.5  | 78.3%  | 93.8  |
| P32 | 26      | 9       | 1.1  | 50.0%  | 118.4 |
| Q01 | 10,670  | 6,692   | 0.1  | 94.8%  | 37.5  |
| Q02 | 2,232   | 650     | 0.1  | 96.5%  | 62.0  |
| Q03 | 2,764   | 1,221   | 0.5  | 93.6%  | 31.7  |
| Q05 | 873     | 531     | 0.5  | 83.9%  | 53.5  |
| Q07 | 28,748  | 19,517  | 2.8  | 2.0%   | 75.3  |
| Q08 | 5,305   | 2,889   | 1.7  | 3.0%   | 91.1  |
| Q09 | 2,965   | 1,464   | 2.5  | 9.6%   | 110.5 |
| Q10 | 1,884   | 1,141   | 0.3  | 90.9%  | 34.1  |
| Q16 | 8,981   | 3,698   | 0.1  | 92.9%  | 75.5  |
| Q17 | 30,458  | 17,991  | 0.2  | 90.8%  | 50.9  |
| Q18 | 39,233  | 21,084  | 0.1  | 94.1%  | 44.9  |
| Q19 | 3       | 0       | 0.0  | 100.0% | 112.7 |
| Q20 | 1,550   | 777     | 1.0  | 86.2%  | 59.9  |
| Q22 | 8,106   | 5,482   | 1.3  | 45.1%  | 76.1  |
| Q23 | 6,107   | 3,710   | 1.6  | 37.7%  | 76.4  |
| Q24 | 251     | 188     | 1.4  | 52.9%  | 75.1  |
| Q25 | 272     | 163     | 1.1  | 66.1%  | 79.1  |
| Q26 | 2       | 2       | 0.0  | 100.0% | 60.5  |
| Q27 | 252     | 88      | 0.2  | 82.5%  | 92.8  |
| Q28 | 73      | 27      | 0.3  | 84.9%  | 69.4  |
| Q29 | 9       | 5       | 0.9  | 33.3%  | 45.7  |
| Q30 | 115     | 40      | 0.8  | 78.5%  | 98.2  |
| Q31 | 140     | 77      | 2.2  | 51.5%  | 89.8  |
| Q32 | 191     | 86      | 0.6  | 75.9%  | 80.4  |
| Q34 | 12      | 10      | 2.9  | 66.7%  | 104.2 |
| Q35 | 6,006   | 1,757   | 0.1  | 88.0%  | 88.0  |
| Q36 | 157     | 41      | 0.1  | 89.8%  | 94.9  |
| Q37 | 37      | 15      | 0.1  | 83.8%  | 69.3  |
| Q38 | 310     | 101     | 0.6  | 78.3%  | 92.7  |
| Q39 | 82      | 18      | 0.4  | 87.8%  | 40.3  |
| Q41 | 4,206   | 1,342   | 0.1  | 91.5%  | 70.5  |
| Q43 | 1,561   | 962     | 4.1  | 36.3%  | 80.5  |
| Q44 | 88      | 44      | 1.0  | 74.8%  | 87.9  |
| Q45 | 21      | 11      | 1.4  | 67.4%  | 56.5  |
| Q47 | 204     | 171     | 3.3  | 41.2%  | 63.2  |
| Q49 | 7,940   | 4,342   | 0.9  | 62.2%  | 90.2  |
| Q50 | 159     | 151     | 2.1  | 64.8%  | 43.7  |
| Q51 | 151     | 94      | 3.1  | 67.4%  | 49.5  |
| Q52 | 203     | 100     | 0.7  | 66.1%  | 93.9  |
| Q54 | 1,553   | 795     | 0.6  | 59.4%  | 100.6 |
| Q55 | 7,103   | 4,495   | 1.2  | 81.9%  | 44.0  |
| Q56 | 15      | 16      | 0.5  | 46.7%  | 94.4  |
| Q57 | 8       | 3       | 0.4  | 75.0%  | 80.8  |
| S01 | 547     | 175     | 0.4  | 74.0%  | 115.0 |
| S02 | 477     | 101     | 4.4  | 6.1%   | 124.1 |
| S03 | 136     | 48      | 1.0  | 59.6%  | 108.0 |
| S04 | 1,032   | 260     | 0.6  | 79.1%  | 79.2  |
| S05 | 2,630   | 1,943   | 0.0  | 98.3%  | 92.7  |
| S06 | 203,861 | 141,448 | 0.1  | 96.6%  | 51.8  |
| S08 | 6,905   | 5,251   | 0.2  | 98.1%  | 45.6  |
| S10 | 320     | 173     | 0.6  | 94.3%  | 59.0  |
| S11 | 400     | 231     | 0.7  | 89.3%  | 62.3  |
| S17 | 42      | 28      | 17.2 | 4.7%   | 61.7  |
| S18 | 126     | 93      | 10.3 | 1.6%   | 77.0  |
| S19 | 8       | 12      | 9.6  | 35.5%  | 52.8  |
| S20 | 30      | 24      | 16.3 | 13.4%  | 116.8 |
| S21 | 5       | 2       | 11.9 | 21.4%  | 29.5  |
| S22 | 18      | 15      | 2.2  | 66.6%  | 3.0   |
| S23 | 399     | 138     | 0.4  | 83.0%  | 139.0 |



|     |        |        |      |        |       |
|-----|--------|--------|------|--------|-------|
| S24 | 80     | 56     | 18.0 | 17.4%  | 48.8  |
| S25 | 90     | 43     | 10.0 | 15.6%  | 44.2  |
| S26 | 86     | 47     | 7.5  | 60.4%  | 32.3  |
| S27 | 1,218  | 1,141  | 1.6  | 90.9%  | 51.5  |
| S28 | 5      | 5      | 0.6  | 80.0%  | 25.3  |
| S29 | 0      | 4      | -    | 0.0%   | 0.0   |
| S30 | 303    | 145    | 1.3  | 72.6%  | 63.7  |
| S31 | 405    | 180    | 2.1  | 74.2%  | 108.3 |
| S32 | 0      | 1      | -    | 0.0%   | 0.0   |
| S33 | 264    | 0      | 0.1  | 100.0% | 135.2 |
| S34 | 0      | 0      | -    | 0.0%   | 0.0   |
| S35 | 2,488  | 1,309  | 6.5  | 52.0%  | 24.6  |
| S36 | 843    | 670    | 1.2  | 91.7%  | 49.5  |
| S37 | 105    | 57     | 9.9  | 57.0%  | 57.7  |
| S38 | 1      | 1      | 0.0  | 100.0% | 228.0 |
| S39 | 36     | 9      | 0.5  | 69.4%  | 123.1 |
| S40 | 66     | 56     | 1.8  | 74.4%  | 18.4  |
| S41 | 765    | 581    | 1.4  | 86.4%  | 11.1  |
| S42 | 4,850  | 3,569  | 1.2  | 86.7%  | 4.9   |
| S43 | 2,000  | 974    | 1.5  | 87.8%  | 51.6  |
| S47 | 8,141  | 5,094  | 2.2  | 73.0%  | 21.6  |
| S48 | 226    | 48     | 1.1  | 37.2%  | 105.3 |
| S49 | 440    | 127    | 0.9  | 65.6%  | 67.4  |
| S54 | 176    | 85     | 3.1  | 63.6%  | 29.9  |
| S55 | 1,655  | 943    | 2.3  | 73.3%  | 4.6   |
| S56 | 666    | 365    | 2.6  | 74.7%  | 24.5  |
| S57 | 12,819 | 9,758  | 5.4  | 62.6%  | 19.8  |
| S60 | 3,125  | 1,235  | 0.8  | 84.2%  | 90.7  |
| S62 | 1,477  | 628    | 0.5  | 81.7%  | 109.9 |
| S63 | 13     | 11     | 10.1 | 61.5%  | 88.7  |
| S64 | 2,268  | 803    | 0.1  | 96.7%  | 68.5  |
| S66 | 5,217  | 3,223  | 0.2  | 96.9%  | 15.5  |
| S68 | 3,630  | 1,507  | 0.3  | 96.3%  | 65.6  |
| S70 | 1,941  | 920    | 0.4  | 96.0%  | 50.4  |
| T01 | 700    | 481    | 2.5  | 55.4%  | 47.7  |
| T02 | 555    | 200    | 4.1  | 18.2%  | 108.2 |
| T03 | 212    | 100    | 10.0 | 2.8%   | 43.5  |
| T05 | 981    | 646    | 5.0  | 28.3%  | 45.5  |
| T07 | 813    | 424    | 9.4  | 0.0%   | 23.6  |
| T08 | 336    | 211    | 8.0  | 3.6%   | 69.4  |
| T09 | 713    | 411    | 5.5  | 3.6%   | 18.5  |
| T10 | 1,753  | 1,018  | 6.1  | 4.6%   | 12.9  |
| T11 | 973    | 735    | 2.6  | 21.2%  | 12.6  |
| T14 | 884    | 824    | 2.5  | 65.7%  | 10.3  |
| T15 | 0      | 5      | 6.9  | 0.0%   | 0.0   |
| T16 | 294    | 141    | 8.6  | 0.0%   | 54.0  |
| T17 | 34     | 43     | 3.5  | 8.8%   | 53.8  |
| T19 | 4,866  | 2,652  | 0.9  | 83.0%  | 78.5  |
| T20 | 61,350 | 26,396 | 0.5  | 79.3%  | 82.7  |
| T21 | 5,115  | 2,002  | 0.8  | 71.7%  | 90.5  |
| T22 | 1,754  | 766    | 2.8  | 72.0%  | 73.4  |
| T23 | 160    | 56     | 2.0  | 68.8%  | 87.5  |
| T24 | 19,454 | 7,430  | 0.7  | 83.6%  | 86.4  |
| T25 | 7,747  | 2,935  | 3.5  | 28.5%  | 113.2 |
| T26 | 1,424  | 513    | 4.0  | 22.3%  | 121.4 |
| T27 | 6,533  | 2,331  | 1.2  | 73.8%  | 91.5  |
| T28 | 418    | 202    | 9.1  | 22.2%  | 109.7 |
| T29 | 735    | 410    | 1.1  | 81.1%  | 77.2  |
| T30 | 691    | 416    | 7.4  | 17.5%  | 66.4  |
| T31 | 2,338  | 1,573  | 4.0  | 61.1%  | 56.6  |
| T32 | 391    | 225    | 7.9  | 5.4%   | 153.7 |
| T33 | 284    | 222    | 7.0  | 18.3%  | 53.5  |
| T34 | 192    | 131    | 9.1  | 24.5%  | 47.1  |
| T36 | 1,774  | 1,668  | 3.4  | 54.4%  | 21.9  |
| T37 | 236    | 209    | 4.7  | 34.3%  | 32.1  |
| T38 | 72     | 56     | 4.8  | 25.0%  | 32.6  |
| T39 | 393    | 381    | 6.7  | 28.3%  | 29.7  |
| T41 | 1,925  | 1,342  | 8.1  | 31.0%  | 67.7  |
| T42 | 9,049  | 4,578  | 1.2  | 70.2%  | 92.7  |
| T43 | 14,430 | 6,717  | 0.8  | 81.3%  | 69.1  |
| T45 | 1,522  | 1,277  | 10.1 | 39.6%  | 15.8  |

|     |        |        |      |       |       |
|-----|--------|--------|------|-------|-------|
| T48 | 206    | 226    | 1.9  | 81.9% | 32.3  |
| T50 | 11     | 3      | 1.4  | 9.1%  | 85.1  |
| T51 | 10     | 10     | 6.7  | 60.0% | 141.2 |
| T52 | 14,308 | 5,098  | 0.1  | 95.5% | 99.4  |
| T53 | 450    | 384    | 0.9  | 78.0% | 61.0  |
| T54 | 1,904  | 860    | 0.5  | 95.6% | 94.2  |
| T55 | 617    | 184    | 4.1  | 68.1% | 107.6 |
| T56 | 737    | 309    | 0.3  | 87.1% | 115.3 |
| T57 | 2,122  | 507    | 0.4  | 95.6% | 77.8  |
| T59 | 7,315  | 2,102  | 0.0  | 97.7% | 75.6  |
| T60 | 267    | 99     | 0.1  | 95.1% | 95.5  |
| T61 | 616    | 178    | 0.1  | 99.1% | 66.8  |
| T62 | 12,317 | 3,589  | 0.4  | 96.2% | 83.3  |
| T64 | 1,686  | 742    | 0.8  | 64.4% | 112.3 |
| T65 | 943    | 436    | 0.8  | 82.4% | 82.1  |
| T67 | 10,607 | 7,386  | 0.9  | 77.3% | 30.2  |
| T68 | 447    | 232    | 1.5  | 67.6% | 80.3  |
| T69 | 2,870  | 908    | 0.2  | 89.1% | 94.6  |
| T70 | 4,323  | 1,684  | 0.7  | 71.2% | 103.0 |
| T71 | 480    | 156    | 0.3  | 93.1% | 80.0  |
| T72 | 11,614 | 4,692  | 0.4  | 96.3% | 77.7  |
| T74 | 7,994  | 2,432  | 0.2  | 97.1% | 76.9  |
| T76 | 90     | 30     | 10.2 | 6.6%  | 135.4 |
| T77 | 2,109  | 1,367  | 2.8  | 49.5% | 71.3  |
| T79 | 9,691  | 4,310  | 0.5  | 70.9% | 78.8  |
| T80 | 524    | 222    | 0.6  | 70.0% | 110.8 |
| T81 | 2,221  | 1,359  | 2.0  | 83.7% | 70.4  |
| T83 | 830    | 666    | 6.7  | 63.8% | 81.7  |
| T85 | 4,593  | 4,245  | 3.1  | 21.1% | 20.9  |
| T86 | 342    | 238    | 2.0  | 65.1% | 18.5  |
| T87 | 14,277 | 11,131 | 2.1  | 73.6% | 16.7  |
| T88 | 162    | 106    | 3.2  | 70.6% | 17.5  |
| T89 | 28     | 15     | 11.3 | 46.7% | 175.7 |
| T90 | 5      | 13     | 0.0  | 40.0% | 0.0   |
| T91 | 108    | 51     | 0.6  | 78.7% | 17.9  |
| T92 | 309    | 161    | 2.3  | 70.6% | 65.6  |
| T94 | 610    | 378    | 0.9  | 41.2% | 74.7  |
| T96 | 6,870  | 4,468  | 1.8  | 79.7% | 63.9  |
| T97 | 1,237  | 470    | 1.1  | 65.5% | 92.5  |
| T98 | 588    | 222    | 1.5  | 62.8% | 96.5  |
| V01 | 914    | 487    | 8.8  | 2.3%  | 86.8  |
| V02 | 127    | 78     | 5.5  | 2.4%  | 88.5  |
| V03 | 211    | 180    | 16.2 | 1.9%  | 49.8  |
| V04 | 20     | 7      | 0.4  | 80.0% | 45.7  |
| V05 | 563    | 324    | 5.0  | 32.1% | 72.5  |
| V06 | 493    | 405    | 5.8  | 22.1% | 37.7  |
| V07 | 225    | 124    | 2.3  | 56.9% | 70.2  |
| V08 | 104    | 73     | 2.8  | 15.4% | 5.4   |
| V09 | 6,816  | 1,522  | 0.3  | 86.1% | 6.0   |
| V10 | 1,936  | 506    | 1.6  | 2.2%  | 136.9 |
| V11 | 541    | 232    | 0.9  | 65.5% | 52.5  |
| V12 | 208    | 150    | 4.7  | 9.1%  | 88.1  |
| V13 | 659    | 324    | 1.0  | 37.5% | 96.4  |
| V14 | 1,077  | 868    | 7.3  | 36.2% | 53.3  |
| V15 | 453    | 229    | 2.1  | 18.5% | 6.2   |
| V16 | 853    | 306    | 1.4  | 3.6%  | 130.0 |
| V17 | 1,224  | 632    | 1.3  | 77.3% | 59.1  |
| V18 | 153    | 109    | 1.7  | 44.5% | 73.8  |
| V19 | 924    | 492    | 1.5  | 68.3% | 61.0  |
| V20 | 201    | 76     | 1.9  | 6.0%  | 148.1 |
| V21 | 2,205  | 762    | 0.3  | 87.8% | 109.8 |
| V22 | 6,097  | 3,499  | 4.8  | 1.7%  | 91.2  |
| V23 | 170    | 86     | 4.7  | 1.8%  | 122.9 |
| V24 | 470    | 393    | 11.6 | 0.0%  | 77.7  |
| V25 | 16,795 | 8,118  | 2.8  | 8.8%  | 103.1 |
| V26 | 1,934  | 936    | 3.8  | 7.3%  | 113.4 |
| V27 | 55     | 12     | 4.5  | 7.3%  | 135.5 |
| V28 | 51     | 11     | 2.3  | 5.9%  | 130.7 |
| V29 | 2,464  | 1,003  | 3.6  | 6.7%  | 102.6 |
| V30 | 33     | 15     | 3.1  | 6.1%  | 167.8 |
| V31 | 75     | 37     | 11.6 | 0.0%  | 88.9  |

|     |        |        |      |        |       |
|-----|--------|--------|------|--------|-------|
| V32 | 1      | 0      | 6.0  | 0.0%   | 316.0 |
| V33 | 3,812  | 1,582  | 2.2  | 16.9%  | 88.1  |
| V34 | 561    | 227    | 2.4  | 13.5%  | 112.1 |
| V35 | 13     | 9      | 2.7  | 7.8%   | 134.8 |
| V36 | 229    | 86     | 1.8  | 1.7%   | 94.6  |
| V37 | 94     | 67     | 9.0  | 1.1%   | 96.3  |
| V38 | 1,834  | 911    | 4.4  | 1.5%   | 154.9 |
| V39 | 263    | 113    | 5.9  | 0.4%   | 189.8 |
| V40 | 2,098  | 977    | 7.8  | 2.7%   | 120.8 |
| V41 | 2,536  | 1,528  | 6.1  | 8.2%   | 143.4 |
| V42 | 87     | 48     | 10.2 | 1.1%   | 102.2 |
| V43 | 243    | 151    | 6.8  | 9.0%   | 72.3  |
| V44 | 1,495  | 599    | 3.8  | 36.3%  | 54.8  |
| V45 | 19     | 11     | 9.2  | 36.9%  | 84.1  |
| V46 | 441    | 259    | 11.2 | 3.9%   | 100.4 |
| V47 | 624    | 587    | 6.9  | 55.0%  | 27.3  |
| V48 | 16,597 | 7,088  | 0.0  | 99.4%  | 172.6 |
| V49 | 26     | 12     | 8.4  | 15.4%  | 83.4  |
| V50 | 372    | 168    | 2.9  | 76.7%  | 80.2  |
| V51 | 170    | 111    | 7.8  | 0.6%   | 121.1 |
| V52 | 343    | 142    | 6.6  | 68.0%  | 111.7 |
| V54 | 44,683 | 11,200 | 0.2  | 99.0%  | 124.9 |
| V55 | 3      | 7      | 0.0  | 100.0% | 85.7  |
| V56 | 3      | 0      | 1.0  | 33.3%  | 65.0  |
| V57 | 1      | 0      | 1.0  | 0.0%   | 37.0  |
| V66 | 2      | 4      | 16.3 | 0.0%   | 141.0 |
| V67 | 1,591  | 663    | 2.7  | 5.0%   | 103.5 |
| V68 | 133    | 57     | 2.4  | 0.8%   | 96.1  |
| V69 | 0      | 505    | -    | 0.0%   | 0.0   |
| V70 | 0      | 10     | -    | 0.0%   | 0.0   |
| W01 | 61     | 28     | 1.5  | 39.3%  | 177.0 |
| W02 | 202    | 80     | 0.7  | 60.9%  | 126.6 |
| W03 | 3,162  | 957    | 0.9  | 62.6%  | 115.7 |
| W04 | 2,222  | 816    | 3.2  | 9.8%   | 136.1 |
| W05 | 641    | 459    | 14.2 | 3.3%   | 68.3  |
| W06 | 6,616  | 2,700  | 0.6  | 83.3%  | 112.1 |
| W07 | 79     | 14     | 1.7  | 50.6%  | 112.7 |
| W08 | 8,114  | 3,149  | 1.3  | 76.4%  | 97.7  |
| W09 | 2,385  | 1,358  | 2.0  | 59.8%  | 83.4  |
| W10 | 105    | 55     | 4.5  | 32.4%  | 93.5  |
| W11 | 8      | 4      | 0.4  | 75.0%  | 139.6 |
| W12 | 1,671  | 414    | 1.4  | 44.6%  | 109.9 |
| W13 | 6,572  | 2,250  | 0.9  | 65.1%  | 100.0 |
| W14 | 542    | 213    | 1.0  | 70.1%  | 138.4 |
| W15 | 5,283  | 1,566  | 0.4  | 80.6%  | 105.4 |
| W16 | 2,460  | 1,057  | 2.3  | 34.3%  | 123.4 |
| W17 | 591    | 254    | 3.0  | 50.4%  | 115.5 |
| W18 | 182    | 84     | 5.2  | 30.8%  | 73.2  |
| W19 | 6,968  | 4,829  | 6.0  | 59.9%  | 25.9  |
| W20 | 15,417 | 11,699 | 3.8  | 50.0%  | 14.4  |
| W21 | 1,142  | 1,020  | 3.8  | 54.9%  | 15.3  |
| W22 | 122    | 80     | 7.1  | 67.0%  | 13.5  |
| W23 | 6,198  | 5,319  | 3.6  | 49.4%  | 21.6  |
| W24 | 6,839  | 4,238  | 7.2  | 74.0%  | 6.3   |
| W25 | 404    | 277    | 6.9  | 49.5%  | 9.0   |
| W26 | 3,776  | 2,107  | 1.5  | 88.3%  | 6.1   |
| W27 | 1,048  | 784    | 1.3  | 39.6%  | 96.1  |
| W28 | 29,995 | 13,779 | 1.1  | 79.9%  | 82.2  |
| W29 | 46     | 10     | 13.8 | 54.0%  | 33.7  |
| W30 | 2,650  | 1,432  | 3.9  | 66.0%  | 40.9  |
| W31 | 244    | 108    | 2.0  | 41.4%  | 82.2  |
| W32 | 104    | 49     | 4.3  | 35.6%  | 89.5  |
| W33 | 1,911  | 1,080  | 4.3  | 62.2%  | 55.3  |
| W37 | 29,288 | 10,574 | 5.0  | 0.6%   | 114.0 |
| W38 | 29,501 | 10,358 | 3.9  | 0.4%   | 108.5 |
| W39 | 1,341  | 1,026  | 6.5  | 1.0%   | 117.0 |
| W40 | 82,315 | 26,232 | 3.9  | 0.4%   | 118.7 |
| W41 | 2,419  | 844    | 4.1  | 0.4%   | 118.0 |
| W42 | 1,826  | 1,145  | 10.2 | 7.1%   | 119.4 |
| W43 | 137    | 58     | 4.3  | 19.0%  | 142.2 |
| W44 | 1,073  | 326    | 0.4  | 73.6%  | 126.0 |

|     |        |        |      |        |       |
|-----|--------|--------|------|--------|-------|
| W45 | 725    | 250    | 0.9  | 74.5%  | 129.4 |
| W46 | 291    | 283    | 12.1 | 0.0%   | 98.5  |
| W47 | 98     | 55     | 12.8 | 6.1%   | 111.1 |
| W48 | 45     | 22     | 12.5 | 8.9%   | 123.9 |
| W49 | 245    | 121    | 6.5  | 1.6%   | 69.0  |
| W50 | 428    | 128    | 3.1  | 3.3%   | 108.7 |
| W51 | 101    | 31     | 4.7  | 3.0%   | 107.9 |
| W52 | 110    | 66     | 6.4  | 13.7%  | 106.3 |
| W53 | 172    | 47     | 0.9  | 61.1%  | 122.3 |
| W54 | 339    | 128    | 0.5  | 80.3%  | 129.6 |
| W55 | 786    | 287    | 0.2  | 86.8%  | 119.2 |
| W56 | 784    | 277    | 0.3  | 81.6%  | 112.2 |
| W57 | 2,663  | 935    | 3.4  | 78.8%  | 97.5  |
| W58 | 10,535 | 4,381  | 2.5  | 6.1%   | 122.8 |
| W59 | 9,349  | 2,980  | 0.3  | 79.2%  | 105.6 |
| W60 | 740    | 312    | 1.7  | 32.2%  | 132.8 |
| W61 | 1,029  | 359    | 1.7  | 32.8%  | 114.9 |
| W62 | 5,573  | 2,029  | 1.2  | 57.7%  | 123.6 |
| W63 | 428    | 164    | 2.5  | 41.1%  | 113.5 |
| W64 | 72     | 26     | 6.7  | 34.7%  | 108.1 |
| W65 | 1,376  | 1,015  | 3.5  | 50.9%  | 9.8   |
| W66 | 1,207  | 821    | 2.5  | 78.1%  | 11.2  |
| W67 | 1,146  | 1,113  | 4.5  | 45.8%  | 9.1   |
| W68 | 59     | 67     | 1.6  | 67.6%  | 6.3   |
| W69 | 2,523  | 1,062  | 1.7  | 79.0%  | 82.9  |
| W70 | 123    | 81     | 1.2  | 68.3%  | 96.0  |
| W71 | 2,508  | 849    | 0.3  | 81.3%  | 99.0  |
| W72 | 165    | 161    | 0.9  | 53.4%  | 85.4  |
| W73 | 189    | 72     | 1.0  | 58.2%  | 87.3  |
| W74 | 13,849 | 6,838  | 0.6  | 54.1%  | 108.1 |
| W75 | 1,571  | 851    | 0.6  | 82.8%  | 55.3  |
| W76 | 689    | 240    | 0.3  | 88.4%  | 83.3  |
| W77 | 3,713  | 1,698  | 1.0  | 58.2%  | 110.4 |
| W78 | 5,189  | 1,793  | 0.4  | 79.5%  | 91.8  |
| W79 | 5,337  | 1,500  | 0.2  | 82.5%  | 110.8 |
| W80 | 4,786  | 1,771  | 5.0  | 69.7%  | 93.0  |
| W81 | 2,265  | 817    | 2.8  | 74.2%  | 98.1  |
| W82 | 41,591 | 14,938 | 0.1  | 93.0%  | 73.1  |
| W83 | 5,645  | 1,658  | 0.3  | 81.5%  | 94.8  |
| W84 | 5,633  | 2,249  | 0.4  | 75.4%  | 101.1 |
| W85 | 2,618  | 1,154  | 4.2  | 78.4%  | 77.1  |
| W86 | 622    | 257    | 0.5  | 84.9%  | 95.1  |
| W87 | 2,469  | 811    | 0.4  | 89.7%  | 86.7  |
| W88 | 984    | 346    | 0.4  | 88.7%  | 94.7  |
| W89 | 2,518  | 802    | 0.2  | 88.9%  | 95.8  |
| W91 | 5,892  | 1,734  | 1.3  | 68.9%  | 87.9  |
| W92 | 1,784  | 817    | 0.9  | 90.0%  | 64.9  |
| W93 | 2,592  | 922    | 4.3  | 0.4%   | 103.8 |
| W94 | 20,787 | 9,304  | 4.1  | 0.4%   | 107.6 |
| W95 | 580    | 438    | 5.4  | 0.3%   | 129.3 |
| W96 | 1,982  | 625    | 3.4  | 1.5%   | 119.4 |
| W97 | 3,439  | 1,166  | 2.9  | 1.2%   | 129.0 |
| W98 | 707    | 285    | 4.8  | 1.7%   | 123.8 |
| X01 | 14     | 9      | 5.3  | 55.8%  | 7.8   |
| X02 | 3      | 0      | 0.6  | 40.0%  | 59.5  |
| X03 | 5      | 2      | 3.1  | 80.0%  | 144.3 |
| X04 | 1      | 0      | 0.0  | 100.0% | 0.0   |
| X05 | 8      | 3      | 4.3  | 25.0%  | 33.8  |
| X07 | 64     | 56     | 11.5 | 3.1%   | 40.7  |
| X08 | 2,093  | 1,501  | 1.7  | 84.8%  | 46.0  |
| X09 | 1,996  | 1,474  | 21.1 | 0.1%   | 48.2  |
| X10 | 740    | 572    | 14.2 | 15.3%  | 30.8  |
| X11 | 4,701  | 2,668  | 7.0  | 49.0%  | 48.1  |
| X12 | 997    | 514    | 9.0  | 37.5%  | 66.3  |
| X14 | 671    | 643    | 13.9 | 0.1%   | 29.2  |
| X15 | 287    | 152    | 6.6  | 0.0%   | 161.7 |
| X16 | 52     | 24     | 1.1  | 32.7%  | 81.2  |
| X17 | 0      | 0      | 3.0  | 0.0%   | 0.0   |
| X19 | 22     | 18     | 2.0  | 4.5%   | 122.4 |
| X20 | 11     | 6      | 1.0  | 54.5%  | 89.1  |
| X21 | 1,276  | 657    | 0.4  | 91.3%  | 98.0  |

|     |       |     |     |       |       |
|-----|-------|-----|-----|-------|-------|
| X22 | 1,013 | 623 | 3.9 | 5.8%  | 113.7 |
| X23 | 28    | 20  | 2.5 | 28.6% | 133.4 |
| X24 | 147   | 81  | 1.4 | 20.4% | 137.6 |
| X25 | 385   | 169 | 1.1 | 34.3% | 128.6 |
| X27 | 481   | 175 | 0.2 | 91.7% | 134.4 |
| X45 | 696   | 314 | 3.6 | 0.6%  | 33.4  |
| X46 | 136   | 74  | 1.3 | 32.4% | 19.9  |
| X55 | 1,010 | 948 | 2.7 | 72.5% | 11.8  |

AHES-APC: Annual Hospital Episode Statistics Hospital Admitted Patient Care Activity

The number of elective procedures was estimated from raw AHES-APC data as described in the methods

**Supplementary Table 3: Procedural costs mapped to Health Resource Groups**

| Procedure                                   | Health Resource Group                                                                             | Cost per procedure |
|---------------------------------------------|---------------------------------------------------------------------------------------------------|--------------------|
| <b>Breast surgery</b>                       |                                                                                                   |                    |
| Excision of breast                          | Malignant Breast Disorders with Interventions, with CC Score 0-2                                  | £3,724             |
| Other daycase breast surgery                | Non-Malignant Breast Disorders with Interventions                                                 | £27,863            |
| Other inpatient breast surgery              | Non-Malignant Breast Disorders with Interventions                                                 | £27,863            |
| <b>Cardiac surgery</b>                      |                                                                                                   |                    |
| Coronary artery surgery                     | Standard Coronary Artery Bypass Graft with CC Score 0-4                                           | £11,292            |
| Other daycase cardiac surgery               | Standard, Other Operations on Heart or Pericardium, with CC Score 0-4                             | £7,612             |
| Other inpatient cardiac surgery             | Standard, Other Operations on Heart or Pericardium, with CC Score 0-4                             | £7,612             |
| Surgery on the great vessels                | Standard Repair of Aortic Root with CC Score 0-6                                                  | £14,559            |
| Valvular heart surgery                      | Standard, Single Heart Valve Replacement or Repair, with CC Score 0-5                             | £12,082            |
| <b>Cardiology</b>                           |                                                                                                   |                    |
| Interventional cardiology                   | Standard Percutaneous Transluminal Coronary Angioplasty with CC Score 0-3                         | £2,885             |
| <b>Colorectal surgery</b>                   |                                                                                                   |                    |
| Colorectal resection                        | Malignant Gastrointestinal Tract Disorders with Single Intervention, with CC Score 0-2            | £3,544             |
| Ileostomy, colostomy                        | Non-Malignant Gastrointestinal Tract Disorders with Single Intervention, with CC Score 0-2        | £3,710             |
| Other daycase colorectal surgery            | Intermediate Anal Procedures, 19 years and over, with CC Score 1-2                                | £2,200             |
| Other inpatient colorectal surgery          | Non-Malignant Gastrointestinal Tract Disorders with Single Intervention, with CC Score 0-2        | £3,710             |
| Proctology                                  | Minor Anal Procedures                                                                             | £1,728             |
| Sigmoidoscopy, colonoscopy                  | Diagnostic Colonoscopy with Biopsy, 19 years and over                                             | £1,176             |
| <b>General surgery</b>                      |                                                                                                   |                    |
| Diagnostic laparoscopy                      | Intermediate Therapeutic General Abdominal Procedures, 19 years and over, with CC Score 1-2       | £4,237             |
| Excision of lymph node                      | Minor Therapeutic or Diagnostic, General Abdominal Procedures, 19 years and over                  | £1,392             |
| Excision of thyroid, parathyroid            | Thyroid Procedures with CC Score 0-1                                                              | £4,515             |
| Groin hernia repair                         | Inguinal, Umbilical or Femoral Hernia Procedures, 19 years and over, with CC Score 1-2            | £3,132             |
| Other daycase endocrine surgery             | Thyroid Procedures with CC Score 0-1                                                              | £4,515             |
| Other daycase general surgery               | Minor Therapeutic or Diagnostic, General Abdominal Procedures, 19 years and over                  | £1,392             |
| Other inpatient endocrine surgery           | Adrenal Procedures with CC Score 0-1                                                              | £6,123             |
| Other inpatient general surgery             | Major General Abdominal Procedures, 19 years and over, with CC Score 1-2                          | £5,785             |
| Other interventional radiology              | Percutaneous Single Drainage of Abdominal Abscess, with CC Score 0-1                              | £2,285             |
| Ventral hernia repair                       | Abdominal Hernia Procedures, 19 years and over, with CC Score 1-3                                 | £4,725             |
| <b>Gynaecology</b>                          |                                                                                                   |                    |
| Excision of vulva, vagina, cervix           | Major Open Lower Genital Tract Procedures with CC Score 0-2                                       | £3,484             |
| Female sterilisation                        | Minor, Laparoscopic or Endoscopic, Upper Genital Tract Procedures                                 | £2,624             |
| Hysterectomy, salpingoophorectomy           | Major Open Upper Genital Tract Procedures with CC Score 0-2                                       | £4,897             |
| Hysteroscopy & related procedures           | Diagnostic Hysteroscopy                                                                           | £1,853             |
| Other daycase gynaecology                   | Minor Lower Genital Tract Procedures                                                              | £2,002             |
| Other inpatient gynaecology                 | Intermediate, Laparoscopic or Endoscopic, Upper Genital Tract Procedures, with CC Score 0-1       | £3,194             |
| Ovarian surgery                             | Major, Laparoscopic or Endoscopic, Upper Genital Tract Procedures, with CC Score 0-1              | £4,507             |
| Repair of prolapse of vagina                | Intermediate Open Lower Genital Tract Procedures with CC Score 0-2                                | £2,829             |
| <b>Head &amp; Neck surgery</b>              |                                                                                                   |                    |
| Adenoidectomy                               | Adenoidectomy                                                                                     | £1,961             |
| Laryngoscopy                                | Diagnostic, Laryngoscopy or Pharyngoscopy, 19 years and over                                      | £1,854             |
| Maxillofacial surgery                       | Major Maxillofacial Procedures, 19 years and over, with CC Score 1+                               | £6,101             |
| Operations on ear                           | Intermediate Ear Procedures, 19 years and over                                                    | £3,102             |
| Operations on larynx, pharynx               | Major, Mouth or Throat Procedures, 19 years and over, with CC Score 0-1                           | £3,818             |
| Operations on nose                          | Intermediate Nose Procedures                                                                      | £2,666             |
| Oral surgery                                | Intermediate, Mouth or Throat Procedures, 19 years and over, with CC Score 0-1                    | £2,743             |
| Tonsillectomy                               | Tonsillectomy, 4 years and over                                                                   | £2,183             |
| <b>Hepatobiliary surgery</b>                |                                                                                                   |                    |
| Cholecystectomy                             | Laparoscopic Cholecystectomy, 19 years and over, with CC Score 1-3                                | £3,939             |
| Diagnostic percutaneous operations on liver | Non-Malignant, Hepatobiliary or Pancreatic Disorders, with Single Intervention, with CC Score 0-3 | £3,195             |
| ERCP & related procedures                   | Intermediate Therapeutic Endoscopic Retrograde Cholangiopancreatography with CC Score 0-1         | £1,947             |
| Excision of liver, pancreas, spleen         | Very Major, Hepatobiliary or Pancreatic Procedures, with CC Score 0-2                             | £8,088             |
| Other daycase hepatobiliary surgery         | Minor, Hepatobiliary or Pancreatic Procedures, with CC Score 1+                                   | £4,603             |
| Other inpatient hepatobiliary surgery       | Very Major, Hepatobiliary or Pancreatic Procedures, with CC Score 0-2                             | £8,088             |

|                                                    |                                                                                                                             |         |
|----------------------------------------------------|-----------------------------------------------------------------------------------------------------------------------------|---------|
| Other interventional radiology                     | Other Percutaneous Therapeutic, Hepatobiliary or Pancreatic Procedures, with CC Score 0-2                                   | £2,772  |
| <b>Neurosurgery</b>                                |                                                                                                                             |         |
| Brain tissue surgery                               | Complex Intracranial Procedures, 18 years and under, with CC Score 0-3                                                      | £12,140 |
| Brain ventricular surgery                          | Complex Intracranial Procedures, 18 years and under, with CC Score 0-3                                                      | £12,140 |
| Cranial nerve surgery                              | Very Major Intracranial Procedures, 18 years and under, with CC Score 0-3                                                   | £7,233  |
| Cranium and dural surgery                          | Very Major Intracranial Procedures, 18 years and under, with CC Score 0-3                                                   | £7,233  |
| Neurovascular interventional radiology             | Percutaneous Transluminal Embolisation of, Single Small or Medium, Intracranial or Extracranial Aneurysm, with CC Score 0-3 | £5,568  |
| Other inpatient neurosurgery                       | Major Intracranial Procedures, 18 years and under, with CC Score 0-3                                                        | £8,188  |
| <b>Oesophagogastric surgery</b>                    |                                                                                                                             |         |
| Gastrosocopy                                       | Diagnostic Endoscopic Upper Gastrointestinal Tract Procedures, 19 years and over                                            | £999    |
| Gastrostomy, jejunostomy                           | Radiological Insertion of Gastrostomy Tube, 19 years and over                                                               | £1,496  |
| Oesophagogastric resection                         | Complex, Oesophageal, Stomach or Duodenum Procedures, 19 years and over, with CC Score 0-1                                  | £6,840  |
| Other daycase oesophagogastric surgery             | Intermediate Upper Gastrointestinal Tract Procedures, 19 years and over                                                     | £1,464  |
| Other inpatient oesophagogastric surgery           | Major, Oesophageal, Stomach or Duodenum Procedures, 19 years and over, with CC Score 0-1                                    | £5,091  |
| <b>Ophthalmology</b>                               |                                                                                                                             |         |
| Cataract surgery                                   | Intermediate, Cataract or Lens Procedures, with CC Score 0-1                                                                | £3,557  |
| Glaucoma surgery                                   | Minor, Glaucoma or Iris Procedures                                                                                          | £1,432  |
| Operations on vitreous body of eye                 | Intermediate Vitreous Retinal Procedures, 19 years and over, with CC Score 0-1                                              | £1,320  |
| Other daycase ophthalmology                        | Intermediate Oculoplastics Procedures, 19 years and over, with CC Score 0-1                                                 | £2,087  |
| Other inpatient ophthalmology                      | Major, Orbit or Lacrimal Procedures, 19 years and over, with CC Score 1+                                                    | £3,096  |
| <b>Orthopaedics</b>                                |                                                                                                                             |         |
| Arthroscopic procedures                            | Minor Knee Procedures for Non-Trauma, 19 years and over                                                                     | £2,262  |
| Daycase procedures on joint                        | General orthopaedics (non-trauma)*                                                                                          | £3,960  |
| Decompression of cervical spine                    | Percutaneous Vertebroplasty of One Level of Spine                                                                           | £3,697  |
| Decompression of lumbar spine                      | Percutaneous Vertebroplasty of One Level of Spine                                                                           | £3,697  |
| Denervation of spinal facet joint                  | Denervation or Injection around Spinal Facet, for Pain Management                                                           | £916    |
| Division or excision of bone                       | Malignancy, of Bone or Connective Tissue, with CC Score 0-1                                                                 | £2,179  |
| Excision of ganglion                               | Soft Tissue Disorders with CC Score 0-2                                                                                     | £1,001  |
| Fasciectomy, fasciotomy                            | Soft Tissue Disorders with CC Score 0-2                                                                                     | £1,001  |
| Fracture-related surgery                           | General orthopaedics (trauma)*                                                                                              | £3,710  |
| Fusion of joint                                    | General orthopaedics (non-trauma)*                                                                                          | £3,960  |
| Fusion of joint of toe                             | Major Foot Procedures for Non-Trauma, 19 years and over, with CC Score 0-1                                                  | £4,975  |
| Lower limb joint replacement                       | Complex, Hip or Knee Procedures for Non-Trauma, with CC Score 0-1                                                           | £9,775  |
| Operations on bursa                                | Minor Knee Procedures for Non-Trauma, 19 years and over                                                                     | £2,262  |
| Other daycase orthopaedics                         | General orthopaedics (non-trauma)*                                                                                          | £3,960  |
| Other daycase spinal surgery                       | Intermediate Extradural Spinal Procedures with CC Score 0-1                                                                 | £4,884  |
| Other inpatient orthopaedics                       | General orthopaedics (non-trauma)*                                                                                          | £3,960  |
| Other inpatient spinal surgery                     | Major Extradural Spinal Procedures with CC Score 0-1                                                                        | £5,667  |
| Other reconstruction of joint                      | General orthopaedics (non-trauma)*                                                                                          | £3,960  |
| Procedures on nail, nail bed                       | Soft Tissue Disorders with CC Score 0-2                                                                                     | £1,001  |
| Procedures on peripheral nerves                    | Minor Hand Procedures for Non-Trauma, 19 years and over                                                                     | £2,052  |
| Reconstruction of foot                             | Major Foot Procedures for Trauma, 19 years and over, with CC Score 1                                                        | £4,877  |
| Spinal fusion                                      | Major Spinal Reconstructive Procedures with CC Score 0-1                                                                    | £11,154 |
| Surgery on ligament, tendon, muscle                | Other Muscle, Tendon, Fascia or Ligament Procedures                                                                         | £4,844  |
| Upper limb joint replacement                       | Complex, Foot, Hand, Shoulder or Elbow Procedures for Non-Trauma, with CC Score 0-1                                         | £7,942  |
| <b>Plastic surgery</b>                             |                                                                                                                             |         |
| Excision of lesion of skin                         | Minor Skin Procedures, 19 years and over                                                                                    | £1,400  |
| Other daycase plastic surgery                      | Intermediate Skin Procedures, 19 years and over                                                                             | £2,157  |
| Other inpatient plastic surgery                    | Major Skin Procedures                                                                                                       | £7,680  |
| Procedure on eyelid                                | Minor Oculoplastics Procedures, 19 years and over                                                                           | £1,220  |
| Procedure on lip                                   | Minor, Mouth or Throat Procedures, 19 years and over                                                                        | £2,063  |
| <b>Thoracic surgery</b>                            |                                                                                                                             |         |
| Biopsy of lung                                     | Minor Thoracic Procedures                                                                                                   | £2,175  |
| Bronchoscopy                                       | Diagnostic Bronchoscopy, 19 years and over                                                                                  | £2,054  |
| Lung resection                                     | Major Thoracic Procedures, 19 years and over, with CC Score 0-2                                                             | £5,424  |
| Other daycase thoracic surgery                     | Minor Thoracic Procedures                                                                                                   | £2,175  |
| Other inpatient thoracic surgery                   | Intermediate Thoracic Procedures, 19 years and over, with CC Score 0-2                                                      | £3,999  |
| <b>Urology</b>                                     |                                                                                                                             |         |
| Cystectomy                                         | Cystectomy with Urinary Diversion and Reconstruction, with CC Score 0-2                                                     | £11,425 |
| Extracorporeal fragmentation of calculus of kidney | Urinary Tract Stone Disease with Interventions, with CC Score 0-2                                                           | £3,836  |
| Male sterilisation                                 | Minor, Scrotum, Testis or Vas Deferens Procedures, 19 years and over                                                        | £2,368  |
| Nephrectomy, uretectomy                            | Major Laparoscopic, Kidney or Ureter Procedures, 19 years and over, with CC Score 0-2                                       | £6,902  |
| Operations on bladder                              | Intermediate Open Bladder Procedures                                                                                        | £4,577  |
| Other daycase urology                              | Ureteric or Bladder Disorders, with Interventions, with CC Score 0-3                                                        | £2,723  |

|                                              |                                                                                           |         |
|----------------------------------------------|-------------------------------------------------------------------------------------------|---------|
| Other inpatient urology                      | Ureteric or Bladder Disorders, with Interventions, with CC Score 0-3                      | £2,723  |
| Other interventional radiology               | Unilateral, Percutaneous Insertion of, Ureteric Stent or Nephrostomy                      | £1,634  |
| Percutaneous puncture of kidney              | Other Percutaneous Therapeutic, Hepatobiliary or Pancreatic Procedures, with CC Score 0-2 | £2,772  |
| Prepuceplasty                                | Minor Penis Procedures, 19 years and over                                                 | £2,171  |
| Prostatectomy                                | Transurethral Prostate Resection Procedures with CC Score 0-2                             | £3,420  |
| Scrotal surgery                              | Scrotum, Testis or Vas Deferens Disorders, with Interventions, with CC Score 0-1          | £6,474  |
| Transplant surgery                           | Kidney Transplant, 19 years and over, from Live Donor                                     | £12,840 |
| Ureteric stent procedures                    | Unilateral, Percutaneous Insertion of, Ureteric Stent or Nephrostomy                      | £1,634  |
| Ureterscopy, cystoscopy & related procedures | Intermediate Endoscopic Ureter Procedures, 19 years and over                              | £2,115  |
| Urethral surgery                             | Minor or Intermediate, Urethra Procedures, 19 years and over                              | £1,723  |
| <b>Vascular surgery</b>                      |                                                                                           |         |
| Amputation of lower limb                     | Amputation of Single Limb with CC Score 0-9                                               | £8,613  |
| Amputation of upper limb                     | Amputation of Single Limb with CC Score 0-9                                               | £8,613  |
| Aortic surgery                               | Single Open Procedure, on Aorta or Abdominal Blood Vessel, with CC Score 0-3              | £8,526  |
| Arteriovenous shunt                          | Open Arteriovenous Fistula, Graft or Shunt Procedures                                     | £3,261  |
| Other daycase vascular surgery               | Open Operations, on Other or Unspecified Blood Vessels, with CC Score 0-1                 | £3,780  |
| Other inpatient vascular surgery             | Open Operations, on Other or Unspecified Blood Vessels, with CC Score 0-1                 | £3,780  |
| Surgery on arteries                          | Single Open Procedure on Blood Vessel of Lower Limb with CC Score 0-3                     | £6,968  |
| Varicose vein surgery                        | Open Treatment of Primary Unilateral Varicose Veins                                       | £2,669  |
| Vascular interventional radiology            | Percutaneous Transluminal Angioplasty of Single Blood Vessel with CC Score 0-2            | £1,757  |

Costs are based on NHS reference costs for 2019-20

\*Health Resource Group (HRG) categorisation is more granular than some of our orthopaedic procedure categories, making it difficult to match our procedures to a single HRG code. Therefore, for non-trauma procedures we took an average cost for the following HRG codes: Intermediate Hip Procedures for Non-Trauma, 19 years and over, with CC Score 1, Intermediate Knee Procedures for Non-Trauma, between 6 and 18 years, with CC Score 1+, Intermediate Foot Procedures for Non-Trauma, 19 years and over, with CC Score 0-1, Intermediate Hand Procedures for Non-Trauma, 19 years and over, with CC Score 0-1, Intermediate Shoulder Procedures for Non-Trauma, 19 years and over, with CC Score 0-1, Intermediate Elbow Procedures for Non-Trauma, 19 years and over, with CC Score 0-1, resulting in an estimated cost per procedure of £3,960. Equivalent trauma-related codes were used to calculate an average cost (£3,710) for trauma procedures.



**Supplementary Table 4: Results of expert survey**

| <b>Specialty of respondents</b>                                                                                                |    |
|--------------------------------------------------------------------------------------------------------------------------------|----|
| Anaesthetics                                                                                                                   | 2  |
| Breast surgery                                                                                                                 | 1  |
| Cardiac surgery                                                                                                                | 3  |
| Colorectal surgery                                                                                                             | 5  |
| General surgery                                                                                                                | 9  |
| Gynaecology                                                                                                                    | 3  |
| Head & Neck surgery                                                                                                            | 3  |
| Hepatobiliary surgery                                                                                                          | 3  |
| Neurosurgery                                                                                                                   | 3  |
| Ophthalmology                                                                                                                  | 1  |
| Orthopaedics                                                                                                                   | 9  |
| Plastic surgery                                                                                                                | 1  |
| Thoracic surgery                                                                                                               | 1  |
| Urology                                                                                                                        | 2  |
| Vascular surgery                                                                                                               | 1  |
| <b>Estimate for when elective procedures will return to pre-pandemic baseline volume</b>                                       |    |
| Already at or above pre-pandemic baseline                                                                                      | 12 |
| July 2022                                                                                                                      | 5  |
| December 2022                                                                                                                  | 6  |
| July 2023                                                                                                                      | 8  |
| December 2023                                                                                                                  | 4  |
| July 2024                                                                                                                      | 3  |
| December 2024                                                                                                                  | 1  |
| July 2025                                                                                                                      | 1  |
| December 2025                                                                                                                  | 4  |
| July 2026 - July 2029                                                                                                          | 0  |
| December 2029 or later                                                                                                         | 1  |
| Unlikely to ever return to pre-pandemic baseline                                                                               | 2  |
| <b>Estimates for realistic annual increase in elective procedure volume after it has returned to its pre-pandemic baseline</b> |    |
| Increase above pre-pandemic baseline will not be possible                                                                      | 22 |
| Up to 2.4% increase per year                                                                                                   | 9  |
| 2.5-4.9% increase per year                                                                                                     | 7  |
| 5.0-7.4% increase per year                                                                                                     | 2  |
| 7.5-9.9% increase per year                                                                                                     | 2  |
| 10.0-12.4% increase per year                                                                                                   | 2  |
| 12.5-19.9% increase per year                                                                                                   | 0  |
| 20.0% or greater increase per year                                                                                             | 3  |

Responses collected through anonymous online survey on 5-7 June 2022. Survey instrument is available in Supplement 1.

**Supplemental Table 5: Projections for annual incident need for elective procedures in 2022-29**

| <b>Period</b>           | <b>Annual incident need<br/>for elective procedures</b> |
|-------------------------|---------------------------------------------------------|
| April – December 2022   | 4,480,571                                               |
| January – December 2023 | 6,038,213                                               |
| January – December 2024 | 6,099,468                                               |
| January – December 2025 | 6,157,013                                               |
| January – December 2026 | 6,215,214                                               |
| January – December 2027 | 6,270,663                                               |
| January – December 2028 | 6,323,103                                               |
| January – December 2029 | 6,372,834                                               |

**Supplemental Table 6: Forecasts for total need for elective procedures in England in different scenarios**

| Month  | Current capacity | Pessimistic scenario | Central scenario | Optimistic scenario |
|--------|------------------|----------------------|------------------|---------------------|
| Mar-22 | 4,347,469        | 4,347,469            | 4,347,469        | 4,347,469           |
| Apr-22 | 4,439,973        | 4,435,513            | 4,432,044        | 4,432,044           |
| May-22 | 4,532,477        | 4,519,098            | 4,508,691        | 4,508,691           |
| Jun-22 | 4,624,981        | 4,598,222            | 4,577,409        | 4,577,409           |
| Jul-22 | 4,717,485        | 4,672,887            | 4,638,199        | 4,638,199           |
| Aug-22 | 4,809,989        | 4,743,091            | 4,691,060        | 4,691,060           |
| Sep-22 | 4,902,494        | 4,808,836            | 4,735,992        | 4,735,992           |
| Oct-22 | 4,994,998        | 4,870,121            | 4,772,995        | 4,772,995           |
| Nov-22 | 5,087,502        | 4,926,946            | 4,802,070        | 4,802,070           |
| Dec-22 | 5,180,006        | 4,979,312            | 4,823,216        | 4,823,216           |
| Jan-23 | 5,277,853        | 5,032,560            | 4,848,911        | 4,848,116           |
| Feb-23 | 5,375,700        | 5,081,349            | 4,873,811        | 4,871,428           |
| Mar-23 | 5,473,548        | 5,125,678            | 4,897,917        | 4,893,150           |
| Apr-23 | 5,571,395        | 5,165,547            | 4,921,228        | 4,913,283           |
| May-23 | 5,669,242        | 5,200,956            | 4,943,745        | 4,931,828           |
| Jun-23 | 5,767,090        | 5,231,905            | 4,965,468        | 4,948,783           |
| Jul-23 | 5,864,937        | 5,258,394            | 4,986,395        | 4,964,150           |
| Aug-23 | 5,962,784        | 5,284,883            | 5,006,529        | 4,977,927           |
| Sep-23 | 6,060,632        | 5,311,373            | 5,025,868        | 4,990,116           |
| Oct-23 | 6,158,479        | 5,337,862            | 5,044,412        | 5,000,715           |
| Nov-23 | 6,256,326        | 5,364,351            | 5,062,162        | 5,009,726           |
| Dec-23 | 6,354,174        | 5,390,841            | 5,079,117        | 5,017,147           |
| Jan-24 | 6,457,125        | 5,422,435            | 5,100,383        | 5,028,084           |
| Feb-24 | 6,560,077        | 5,454,029            | 5,120,854        | 5,037,432           |
| Mar-24 | 6,663,029        | 5,485,622            | 5,140,530        | 5,045,191           |
| Apr-24 | 6,765,981        | 5,517,216            | 5,159,413        | 5,051,362           |
| May-24 | 6,868,933        | 5,548,810            | 5,177,500        | 5,055,943           |
| Jun-24 | 6,971,885        | 5,580,404            | 5,194,793        | 5,058,935           |
| Jul-24 | 7,074,837        | 5,611,998            | 5,211,292        | 5,060,338           |
| Aug-24 | 7,177,788        | 5,643,592            | 5,226,996        | 5,060,152           |
| Sep-24 | 7,280,740        | 5,675,186            | 5,241,905        | 5,058,378           |
| Oct-24 | 7,383,692        | 5,706,780            | 5,256,020        | 5,055,014           |
| Nov-24 | 7,486,644        | 5,738,374            | 5,269,341        | 5,050,061           |
| Dec-24 | 7,589,596        | 5,769,967            | 5,281,867        | 5,043,519           |
| Jan-25 | 7,697,343        | 5,806,357            | 5,298,394        | 5,040,184           |
| Feb-25 | 7,805,090        | 5,842,746            | 5,314,126        | 5,035,260           |
| Mar-25 | 7,912,838        | 5,879,135            | 5,329,064        | 5,028,747           |
| Apr-25 | 8,020,585        | 5,915,525            | 5,343,208        | 5,020,644           |

|        |            |           |           |           |
|--------|------------|-----------|-----------|-----------|
| May-25 | 8,128,332  | 5,951,914 | 5,356,557 | 5,010,953 |
| Jun-25 | 8,236,079  | 5,988,303 | 5,369,112 | 4,999,673 |
| Jul-25 | 8,343,827  | 6,024,692 | 5,380,872 | 4,986,804 |
| Aug-25 | 8,451,574  | 6,061,082 | 5,391,837 | 4,972,346 |
| Sep-25 | 8,559,321  | 6,097,471 | 5,402,008 | 4,956,298 |
| Oct-25 | 8,667,069  | 6,133,860 | 5,411,385 | 4,938,662 |
| Nov-25 | 8,774,816  | 6,170,250 | 5,419,967 | 4,919,437 |
| Dec-25 | 8,882,563  | 6,206,639 | 5,427,754 | 4,898,623 |
| Jan-26 | 8,995,160  | 6,247,878 | 5,439,598 | 4,881,070 |
| Feb-26 | 9,107,758  | 6,289,118 | 5,450,646 | 4,861,928 |
| Mar-26 | 9,220,355  | 6,330,357 | 5,460,901 | 4,841,197 |
| Apr-26 | 9,332,953  | 6,371,596 | 5,470,360 | 4,818,877 |
| May-26 | 9,445,550  | 6,412,836 | 5,479,025 | 4,794,968 |
| Jun-26 | 9,558,147  | 6,454,075 | 5,486,896 | 4,769,470 |
| Jul-26 | 9,670,745  | 6,495,314 | 5,493,972 | 4,742,383 |
| Aug-26 | 9,783,342  | 6,536,554 | 5,500,254 | 4,713,707 |
| Sep-26 | 9,895,939  | 6,577,793 | 5,505,741 | 4,683,443 |
| Oct-26 | 10,008,537 | 6,619,033 | 5,510,434 | 4,651,589 |
| Nov-26 | 10,121,134 | 6,660,272 | 5,514,332 | 4,618,146 |
| Dec-26 | 10,233,731 | 6,701,511 | 5,517,436 | 4,583,114 |
| Jan-27 | 10,350,950 | 6,747,372 | 5,524,366 | 4,551,114 |
| Feb-27 | 10,468,168 | 6,793,232 | 5,530,502 | 4,517,525 |
| Mar-27 | 10,585,386 | 6,839,092 | 5,535,843 | 4,482,347 |
| Apr-27 | 10,702,604 | 6,884,952 | 5,540,390 | 4,445,580 |
| May-27 | 10,819,822 | 6,930,812 | 5,544,142 | 4,407,224 |
| Jun-27 | 10,937,040 | 6,976,672 | 5,547,099 | 4,367,279 |
| Jul-27 | 11,054,258 | 7,022,532 | 5,549,262 | 4,325,745 |
| Aug-27 | 11,171,476 | 7,068,393 | 5,550,631 | 4,282,622 |
| Sep-27 | 11,288,695 | 7,114,253 | 5,551,205 | 4,237,910 |
| Oct-27 | 11,405,913 | 7,160,113 | 5,550,985 | 4,191,609 |
| Nov-27 | 11,523,131 | 7,205,973 | 5,549,970 | 4,143,720 |
| Dec-27 | 11,640,349 | 7,251,833 | 5,548,160 | 4,094,241 |
| Jan-28 | 11,761,937 | 7,302,063 | 5,549,927 | 4,047,543 |
| Feb-28 | 11,883,525 | 7,352,293 | 5,550,898 | 3,999,256 |
| Mar-28 | 12,005,113 | 7,402,524 | 5,551,075 | 3,949,380 |
| Apr-28 | 12,126,701 | 7,452,754 | 5,550,458 | 3,897,915 |
| May-28 | 12,248,289 | 7,502,984 | 5,549,046 | 3,844,862 |
| Jun-28 | 12,369,878 | 7,553,214 | 5,546,840 | 3,790,219 |
| Jul-28 | 12,491,466 | 7,603,444 | 5,543,839 | 3,733,987 |
| Aug-28 | 12,613,054 | 7,653,674 | 5,540,044 | 3,676,166 |
| Sep-28 | 12,734,642 | 7,703,904 | 5,535,454 | 3,616,757 |
| Oct-28 | 12,856,230 | 7,754,134 | 5,530,070 | 3,555,758 |

|        |            |           |           |           |
|--------|------------|-----------|-----------|-----------|
| Nov-28 | 12,977,818 | 7,804,365 | 5,523,891 | 3,493,170 |
| Dec-28 | 13,099,406 | 7,854,595 | 5,516,918 | 3,428,994 |
| Jan-29 | 13,225,139 | 7,908,969 | 5,513,294 | 3,367,372 |
| Feb-29 | 13,350,871 | 7,963,343 | 5,508,876 | 3,304,162 |
| Mar-29 | 13,476,603 | 8,017,718 | 5,503,664 | 3,239,362 |
| Apr-29 | 13,602,336 | 8,072,092 | 5,497,657 | 3,172,974 |
| May-29 | 13,728,068 | 8,126,467 | 5,490,855 | 3,104,997 |
| Jun-29 | 13,853,801 | 8,180,841 | 5,483,259 | 3,035,430 |
| Jul-29 | 13,979,533 | 8,235,215 | 5,474,869 | 2,964,275 |
| Aug-29 | 14,105,265 | 8,289,590 | 5,465,684 | 2,891,531 |
| Sep-29 | 14,230,998 | 8,343,964 | 5,455,704 | 2,817,198 |
| Oct-29 | 14,356,730 | 8,398,339 | 5,444,931 | 2,741,275 |
| Nov-29 | 14,482,462 | 8,452,713 | 5,433,362 | 2,663,764 |
| Dec-29 | 14,608,195 | 8,507,087 | 5,420,999 | 2,584,664 |
